# Supplementary material for: Optimizing the dynamics of protein expression
Source: PubMed Central journal article supplement (PMC6525252; doi:10.1038/s41598-019-43857-5), 2019-05-17
Supplement: 41598_2019_43857_MOESM1_ESM.pdf [file 41598_2019_43857_MOESM1_ESM.pdf]

## Supplementary Information for “Optimizing the dynamics of protein expression”

Jan-Hendrik Trösemeier<sup>1,2,3,\*</sup>, Sophia Rudolf<sup>2,\*</sup>, Holger Loessner<sup>1</sup>, Benjamin Hofner<sup>1</sup>, Andreas Reuter<sup>1</sup>, Thomas Schulenburg<sup>1</sup>, Ina Koch<sup>3</sup>, Isabelle Bekerédjian-Ding<sup>1</sup>, Reinhard Lipowsky<sup>2</sup> Christel Kamp<sup>1,\*\*</sup>

<sup>1</sup>Paul-Ehrlich-Institut, Langen, Germany

<sup>2</sup>Max Planck Institute of Colloids and Interfaces, Golm, Germany

<sup>3</sup>Goethe University Frankfurt, Institute of Computer Science, Germany

\* joint first authors

\*\* E-mail: [christel.kamp@pei.de](mailto:christel.kamp@pei.de)

## Contents

|          |                                                                                                                    |           |
|----------|--------------------------------------------------------------------------------------------------------------------|-----------|
| <b>1</b> | <b>Model configuration</b>                                                                                         | <b>6</b>  |
| <b>2</b> | <b>Model parameters</b>                                                                                            | <b>8</b>  |
| 2.1      | Codon-specific elongation rates and accuracies . . . . .                                                           | 8         |
| 2.2      | Drop-off and initiation rates . . . . .                                                                            | 23        |
| 2.3      | Sequence features and function estimates in the protein expression score . . . . .                                 | 27        |
| <b>3</b> | <b>Computational and experimental studies with <i>ova</i> and <i>manA</i> variants</b>                             | <b>35</b> |
| <b>4</b> | <b>Experimental protocols</b>                                                                                      | <b>42</b> |
| 4.1      | Quantification of ManA expression in <i>S. Typhimurium</i> lysates by multiple reaction monitoring (MRM) . . . . . | 42        |
| 4.2      | qPCR for quantification of <i>manA</i> transcripts . . . . .                                                       | 43        |
| <b>5</b> | <b>Data retrieval and studied gene sequences</b>                                                                   | <b>44</b> |
| <b>6</b> | <b>Optimized Codon Translation fOr PrOtein Synthesis - OCTOPOS</b>                                                 | <b>61</b> |

## List of Figures

|    |                                                                                                                                                                                                                                                                                                                                                                                                                                                                                                                                                                                                                                                                                                                                                                                                                                                                                                                                                                                                                                                                                                                                                                                                                                               |    |
|----|-----------------------------------------------------------------------------------------------------------------------------------------------------------------------------------------------------------------------------------------------------------------------------------------------------------------------------------------------------------------------------------------------------------------------------------------------------------------------------------------------------------------------------------------------------------------------------------------------------------------------------------------------------------------------------------------------------------------------------------------------------------------------------------------------------------------------------------------------------------------------------------------------------------------------------------------------------------------------------------------------------------------------------------------------------------------------------------------------------------------------------------------------------------------------------------------------------------------------------------------------|----|
| S1 | <b>(Related to Figure 2) Dynamic regimes of mRNA translation for variable drop-off rates.</b> Ribosomal density of a gene with 300 codons and an elongation rate of $60.32 \text{ s}^{-1}$ as a function of relative initiation rate $\bar{\alpha} = \frac{\alpha}{\omega}$ and relative elongation rate of the last codon $\bar{\beta} = \frac{\beta}{\omega}$ (exit rate) for different drop-off rates per second $\gamma$ shown at the top of each panel. Generally, if the initiation rate increases or the rate of the last codon (or a bottleneck codon) decreases, the ribosome density will go up. There are various phase boundaries dividing phases of low ribosomal density (LD, upper left, $\bar{\beta}/\bar{\alpha} > 1$ ), high density (HD, lower right, $\bar{\beta}/\bar{\alpha} < 1$ ). Ribosome density is reduced in the high density phase by a non-zero drop-off rate. For sufficiently large $\bar{\alpha}$ and $\bar{\beta}$ the system reaches the maximum current phase (MC). The transition point can be approximated by $\bar{\alpha} = \bar{\beta} = \frac{1}{\sqrt{d+1}} \approx 0.24$ for a ribosomal footprint $d = 10$ and $\gamma = 0$ (1). This transition point is shown as vertical black line. . . . . | 6  |
| S2 | <b>Ratio of simulated translation time over estimated translation time for the wildtype <i>manA</i> sequence depending on initiation rates.</b> The estimated translation time is the sum of codon-dependent translation times, or the harmonic sum of the codon-dependent rates of a coding sequence. The simulated translation time, i.e. the time spent by ribosomes translating in the simulations, is generally larger than the estimated time since ribosome jamming is taken into account. Mean translation times from 1000 simulations with an <i>E. coli</i> drop-off rate of $6.6 \times 10^{-3} \text{ s}^{-1}$ depending on initiation rates per second are shown by triangles. . . . .                                                                                                                                                                                                                                                                                                                                                                                                                                                                                                                                           | 7  |
| S3 | <b>Elongation rate and error frequencies for <i>E. coli</i> at a specific growth rate of <math>2.5 \text{ h}^{-1}</math>.</b> In most cases an increase in elongation rate correlates with a decrease in error frequency. . . . .                                                                                                                                                                                                                                                                                                                                                                                                                                                                                                                                                                                                                                                                                                                                                                                                                                                                                                                                                                                                             | 20 |
| S4 | <b>Elongation rate and error frequencies for <i>S. cerevisiae</i>.</b> In most cases an increase in elongation rate correlates with a decrease in error frequency. . . . .                                                                                                                                                                                                                                                                                                                                                                                                                                                                                                                                                                                                                                                                                                                                                                                                                                                                                                                                                                                                                                                                    | 21 |
| S5 | <b>Elongation rate and error frequencies for HEK293.</b> In most cases an increase in elongation rate correlates with a decrease in error frequency. . . . .                                                                                                                                                                                                                                                                                                                                                                                                                                                                                                                                                                                                                                                                                                                                                                                                                                                                                                                                                                                                                                                                                  | 22 |

|     |                                                                                                                                                                                                                                                                                                                                                                                                                                                                                                                                                                                                                                                                                                                                                                                                                                               |    |
|-----|-----------------------------------------------------------------------------------------------------------------------------------------------------------------------------------------------------------------------------------------------------------------------------------------------------------------------------------------------------------------------------------------------------------------------------------------------------------------------------------------------------------------------------------------------------------------------------------------------------------------------------------------------------------------------------------------------------------------------------------------------------------------------------------------------------------------------------------------------|----|
| S6  | <b>Correlation of COSEM current with log-protein abundance in <i>E. coli</i> genes for different initiation rates.</b> Since there are little reliable estimates for initiation rates, an alternative is to choose the initiation rate that maximizes the correlation of COSEM current with log-protein abundance to enhance predictability. The simulations were run with the estimated drop-off rate $6.6 \times 10^{-3} \text{ s}^{-1}$ and hence, if the initiation rate is lower than the drop-off rate little correlation is expected. For <i>E. coli</i> a high initiation rate gives the highest correlation. . . . .                                                                                                                                                                                                                 | 24 |
| S7  | <b>Correlation of COSEM current with log-protein abundance in <i>S. cerevisiae</i> genes for different initiation rates.</b> Since there are little reliable estimates for initiation rates, an alternative is to choose the initiation rate that maximizes the correlation of COSEM current with log-protein abundance to enhance predictability. The simulations were run with the estimated drop-off rate $9.9 \times 10^{-3} \text{ s}^{-1}$ and hence, if the initiation rate is lower than the drop-off rate little correlation is expected. . . . .                                                                                                                                                                                                                                                                                    | 25 |
| S8  | <b>Correlation of COSEM current with log-protein abundance in HEK293 genes for different initiation rates.</b> Since there are little reliable estimates for initiation rates, an alternative is to choose the initiation rate that maximizes the correlation of COSEM current with log-protein abundance to enhance predictability. The simulations were run with the estimated drop-off rate $1.8 \times 10^{-3} \text{ s}^{-1}$ and hence, if the initiation rate is lower than the drop-off rate little correlation is expected. . . . .                                                                                                                                                                                                                                                                                                  | 26 |
| S9  | <b>Function estimates representing features contributing to the protein expression score of <i>E. coli</i>.</b> To estimate protein abundance a generalized additive model with model-based boosting was trained on 70 % of the data set. Monotonicity constraints were used for the COSEM current, average elongation rate and log-transcript abundance. Shown are only sequence features that were selected by the boosting algorithm to improve the prediction of the protein expression score. Generally, the fitted function estimates follow intuition: An increase in protein per time or COSEM current, average elongation rate, bottleneck index (less bottlenecks), accuracy, transcript abundance and folding energy (weaker folding) all contribute to higher expression whereas a balanced GC3 content appears favourable. . . . | 27 |
| S10 | <b>Function estimates representing features contributing to the protein expression score of <i>S. cerevisiae</i></b> as discussed in S9 . . . . .                                                                                                                                                                                                                                                                                                                                                                                                                                                                                                                                                                                                                                                                                             | 28 |
| S11 | <b>Function estimates representing features contributing to the protein expression score of HEK293</b> as discussed in S9 . . . . .                                                                                                                                                                                                                                                                                                                                                                                                                                                                                                                                                                                                                                                                                                           | 29 |
| S12 | <b>Correlations in sequence features considered in the protein expression score of <i>E. coli</i>.</b> Measured logarithmic protein abundance and sequence features of <i>E. coli</i> genes were plotted pairwise with their Pearson correlation coefficients shown in the upper part of the plot matrix. Note that several features have not been selected by the boosting algorithm to contribute to the protein expression score (ramp index, sequence length, number of hairpins). . . . .                                                                                                                                                                                                                                                                                                                                                | 30 |
| S13 | <b>Correlations in sequence features considered in the protein expression score of <i>S. cerevisiae</i>.</b> Measured logarithmic protein abundance and sequence features of <i>S. cerevisiae</i> genes were plotted pairwise with their Pearson correlation coefficients shown in the upper part of the plot matrix. Note that several features have not been selected by the boosting algorithm to contribute to the protein expression score (ramp index, sequence length, number of hairpins). . . . .                                                                                                                                                                                                                                                                                                                                    | 31 |

|     |                                                                                                                                                                                                                                                                                                                                                                                                                                                                                                                                                                                                                                                                                                                                                                                                                                                                                                                                                                                                                                                                                                                                                                                     |    |
|-----|-------------------------------------------------------------------------------------------------------------------------------------------------------------------------------------------------------------------------------------------------------------------------------------------------------------------------------------------------------------------------------------------------------------------------------------------------------------------------------------------------------------------------------------------------------------------------------------------------------------------------------------------------------------------------------------------------------------------------------------------------------------------------------------------------------------------------------------------------------------------------------------------------------------------------------------------------------------------------------------------------------------------------------------------------------------------------------------------------------------------------------------------------------------------------------------|----|
| S14 | <b>Correlations in sequence features considered in the protein expression score of human HEK29393 cell lines.</b> Measured logarithmic protein abundance and sequence features of <i>S. cerevisiae</i> genes were plotted pairwise with their Pearson correlation coefficients shown in the upper part of the plot matrix. Note that several features have not been selected by the boosting algorithm to contribute to the protein expression score (ramp index, sequence length, number of hairpins). . . . .                                                                                                                                                                                                                                                                                                                                                                                                                                                                                                                                                                                                                                                                     | 32 |
| S15 | <b>(Related to Figure 4) Function estimates and protein expression score against measured protein abundance for a reduced model of <i>E. coli</i>.</b> Different from the full protein expression score, here only COSEM current and log-protein abundance were used for prediction resulting in a slightly lower but comparable coefficient of determination showing that these two features already allow for good predictions of protein abundance. .                                                                                                                                                                                                                                                                                                                                                                                                                                                                                                                                                                                                                                                                                                                            | 33 |
| S16 | <b>(Related to Figure 4) Function estimates and protein expression score against measured protein abundance for a reduced model of <i>S. cerevisiae</i></b> following the lines of S15 . . . . .                                                                                                                                                                                                                                                                                                                                                                                                                                                                                                                                                                                                                                                                                                                                                                                                                                                                                                                                                                                    | 33 |
| S17 | <b>(Related to Figure 4) Function estimates and protein expression score against measured protein abundance for a reduced model of HEK293</b> following the lines of S15 . . . . .                                                                                                                                                                                                                                                                                                                                                                                                                                                                                                                                                                                                                                                                                                                                                                                                                                                                                                                                                                                                  | 33 |
| S18 | <b>(Related to Figure 4) Protein expression score against measured protein abundance for reduced models of <i>E. coli</i>, <i>S. cerevisiae</i> and HEK293 taking only transcript levels into account.</b> Different from the full protein expression score and the reduced model presented in Figures S15 to S17, here only transcript levels were used for prediction, again resulting in a lower coefficient of determination. . . . .                                                                                                                                                                                                                                                                                                                                                                                                                                                                                                                                                                                                                                                                                                                                           | 34 |
| S19 | <b>Harmonic and arithmetic mean of the elongation rates of all <i>E. coli</i>, <i>S. cerevisiae</i> and HEK293 sequences.</b> Given a sequence of codons with average individual elongation times $t_i$ the overall elongation time in the absence of ribosome queueing is, on average, $\sum_i t_i$ . In terms of rates $\omega_i$ , the average overall elongation time is $\sum_i 1/\omega_i$ , i.e. proportional to the inverse of the harmonic mean of elongation rates $1/(\sum_i 1/\omega_i)$ . However, both, arithmetic and harmonic mean are highly correlated and can be used as predictors for protein abundance. . . . .                                                                                                                                                                                                                                                                                                                                                                                                                                                                                                                                               | 34 |
| S20 | <b>Rolling mean of codon adaptation index for all <i>manA</i> variants of width 10.</b> Geometric mean of the first 50 codons' CAI is superimposed as solid line and the geometric mean of the rest of the sequences' CAI as dashed line, the sequences mean CAI is given in each panels title. The CAI is calculated with the codon usage of <i>Salmonella typhimurium</i> LT2 (2). The wildtype shows an existing ramp with a ratio of 0.83 of average CAI in the first 50 codons compared to the remaining codons. The Accuracy, Intermediate and Speed variants do not distinguish between ramp and non-ramp codons. Thus the ratio is close to 1 (0.91, 1.04, 0.98) in contrast to the variants with ramp and ratios of 0.77, 1.33, 0.63 in which the Intermediate variant has an average CAI that is lower than that of the wildtype and thus lower than the wildtype-ramp leading to a ratio larger than 1. Analysis of the <i>manA</i> mRNA sequence profile with respect to CAI and average elongation rate (cf. Figure S21) led us to the conservative approach of keeping a ramp of 50 codons in <i>manA</i> variants instead of 30 codons considered otherwise. . . . . | 35 |

|     |                                                                                                                                                                                                                                                                                                                                                                                                                                                                                                                                                                                                                                                                                                                                                                                                                                                                                                                                                                                                                                                                                                                                                                                                  |    |
|-----|--------------------------------------------------------------------------------------------------------------------------------------------------------------------------------------------------------------------------------------------------------------------------------------------------------------------------------------------------------------------------------------------------------------------------------------------------------------------------------------------------------------------------------------------------------------------------------------------------------------------------------------------------------------------------------------------------------------------------------------------------------------------------------------------------------------------------------------------------------------------------------------------------------------------------------------------------------------------------------------------------------------------------------------------------------------------------------------------------------------------------------------------------------------------------------------------------|----|
| S21 | <b>Rolling mean of average elongation rate for all <i>manA</i> variants of width 10.</b><br>Mean elongation rate of the first 50 codons is superimposed as solid line, mean elongation rate in the rest of the sequence as dashed line, the sequences' mean elongation rate is given in each panels title (in codons per second). The figure is similar to S20 with one notable difference: Whereas the ratio of CAI of the first 50 codons to the remainder for the Genearth variant is 0.98 and hence showing no relevant ramp-effect, there is a more pronounced difference of 0.86 for the average elongation rate. Analysis of the <i>manA</i> mRNA sequence profile with respect to CAI (cf. Figure S20) and average elongation rate led us to the conservative approach of keeping a ramp of 50 codons in <i>manA</i> variants instead of 30 codons considered otherwise. . . . .                                                                                                                                                                                                                                                                                                         | 36 |
| S22 | <b>Ova specific Western blot.</b> This blot corresponds to data shown in Figures 5, S24-S26. We prepared extracts of <i>S. Typhimurium</i> strains expressing variants of <i>ova</i> genes (cf. Figure 5, Table S19), i.e. wildtype (1), optimized with Genearth (2), deoptimized (3), optimized (4), intermediate (5), empty vector (6). We subjected 8 $\mu$ l of each extract to analysis as described in the methods section. The figure shows uncropped data derived from one gel, the asterisks indicate unspecific bands. . . . .                                                                                                                                                                                                                                                                                                                                                                                                                                                                                                                                                                                                                                                         | 37 |
| S23 | <b>ManA specific Western blot.</b> This blot corresponds to data shown in Figures 6, S24-S26. We prepared extracts of <i>S. Typhimurium</i> strains expressing <i>manA</i> genes (cf. Figure 6, Table S19), i.e. empty vector control (1), wildtype (2), optimized with Genearth with slow codons between secondary structures (3), optimized with Genearth (4), optimized with Genearth conserving ramp (5), deoptimized (6), optimized for accuracy (7), optimized for speed (8), intermediate (9), optimized for accuracy conserving ramp (10), optimized for speed with ramp (11), intermediate conserving ramp (12). We subjected 8 $\mu$ l of each extract to analysis as described in the methods section. The figure shows uncropped data derived from one gel, the asterisks indicates unspecific bands. . . . .                                                                                                                                                                                                                                                                                                                                                                        | 38 |
| S24 | <b>Comparison of mass spectrometry and Western blot protein abundance measurements.</b> The figure shows measured protein abundance relative to wildtype with standard deviations for both methods. The linear fit takes into account the respective uncertainties according to Orear's effective variance method. The two measurement methods show very similar results, i.e. slope and asymptote of the linear fit are $0.93 \pm 0.7$ and $0.1 \pm 0.1$ and the Pearson's correlation coefficient is 0.97 with a lower and upper confidence interval of 0.8 to 0.99. . . . .                                                                                                                                                                                                                                                                                                                                                                                                                                                                                                                                                                                                                   | 39 |
| S25 | <b>(Related to Figure 7) Measured and predicted protein abundance taking transcript levels into account.</b> Top Panel: mRNA transcript levels relative to wild type were determined for <i>manA</i> variants by quantitative real-time PCR (3 biological replicates and 3 technical replicates each) and were not significantly different from each other within the errors seen in the qPCR measurements. Bottom Panel: Measured protein abundance relative to wildtype compared to protein expression score relative to wild type for <i>manA</i> variants. Protein levels are weighted averages of mass spectrometry measurements (3 biological replicates and 3 digestion replicates each) and Western blots (3–5 replicates each) which correlate well (cf. Supplementary Figure S18). Different from Fig. 6 of the main manuscript mRNA levels were considered in the protein expression score. As transcript levels are not significantly different from each other within the large errors seen in the qPCR measurements their consideration in the protein expression score results in shifts and large error bars in the predicted protein levels without adding information. . . . . | 40 |
| S26 | <b>Protein expression levels relative to wildtype compared to doubling times of <i>S. Typhimurium</i> population on minimal mannose medium.</b> An increase of ManA expression reduces the doubling time and hence increases the growth rate. . . . .                                                                                                                                                                                                                                                                                                                                                                                                                                                                                                                                                                                                                                                                                                                                                                                                                                                                                                                                            | 41 |
| S27 | <b>OCTOPOS software</b> . . . . .                                                                                                                                                                                                                                                                                                                                                                                                                                                                                                                                                                                                                                                                                                                                                                                                                                                                                                                                                                                                                                                                                                                                                                | 61 |

## List of Tables

|     |                                                                                                                                                                                                                                                                                                                                                                                                                                                                                                                                                                                                                                |    |
|-----|--------------------------------------------------------------------------------------------------------------------------------------------------------------------------------------------------------------------------------------------------------------------------------------------------------------------------------------------------------------------------------------------------------------------------------------------------------------------------------------------------------------------------------------------------------------------------------------------------------------------------------|----|
| S1  | <b>Parameters used to calculate codon-specific elongation rates and error frequencies for <i>S. cerevisiae</i> and <i>HEK293</i> cells.</b> . . . . .                                                                                                                                                                                                                                                                                                                                                                                                                                                                          | 9  |
| S2  | <b><i>In-vivo</i> rates of ribosomal transitions for <i>S. cerevisiae</i> and <i>HEK293</i> cells.</b> The <i>in-vivo</i> rates of ribosomal transitions (with relative standard deviations RSD) were obtained under the assumption of a 2-1-2 pathway of tRNA release from the ribosomal E site by minimizing the kinetic distance to rates measured <i>in vitro</i> for <i>E. coli</i> , see (3; 4) for a detailed description and the corresponding parameters in <i>E. coli</i> . . . . .                                                                                                                                  | 9  |
| S3  | <b>Concentrations of tRNAs in <i>S. cerevisiae</i>.</b> . . . . .                                                                                                                                                                                                                                                                                                                                                                                                                                                                                                                                                              | 10 |
| S4  | <b>Concentrations of tRNAs in <i>HEK293</i> cells.</b> . . . . .                                                                                                                                                                                                                                                                                                                                                                                                                                                                                                                                                               | 11 |
| S5  | <b>Anti-codons of cognate tRNAs and codon usages (CU) for all codons in <i>S. cerevisiae</i>.</b> . . . . .                                                                                                                                                                                                                                                                                                                                                                                                                                                                                                                    | 12 |
| S6  | <b>Anti-codons of cognate tRNAs and codon usages (CU) for all codons in <i>HEK293</i> cells.</b> . . . . .                                                                                                                                                                                                                                                                                                                                                                                                                                                                                                                     | 13 |
| S7  | <b>Codon-specific elongation rates for <i>E. coli</i> at a specific growth rate of <math>2.5 \text{ h}^{-1}</math> as previously published in (4).</b> See supplementary data in (4) for codon-specific elongation rates at other specific growth rates. . . . .                                                                                                                                                                                                                                                                                                                                                               | 14 |
| S8  | <b>Codon-specific elongation rates for <i>S. cerevisiae</i>.</b> . . . . .                                                                                                                                                                                                                                                                                                                                                                                                                                                                                                                                                     | 15 |
| S9  | <b>Codon-specific elongation rates for <i>HEK293</i>.</b> . . . . .                                                                                                                                                                                                                                                                                                                                                                                                                                                                                                                                                            | 16 |
| S10 | <b>Codon-specific error frequencies for <i>E. coli</i> at a specific growth rate of <math>2.5 \text{ h}^{-1}</math>.</b> . . . . .                                                                                                                                                                                                                                                                                                                                                                                                                                                                                             | 17 |
| S11 | <b>Codon-specific error frequencies for <i>S. cerevisiae</i>.</b> . . . . .                                                                                                                                                                                                                                                                                                                                                                                                                                                                                                                                                    | 18 |
| S12 | <b>Codon-specific error frequencies for <i>HEK293</i> cells.</b> . . . . .                                                                                                                                                                                                                                                                                                                                                                                                                                                                                                                                                     | 19 |
| S13 | <b>Organism specific drop-off rates.</b> Drop-off rates were evaluated assuming drop-off probabilities per codon of $3 \times 10^{-4}$ . . . . .                                                                                                                                                                                                                                                                                                                                                                                                                                                                               | 23 |
| S14 | <b>Initiation rates maximizing the correlation between COSEM current and protein abundance.</b> Plausible ranges are suggested as there are not always clear optima as can be seen in supplementary Figs. S6 to S8 . . . . .                                                                                                                                                                                                                                                                                                                                                                                                   | 23 |
| S15 | <b>Final concentrations of the calibration peptide.</b> . . . . .                                                                                                                                                                                                                                                                                                                                                                                                                                                                                                                                                              | 42 |
| S16 | <b>MRM Transitions and collision energy.</b> . . . . .                                                                                                                                                                                                                                                                                                                                                                                                                                                                                                                                                                         | 43 |
| S17 | <b>Data sources for protein expression and mRNA transcript levels.</b> Data sets for protein abundance from PaxDb (5) are provided in the database's common abundance metric in parts per million (ppm) for the human <i>HEK293</i> cell line, <i>E. coli</i> and <i>S. cerevisiae</i> . Transcript abundance was estimated from RNA-seq experiments in which FPKM (number of Fragments Per Kilobase of transcript per Million mapped reads in an RNA-Seq experiment) was taken as a proxy for transcript abundance. For model based boosting log-transformed data were used. Latest date of retrieval was 2016/07/21. . . . . | 44 |
| S18 | <b>Ologinucleotides used.</b> . . . . .                                                                                                                                                                                                                                                                                                                                                                                                                                                                                                                                                                                        | 44 |
| S19 | <b>List of all sequences used.</b> The table lists internal ids for documentation purposes (plasmid, name, gid, DNA, GK), alternate long names and coding sequences. . . . .                                                                                                                                                                                                                                                                                                                                                                                                                                                   | 45 |

# 1 Model configuration

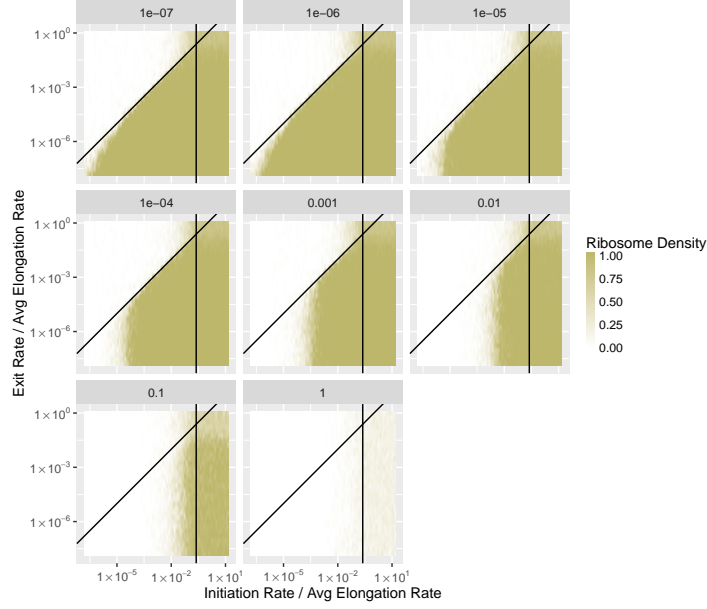

**Figure S1. (Related to Figure 2) Dynamic regimes of mRNA translation for variable drop-off rates.** Ribosomal density of a gene with 300 codons and an elongation rate of  $60.32 \text{ s}^{-1}$  as a function of relative initiation rate  $\bar{\alpha} = \frac{\alpha}{\omega}$  and relative elongation rate of the last codon  $\bar{\beta} = \frac{\beta}{\omega}$  (exit rate) for different drop-off rates per second  $\gamma$  shown at the top of each panel. Generally, if the initiation rate increases or the rate of the last codon (or a bottleneck codon) decreases, the ribosome density will go up. There are various phase boundaries dividing phases of low ribosomal density (LD, upper left,  $\bar{\beta}/\bar{\alpha} > 1$ ), high density (HD, lower right,  $\bar{\beta}/\bar{\alpha} < 1$ ). Ribosome density is reduced in the high density phase by a non-zero drop-off rate. For sufficiently large  $\bar{\alpha}$  and  $\bar{\beta}$  the system reaches the maximum current phase (MC). The transition point can be approximated by  $\bar{\alpha} = \bar{\beta} = \frac{1}{\sqrt{d+1}} \approx 0.24$  for a ribosomal footprint  $d = 10$  and  $\gamma = 0$  (1). This transition point is shown as vertical black line.

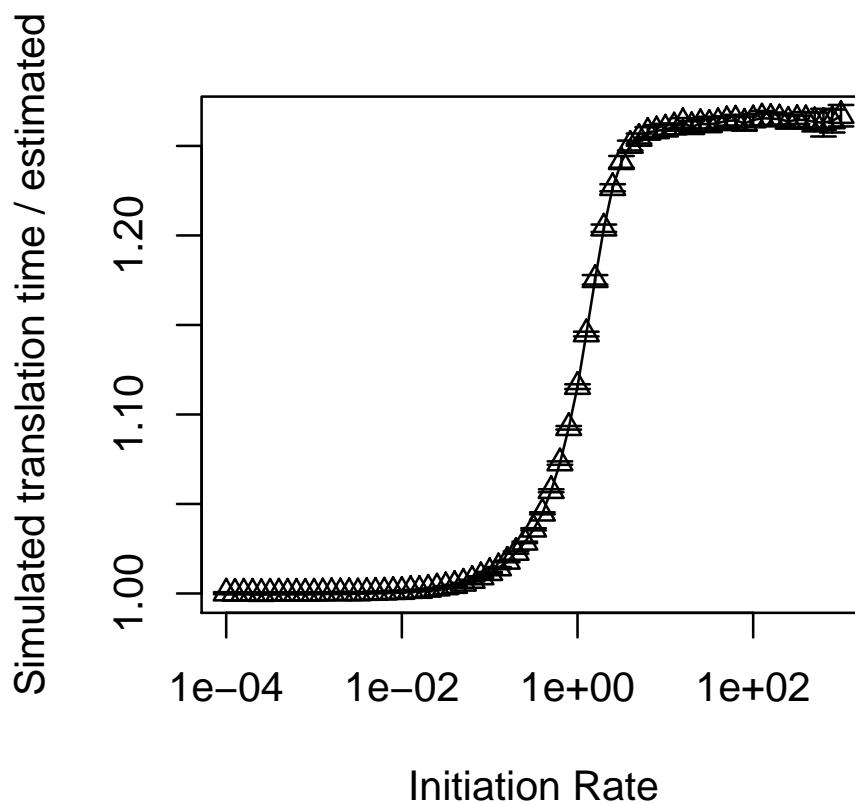

**Figure S2. Ratio of simulated translation time over estimated translation time for the wildtype *manA* sequence depending on initiation rates.** The estimated translation time is the sum of codon-dependent translation times, or the harmonic sum of the codon-dependent rates of a coding sequence. The simulated translation time, i.e. the time spent by ribosomes translating in the simulations, is generally larger than the estimated time since ribosome jamming is taken into account. Mean translation times from 1000 simulations with an *E. coli* drop-off rate of  $6.6 \times 10^{-3} \text{ s}^{-1}$  depending on initiation rates per second are shown by triangles.



## 2 Model parameters

### 2.1 Codon-specific elongation rates and accuracies

**Definitions** The **codon-specific elongation rate**  $\omega_{j,i}$  for codon  $i$  in sequence  $j$  is defined as the inverse of the time that it takes a ribosome in average to translate that codon.

The **codon-specific accuracy**  $a_{j,i}$  for codon  $i$  in sequence  $j$  is defined as the probability for a ribosome to incorporate a tRNA that is cognate (i.e., not near-cognate nor non-cognate) to codon  $i$  when translating codon  $i$ .

**Derivation** Codon-specific elongation rates  $\omega_{j,i}$  and accuracies  $a_{j,i}$  have been derived for *E. coli*, *S. cerevisiae* and human *HEK293* cells as was previously explained in detail (4). Briefly, we describe translation elongation as a Markov process with 12 states per codon, which represent the following steps:

Initial binding of a non-cognate, near-cognate, or cognate ternary complex (EF-Tu·GTP·aa-tRNA) to the ribosome is followed by either dissociation or further movement into the A site of the ribosome (recognition). The recognition of a cognate ternary complex is followed by GTPase activation and GTP hydrolysis with subsequent phosphate release and conformational rearrangements of EF-Tu. A cognate ternary complex is then usually fully accommodated in the ribosomal A site, or with small probability, is released from the A site. Near-cognate ternary complexes are usually rejected by the ribosome. With low probability, recognition of a near-cognate ternary complex leads to GTPase activation and GTP hydrolysis, after which the near-cognate ternary complex is most likely released or – again with low probability – gets fully accommodated in the ribosomal A site. Finally, after complete accommodation of a cognate or near-cognate tRNA in the A site, a new peptide bond is formed and the ribosome/tRNA complex undergoes translocation to the next codon on the mRNA.

Transitions between the different states of the Markov model occur with specific transition rates, for which values were obtained as introduced in (4). We assume that all transition rates are codon-independent, except for the binding rates of cognate, near-cognate, and non-cognate ternary complexes. These rates are taken to be proportional to the concentrations of free cognate, near-cognate, and non-cognate ternary complexes, respectively.

Codon-specific elongation rates  $\omega_{j,i}$  and accuracies  $a_{j,i}$  are calculated from the Markov model’s structure and transition rates by standard methods for Markov processes. In particular, elongation rates and accuracies explicitly depend on the rates of cognate, near-cognate, and non-cognate ternary complexes binding to the ribosome and, thus, on the concentrations of free cognate, near-cognate, and non-cognate ternary complexes, respectively. Exact expressions for the codon-specific elongation rates and accuracies are given in (4). All parameters needed to compute the codon-specific elongation rates and accuracies are listed in Tables S1 to S6 or assume values as given in (4). The results are listed in Tables S7 to S12. See also supplementary data in (4) for codon-specific elongation rates in *E. coli* at different specific growth rates.

**Table S1. Parameters used to calculate codon-specific elongation rates and error frequencies for *S. cerevisiae* and *HEK293* cells.**

| Parameter                      | Organism             | Value                | Reference                               |
|--------------------------------|----------------------|----------------------|-----------------------------------------|
| Ribosomal transition rates     | both                 | Table S2             | this document                           |
| Definition of ‘‘cognate’’      | <i>S. cerevisiae</i> | Table S3             | (6) (suppl. data)                       |
|                                | <i>HEK293</i>        | Table S4             | (7) (Fig. 34)                           |
| Definition of ‘‘near-cognate’’ | both                 |                      | according to (8; 3)                     |
| Codon usages                   | <i>S. cerevisiae</i> | Table S5             | from mRNA abundances (9) (suppl. data)  |
|                                | <i>HEK293</i>        | Table S6             | from mRNA abundances (10) (suppl. data) |
| tRNAs per cell                 | <i>S. cerevisiae</i> | Table S3             | (6)                                     |
|                                | <i>HEK293</i>        | Table S4             | (11)                                    |
| Ribosomes per cell             | <i>S. cerevisiae</i> | $2 \times 10^5$      | (9)                                     |
|                                | <i>HEK293</i>        | $1 \times 10^7$      | (12)                                    |
| eEF1a1 per cell                | <i>S. cerevisiae</i> | $2 \times 10^6$      | (13)                                    |
|                                | <i>HEK293</i>        | $1 \times 10^8$      | (12)                                    |
| Cell volume                    | <i>S. cerevisiae</i> | $37 \mu\text{m}^3$   | (14)                                    |
|                                | <i>HEK293</i>        | $1150 \mu\text{m}^3$ | (15)                                    |
| Average elongation rate        | <i>S. cerevisiae</i> | $33 \text{s}^{-1}$   | (9)                                     |
|                                | <i>HEK293</i>        | $6 \text{s}^{-1}$    | (16)                                    |

**Table S2. *In-vivo* rates of ribosomal transitions for *S. cerevisiae* and *HEK293* cells.** The *in-vivo* rates of ribosomal transitions (with relative standard deviations RSD) were obtained under the assumption of a 2-1-2 pathway of tRNA release from the ribosomal E site by minimizing the kinetic distance to rates measured *in vitro* for *E. coli*, see (3; 4) for a detailed description and the corresponding parameters in *E. coli*.

| Rate                    | <i>S. cerevisiae</i> | <i>HEK293</i> | RSD | Unit                             |
|-------------------------|----------------------|---------------|-----|----------------------------------|
| $\kappa_{\text{on}}^*$  | 94                   |               | 0.1 | $\mu\text{M}^{-1} \text{s}^{-1}$ |
| $\omega_{\text{off}}^*$ | 6400                 | 1800          | 0.4 | $\text{s}^{-1}$                  |
| $\omega_{\text{rec}}^*$ | 14900                | 2900          | 0.3 | $\text{s}^{-1}$                  |
| $\omega_{21}^*$         | 2                    | 2             | 0.3 | $\text{s}^{-1}$                  |
| $\omega_{23}^*$         | 2300                 | 1500          | 0.3 | $\text{s}^{-1}$                  |
| $\omega_{\text{con}}^*$ | 820                  | 470           |     | $\text{s}^{-1}$                  |
| $\omega_{45}^*$         | 750                  | 230           | 0.2 | $\text{s}^{-1}$                  |
| $\omega_{40}^*$         | 1                    | 1             |     | $\text{s}^{-1}$                  |
| $\omega_{76}^*$         | 16700                | 3200          | 0.3 | $\text{s}^{-1}$                  |
| $\omega_{78}^*$         | 3                    | 5             | 0.3 | $\text{s}^{-1}$                  |
| $\omega_{910}^*$        | 0.28                 | 0.29          | 0.2 | $\text{s}^{-1}$                  |
| $\omega_{90}^*$         | 8                    | 6             | 0.2 | $\text{s}^{-1}$                  |
| $\omega_{\text{pro}}^*$ | 450                  | 170           | 0.5 | $\text{s}^{-1}$                  |

**Table S3. Concentrations of tRNAs in *S. cerevisiae*.**

| Anti-Codon | Amino acid | Molecules/cell |
|------------|------------|----------------|
| UGC        | Ala        | 51437          |
| IGC        | Ala        | 113163         |
| UCU        | Arg        | 113163         |
| CCU        | Arg        | 10289          |
| CCG        | Arg        | 10289          |
| ICG        | Arg        | 61726          |
| GUU        | Asn        | 102875         |
| GUC        | Asp        | 154315         |
| GCA        | Cys        | 41152          |
| UUG        | Gln        | 92589          |
| CUG        | Gln        | 10289          |
| UUC        | Glu        | 144026         |
| CUC        | Glu        | 20574          |
| UCC        | Gly        | 30863          |
| CCC        | Gly        | 20574          |
| GCC        | Gly        | 164601         |
| GUG        | His        | 72012          |
| UAU        | Ile        | 20574          |
| IAU        | Ile        | 133738         |
| UAG        | Leu        | 30863          |
| GAG        | Leu        | 10289          |
| UAA        | Leu        | 72012          |
| CAA        | Leu        | 102875         |
| UUU        | Lys        | 72012          |
| CUU        | Lys        | 144026         |
| CAU        | Met        | 51437          |
| GAA        | Phe        | 102875         |
| UGG        | Pro        | 102875         |
| IGG        | Pro        | 20574          |
| GCU        | Ser        | 41152          |
| UGA        | Ser        | 30863          |
| CGA        | Ser        | 10289          |
| IGA        | Ser        | 113163         |
| UGU        | Thr        | 41152          |
| CGU        | Thr        | 10289          |
| IGU        | Thr        | 113163         |
| CCA        | Trp        | 61726          |
| GUA        | Tyr        | 82300          |
| UAC        | Val        | 20574          |
| CAC        | Val        | 20574          |
| IAC        | Val        | 144026         |

Table S4. Concentrations of tRNAs in *HEK293* cells.

| Anti-Codon | Amino acid | Molecules/cell |
|------------|------------|----------------|
| UGC        | Ala        | 916573         |
| AGC        | Ala        | 3384116        |
| CGC        | Ala        | 850415         |
| UCG        | Arg        | 2250540        |
| CCG        | Arg        | 1446617        |
| ACG        | Arg        | 1179105        |
| UCU        | Arg        | 329157         |
| CCU        | Arg        | 1053973        |
| AUU        | Asn        | 0              |
| GUU        | Asn        | 2452966        |
| GUC        | Asp        | 4288905        |
| GCA        | Cys        | 1292794        |
| UUG        | Gln        | 1782775        |
| CUG        | Gln        | 4822637        |
| UUC        | Glu        | 1552467        |
| CUC        | Glu        | 1328953        |
| UCC        | Gly        | 1195112        |
| CCC        | Gly        | 1813654        |
| GCC        | Gly        | 4646638        |
| GUG        | His        | 3156779        |
| UAU        | Ile        | 381136         |
| AAU        | Ile        | 2266860        |
| GAU        | Ile        | 3321           |
| UAG        | Leu        | 470419         |
| UAA        | Leu        | 2049035        |
| CAA        | Leu        | 726362         |
| CAG        | Leu        | 3139571        |
| AAG        | Leu        | 492534         |
| UUU        | Lys        | 3297624        |
| CUU        | Lys        | 2095918        |
| CAU        | Met        | 7409911        |
| GAA        | Phe        | 2426202        |
| UGG        | Pro        | 1273045        |
| AGG        | Pro        | 601330         |
| CGG        | Pro        | 778307         |
| UGA        | Ser        | 2949312        |
| CGA        | Ser        | 436044         |
| AGA        | Ser        | 1339964        |
| GCU        | Ser        | 2392655        |
| UGU        | Thr        | 1461888        |
| CGU        | Thr        | 961206         |
| AGU        | Thr        | 2399438        |
| CCA        | Trp        | 1695475        |
| GUA        | Tyr        | 984731         |
| AUA        | Tyr        | 261            |
| UAC        | Val        | 1960321        |
| CAC        | Val        | 10343136       |
| AAC        | Val        | 5919816        |

**Table S5. Anti-codons of cognate tRNAs and codon usages (CU) for all codons in *S. cerevisiae*.**

| Codon | Anti-codon | CU [%] | Codon | Anti-codon  | CU [%] |
|-------|------------|--------|-------|-------------|--------|
| AAA   | UUU        | 2.91   | GAA   | UUC         | 5.2    |
| AAC   | GUU        | 3.01   | GAC   | GUC         | 2.35   |
| AAG   | CUU        | 5.76   | GAG   | CUC         | 1.13   |
| AAU   | GUU        | 1.77   | GAU   | GUC         | 2.73   |
| ACA   | UGU        | 0.9    | GCA   | UGC         | 0.95   |
| ACC   | IGU        | 1.99   | GCC   | IGC         | 2.07   |
| ACG   | CGU        | 0.39   | GCG   | UGC         | 0.33   |
| ACU   | IGU        | 2.5    | GCU   | IGC         | 4.65   |
| AGA   | UCU        | 3.79   | GGA   | UCC         | 0.58   |
| AGC   | GCU        | 0.59   | GGC   | GCC         | 0.76   |
| AGG   | CCU        | 0.46   | GGG   | CCC         | 0.37   |
| AGU   | GCU        | 0.73   | GGU   | GCC         | 4.81   |
| AUA   | UAU        | 0.75   | GUA   | UAC         | 0.61   |
| AUC   | IAU        | 2.41   | GUC   | IAC         | 2.36   |
| AUG   | CAU        | 1.47   | GUG   | CAC         | 0.68   |
| AUU   | IAU        | 2.7    | GUU   | IAC         | 3.43   |
| CAA   | UUG        | 3.2    | UAA   | <i>stop</i> |        |
| CAC   | GUG        | 1.13   | UAC   | GUA         | 2.07   |
| CAG   | CUG        | 0.64   | UAG   | <i>stop</i> |        |
| CAU   | GUG        | 0.86   | UAU   | GUA         | 1.07   |
| CCA   | UGG        | 2.64   | UCA   | UGA         | 0.94   |
| CCC   | IGG        | 0.35   | UCC   | IGA         | 1.91   |
| CCG   | UGG        | 0.23   | UCG   | CGA         | 0.4    |
| CCU   | IGG        | 0.87   | UCU   | IGA         | 2.87   |
| CGA   | ICG        | 0.1    | UGA   | <i>stop</i> |        |
| CGC   | ICG        | 0.13   | UGC   | GCA         | 0.39   |
| CGG   | CCG        | 0.08   | UGG   | CCA         | 0.96   |
| CGU   | ICG        | 0.93   | UGU   | GCA         | 0.87   |
| CUA   | UAG        | 0.91   | UUA   | UAA         | 1.87   |
| CUC   | GAG        | 0.27   | UUC   | GAA         | 2.34   |
| CUG   | UAG        | 0.54   | UUG   | CAA         | 4.08   |
| CUU   | GAG        | 0.62   | UUU   | GAA         | 1.57   |

**Table S6. Anti-codons of cognate tRNAs and codon usages (CU) for all codons in *HEK293* cells.**

| Codon | Anti-codon | CU [%] | Codon | Anti-codon  | CU [%] |
|-------|------------|--------|-------|-------------|--------|
| AAA   | UUU        | 2.73   | GAA   | UUC         | 3.19   |
| AAC   | GUU        | 1.94   | GAC   | GUC         | 2.69   |
| AAG   | CUU        | 4.11   | GAG   | CUC         | 4.35   |
| AAU   | GUU        | 1.66   | GAU   | GUC         | 2.59   |
| ACA   | UGU        | 1.41   | GCA   | UGC         | 1.68   |
| ACC   | AGU        | 1.76   | GCC   | AGC         | 2.91   |
| ACG   | CGU        | 0.56   | GCG   | CGC         | 0.75   |
| ACU   | AGU        | 1.31   | GCU   | AGC         | 2.14   |
| AGA   | UCU        | 1.14   | GGA   | UCC         | 1.67   |
| AGC   | GCU        | 1.64   | GGC   | GCC         | 2.38   |
| AGG   | CCU        | 1.02   | GGG   | CCC         | 1.51   |
| AGU   | GCU        | 1.12   | GGU   | GCC         | 1.33   |
| AUA   | UAU        | 0.62   | GUA   | UAC         | 0.77   |
| AUC   | AAU,GAU    | 2.29   | GUC   | AAC         | 1.41   |
| AUG   | CAU        | 2.35   | GUG   | CAC         | 2.94   |
| AUU   | AAU        | 1.79   | GUU   | AAC         | 1.2    |
| CAA   | UUG        | 1.04   | UAA   | <i>stop</i> |        |
| CAC   | GUG        | 1.32   | UAC   | GUA         | 1.49   |
| CAG   | CUG        | 3.45   | UAG   | <i>stop</i> |        |
| CAU   | GUG        | 0.97   | UAU   | GUA,AUA     | 1.23   |
| CCA   | UGG        | 1.58   | UCA   | UGA         | 1.04   |
| CCC   | AGG        | 1.8    | UCC   | AGA         | 1.58   |
| CCG   | CGG        | 0.64   | UCG   | CGA         | 0.41   |
| CCU   | AGG        | 1.71   | UCU   | AGA         | 1.45   |
| CGA   | UCG        | 0.75   | UGA   | <i>stop</i> |        |
| CGC   | ACG        | 1.17   | UGC   | GCA         | 0.9    |
| CGG   | CCG        | 1.28   | UGG   | CCA         | 1.02   |
| CGU   | ACG        | 0.62   | UGU   | GCA         | 0.78   |
| CUA   | UAG        | 0.65   | UUA   | UAA         | 0.67   |
| CUC   | AAG        | 1.7    | UUC   | GAA         | 1.86   |
| CUG   | CAG        | 3.68   | UUG   | CAA         | 1.26   |
| CUU   | AAG        | 1.29   | UUU   | GAA         | 1.68   |

**Table S7. Codon-specific elongation rates for *E. coli* at a specific growth rate of  $2.5 \text{ h}^{-1}$  as previously published in (4).** See supplementary data in (4) for codon-specific elongation rates at other specific growth rates.

| Codon | Codon-specific elongation rate [ $\text{s}^{-1}$ ] | Codon | Codon-specific elongation rate [ $\text{s}^{-1}$ ] |
|-------|----------------------------------------------------|-------|----------------------------------------------------|
| AAA   | 12.28                                              | GAA   | 63.67                                              |
| AAC   | 16.65                                              | GAC   | 38.98                                              |
| AAG   | 12.17                                              | GAG   | 63.24                                              |
| AAU   | 16.43                                              | GAU   | 37.06                                              |
| ACA   | 22.66                                              | GCA   | 43.12                                              |
| ACC   | 16.23                                              | GCC   | 10.43                                              |
| ACG   | 32.91                                              | GCG   | 42.27                                              |
| ACU   | 32.21                                              | GCU   | 41.95                                              |
| AGA   | 15.95                                              | GGA   | 23.06                                              |
| AGC   | 16.75                                              | GGC   | 55.93                                              |
| AGG   | 10.64                                              | GGG   | 36.68                                              |
| AGU   | 16.55                                              | GGU   | 53.69                                              |
| AUA   | 5.53                                               | GUA   | 48.35                                              |
| AUC   | 59.37                                              | GUC   | 23.09                                              |
| AUG   | 10.87                                              | GUG   | 45.43                                              |
| AUU   | 57.40                                              | GUU   | 56.47                                              |
| CAA   | 15.99                                              | UAA   | <i>stop</i>                                        |
| CAC   | 11.85                                              | UAC   | 33.90                                              |
| CAG   | 16.30                                              | UAG   | <i>stop</i>                                        |
| CAU   | 11.83                                              | UAU   | 33.44                                              |
| CCA   | 3.92                                               | UCA   | 26.18                                              |
| CCC   | 14.55                                              | UCC   | 12.27                                              |
| CCG   | 9.68                                               | UCG   | 30.02                                              |
| CCU   | 16.79                                              | UCU   | 32.65                                              |
| CGA   | 62.78                                              | UGA   | <i>stop</i>                                        |
| CGC   | 60.37                                              | UGC   | 26.44                                              |
| CGG   | 9.26                                               | UGG   | 21.68                                              |
| CGU   | 60.30                                              | UGU   | 26.09                                              |
| CUA   | 11.98                                              | UUA   | 15.52                                              |
| CUC   | 18.82                                              | UUC   | 8.05                                               |
| CUG   | 60.32                                              | UUG   | 44.25                                              |
| CUU   | 18.12                                              | UUU   | 7.60                                               |

Table S8. Codon-specific elongation rates for *S. cerevisiae*.

| Codon | Codon-specific elongation rate [s <sup>-1</sup> ] | Codon | Codon-specific elongation rate [s <sup>-1</sup> ] |
|-------|---------------------------------------------------|-------|---------------------------------------------------|
| AAA   | 39.61                                             | GAA   | 70.86                                             |
| AAC   | 46.99                                             | GAC   | 72.97                                             |
| AAG   | 69.91                                             | GAG   | 10.42                                             |
| AAU   | 46.99                                             | GAU   | 72.97                                             |
| ACA   | 31.84                                             | GCA   | 37.24                                             |
| ACC   | 57.40                                             | GCC   | 41.15                                             |
| ACG   | 7.23                                              | GCG   | 38.63                                             |
| ACU   | 57.40                                             | GCU   | 41.15                                             |
| AGA   | 63.49                                             | GGA   | 25.46                                             |
| AGC   | 27.25                                             | GGC   | 77.24                                             |
| AGG   | 6.64                                              | GGG   | 18.60                                             |
| AGU   | 27.25                                             | GGU   | 77.24                                             |
| AUA   | 14.29                                             | GUA   | 15.74                                             |
| AUC   | 64.73                                             | GUC   | 65.35                                             |
| AUG   | 36.11                                             | GUG   | 15.34                                             |
| AUU   | 64.73                                             | GUU   | 65.35                                             |
| CAA   | 52.70                                             | UAA   | <i>stop</i>                                       |
| CAC   | 46.49                                             | UAC   | 45.87                                             |
| CAG   | 4.54                                              | UAG   | <i>stop</i>                                       |
| CAU   | 46.49                                             | UAU   | 45.87                                             |
| CCA   | 62.11                                             | UCA   | 23.05                                             |
| CCC   | 9.34                                              | UCC   | 56.02                                             |
| CCG   | 64.19                                             | UCG   | 7.23                                              |
| CCU   | 9.34                                              | UCU   | 56.02                                             |
| CGA   | 45.98                                             | UGA   | <i>stop</i>                                       |
| CGC   | 46.28                                             | UGC   | 28.23                                             |
| CGG   | 11.05                                             | UGG   | 49.66                                             |
| CGU   | 46.28                                             | UGU   | 28.23                                             |
| CUA   | 17.82                                             | UUA   | 49.64                                             |
| CUC   | 1.79                                              | UUC   | 52.98                                             |
| CUG   | 18.18                                             | UUG   | 54.89                                             |
| CUU   | 1.79                                              | UUU   | 52.98                                             |



**Table S9. Codon-specific elongation rates for HEK293.**

| Codon | Codon-specific elongation rate [s <sup>-1</sup> ] | Codon | Codon-specific elongation rate [s <sup>-1</sup> ] |
|-------|---------------------------------------------------|-------|---------------------------------------------------|
| AAA   | 21.21984                                          | GAA   | 9.11984                                           |
| AAC   | 14.12447                                          | GAC   | 21.96470                                          |
| AAG   | 11.23207                                          | GAG   | 5.48026                                           |
| AAU   | 14.12483                                          | GAU   | 21.96470                                          |
| ACA   | 10.48064                                          | GCA   | 5.89915                                           |
| ACC   | 14.78216                                          | GCC   | 17.75464                                          |
| ACG   | 7.33020                                           | GCG   | 6.04496                                           |
| ACU   | 14.78260                                          | GCU   | 17.75464                                          |
| AGA   | 1.59880                                           | GGA   | 8.12605                                           |
| AGC   | 15.08409                                          | GGC   | 24.84194                                          |
| AGG   | 7.37762                                           | GGG   | 11.61666                                          |
| AGU   | 15.08453                                          | GGU   | 24.84194                                          |
| AUA   | 2.51558                                           | GUA   | 13.09163                                          |
| AUC   | 11.82971                                          | GUC   | 28.00956                                          |
| AUG   | 34.86228                                          | GUG   | 41.11098                                          |
| AUU   | 11.81255                                          | GUU   | 28.01011                                          |
| CAA   | 12.59770                                          | UAA   | 171.67736                                         |
| CAC   | 18.93839                                          | UAC   | 5.27462                                           |
| CAG   | 27.28044                                          | UAG   | 171.67736                                         |
| CAU   | 18.93835                                          | UAU   | 5.27632                                           |
| CCA   | 8.84760                                           | UCA   | 21.12999                                          |
| CCC   | 1.00958                                           | UCC   | 7.59376                                           |
| CCG   | 5.92273                                           | UCG   | 3.59940                                           |
| CCU   | 1.00958                                           | UCU   | 7.59376                                           |
| CGA   | 17.13684                                          | UGA   | 171.67736                                         |
| CGC   | 7.35781                                           | UGC   | 8.83135                                           |
| CGG   | 10.10466                                          | UGG   | 13.32441                                          |
| CGU   | 7.35781                                           | UGU   | 8.83135                                           |
| CUA   | 3.35796                                           | UUA   | 15.73559                                          |
| CUC   | 0.71702                                           | UUC   | 14.33256                                          |
| CUG   | 16.39336                                          | UUG   | 4.20173                                           |
| CUU   | 0.71704                                           | UUU   | 14.33295                                          |

Table S10. Codon-specific error frequencies for *E. coli* at a specific growth rate of  $2.5 \text{ h}^{-1}$ .

| Codon | Error frequency [ $10^{-4}$ ] | Codon | Error frequency [ $10^{-4}$ ] |
|-------|-------------------------------|-------|-------------------------------|
| AAA   | 8.96                          | GAA   | 1.08                          |
| AAC   | 7.65                          | GAC   | 3.18                          |
| AAG   | 9.66                          | GAG   | 1.18                          |
| AAU   | 8.37                          | GAU   | 4.40                          |
| ACA   | 3.54                          | GCA   | 2.49                          |
| ACC   | 6.74                          | GCC   | 14.36                         |
| ACG   | 2.17                          | GCG   | 2.92                          |
| ACU   | 3.55                          | GCU   | 3.08                          |
| AGA   | 6.80                          | GGA   | 8.91                          |
| AGC   | 10.90                         | GGC   | 1.64                          |
| AGG   | 9.61                          | GGG   | 4.06                          |
| AGU   | 11.55                         | GGU   | 2.33                          |
| AUA   | 26.51                         | GUA   | 1.97                          |
| AUC   | 0.69                          | GUC   | 6.99                          |
| AUG   | 18.24                         | GUG   | 3.19                          |
| AUU   | 1.22                          | GUU   | 1.78                          |
| CAA   | 8.94                          | UAA   | <i>stop</i>                   |
| CAC   | 12.61                         | UAC   | 1.82                          |
| CAG   | 8.80                          | UAG   | <i>stop</i>                   |
| CAU   | 12.77                         | UAU   | 2.19                          |
| CCA   | 38.82                         | UCA   | 2.37                          |
| CCC   | 6.98                          | UCC   | 7.13                          |
| CCG   | 15.52                         | UCG   | 3.15                          |
| CCU   | 8.49                          | UCU   | 2.79                          |
| CGA   | 0.44                          | UGA   | <i>stop</i>                   |
| CGC   | 1.03                          | UGC   | 5.12                          |
| CGG   | 18.21                         | UGG   | 4.64                          |
| CGU   | 1.05                          | UGU   | 5.59                          |
| CUA   | 14.13                         | UUA   | 6.11                          |
| CUC   | 9.11                          | UUC   | 19.47                         |
| CUG   | 1.04                          | UUG   | 2.16                          |
| CUU   | 11.02                         | UUU   | 26.22                         |

**Table S11. Codon-specific error frequencies for *S. cerevisiae*.**

| Codon | Error frequency [ $10^{-4}$ ] | Codon | Error frequency [ $10^{-4}$ ] |
|-------|-------------------------------|-------|-------------------------------|
| AAA   | 2.08                          | GAA   | 0.69                          |
| AAC   | 2.00                          | GAC   | 1.04                          |
| AAG   | 0.40                          | GAG   | 8.18                          |
| AAU   | 2.00                          | GAU   | 1.04                          |
| ACA   | 2.28                          | GCA   | 1.72                          |
| ACC   | 1.02                          | GCC   | 2.24                          |
| ACG   | 11.78                         | GCG   | 0.97                          |
| ACU   | 1.02                          | GCU   | 2.24                          |
| AGA   | 0.56                          | GGA   | 3.39                          |
| AGC   | 3.66                          | GGC   | 0.76                          |
| AGG   | 11.67                         | GGG   | 3.35                          |
| AGU   | 3.66                          | GGU   | 0.76                          |
| AUA   | 5.82                          | GUA   | 5.04                          |
| AUC   | 0.93                          | GUC   | 1.10                          |
| AUG   | 1.68                          | GUG   | 4.37                          |
| AUU   | 0.93                          | GUU   | 1.10                          |
| CAA   | 1.17                          | UAA   | <i>stop</i>                   |
| CAC   | 1.40                          | UAC   | 1.55                          |
| CAG   | 17.04                         | UAG   | <i>stop</i>                   |
| CAU   | 1.40                          | UAU   | 1.55                          |
| CCA   | 0.66                          | UCA   | 2.69                          |
| CCC   | 9.20                          | UCC   | 0.97                          |
| CCG   | 0.26                          | UCG   | 10.94                         |
| CCU   | 9.20                          | UCU   | 0.97                          |
| CGA   | 1.14                          | UGA   | <i>stop</i>                   |
| CGC   | 1.03                          | UGC   | 3.15                          |
| CGG   | 4.95                          | UGG   | 0.53                          |
| CGU   | 1.03                          | UGU   | 3.15                          |
| CUA   | 3.55                          | UUA   | 0.77                          |
| CUC   | 49.82                         | UUC   | 1.47                          |
| CUG   | 2.69                          | UUG   | 0.84                          |
| CUU   | 49.82                         | UUU   | 1.47                          |

Table S12. Codon-specific error frequencies for *HEK293* cells.

| Codon | Error frequency [ $10^{-4}$ ] | Codon | Error frequency [ $10^{-4}$ ] |
|-------|-------------------------------|-------|-------------------------------|
| AAA   | 4.88                          | GAA   | 19.98                         |
| AAC   | 15.46                         | GAC   | 9.73                          |
| AAG   | 22.17                         | GAG   | 56.89                         |
| AAU   | 15.46                         | GAU   | 9.73                          |
| ACA   | 15.16                         | GCA   | 32.46                         |
| ACC   | 10.59                         | GCC   | 11.97                         |
| ACG   | 29.21                         | GCG   | 41.88                         |
| ACU   | 10.59                         | GCU   | 11.97                         |
| AGA   | 109.98                        | GGA   | 21.81                         |
| AGC   | 11.34                         | GGC   | 7.80                          |
| AGG   | 31.56                         | GGG   | 22.57                         |
| AGU   | 11.34                         | GGU   | 7.80                          |
| AUA   | 104.34                        | GUA   | 19.95                         |
| AUC   | 22.37                         | GUC   | 8.50                          |
| AUG   | 4.62                          | GUG   | 3.69                          |
| AUU   | 22.41                         | GUU   | 8.49                          |
| CAA   | 15.84                         | UAA   | <i>stop</i>                   |
| CAC   | 8.77                          | UAC   | 35.56                         |
| CAG   | 4.56                          | UAG   | <i>stop</i>                   |
| CAU   | 8.77                          | UAU   | 35.54                         |
| CCA   | 16.90                         | UCA   | 3.94                          |
| CCC   | 179.23                        | UCC   | 22.90                         |
| CCG   | 29.98                         | UCG   | 38.16                         |
| CCU   | 179.23                        | UCU   | 22.90                         |
| CGA   | 5.28                          | UGA   | <i>stop</i>                   |
| CGC   | 27.38                         | UGC   | 20.19                         |
| CGG   | 20.58                         | UGG   | 6.62                          |
| CGU   | 27.38                         | UGU   | 20.19                         |
| CUA   | 55.73                         | UUA   | 7.06                          |
| CUC   | 343.60                        | UUC   | 11.71                         |
| CUG   | 17.06                         | UUG   | 81.58                         |
| CUU   | 343.54                        | UUU   | 11.71                         |

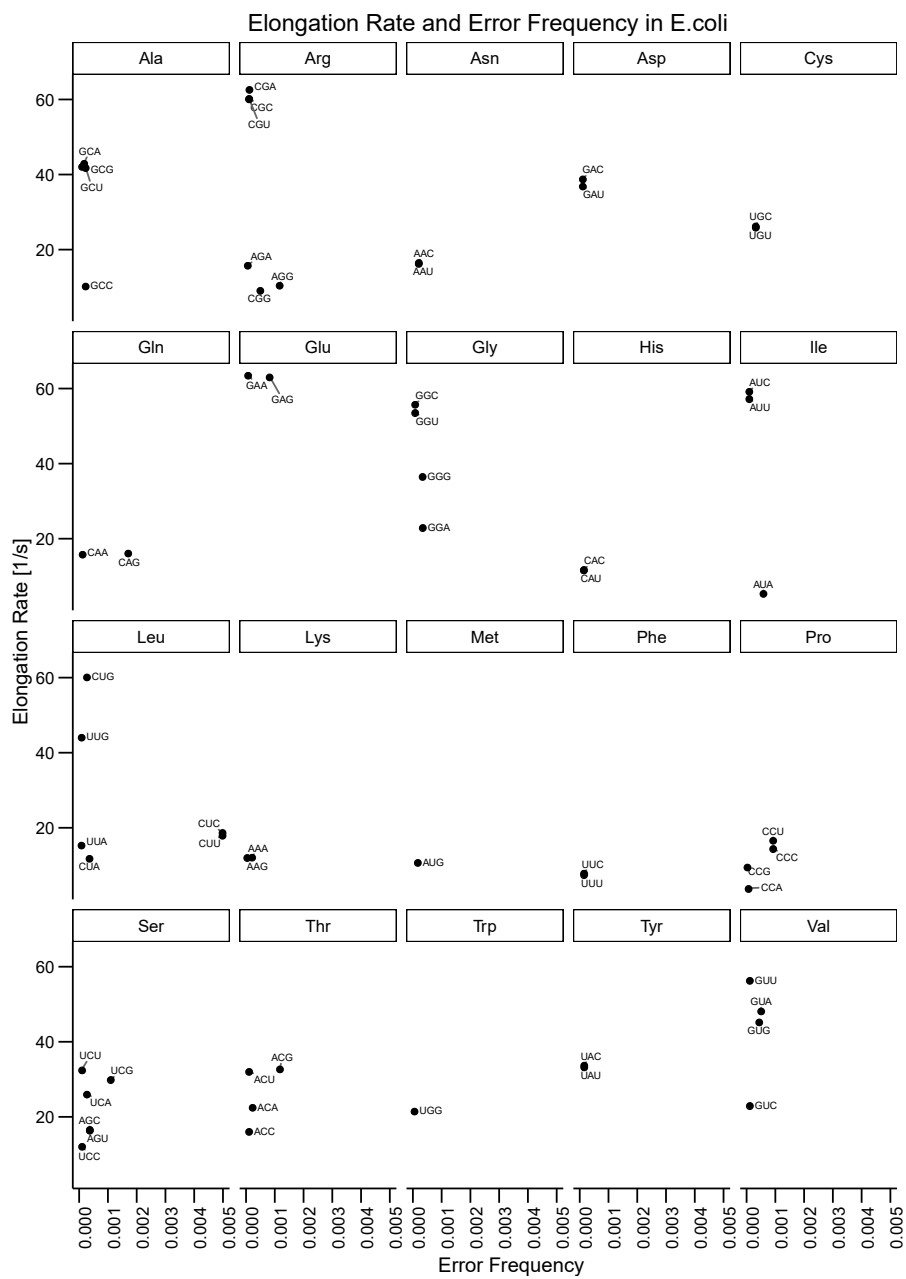

**Figure S3. Elongation rate and error frequencies for *E. coli* at a specific growth rate of  $2.5 \text{ h}^{-1}$ .** In most cases an increase in elongation rate correlates with a decrease in error frequency.

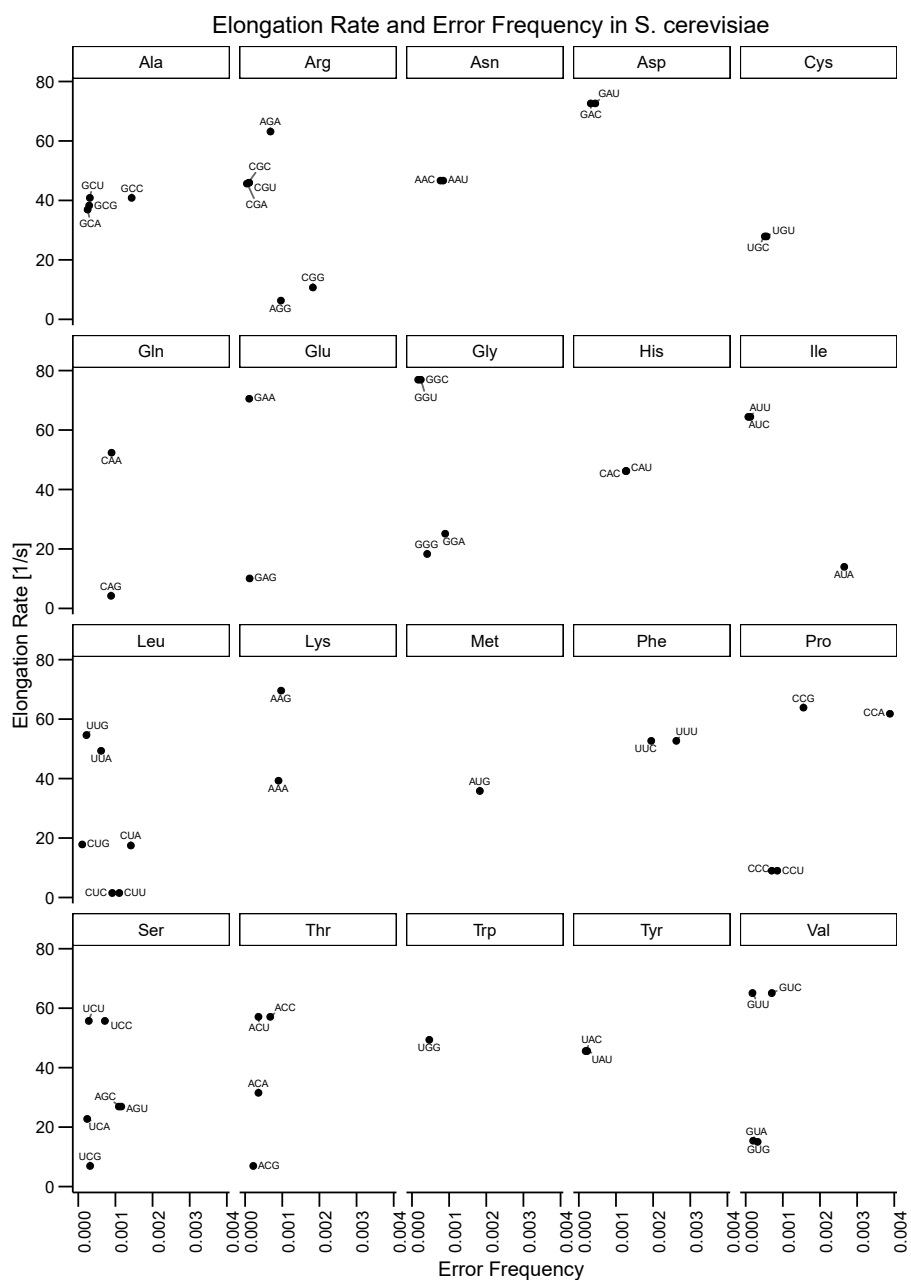

**Figure S4. Elongation rate and error frequencies for *S. cerevisiae*.** In most cases an increase in elongation rate correlates with a decrease in error frequency.

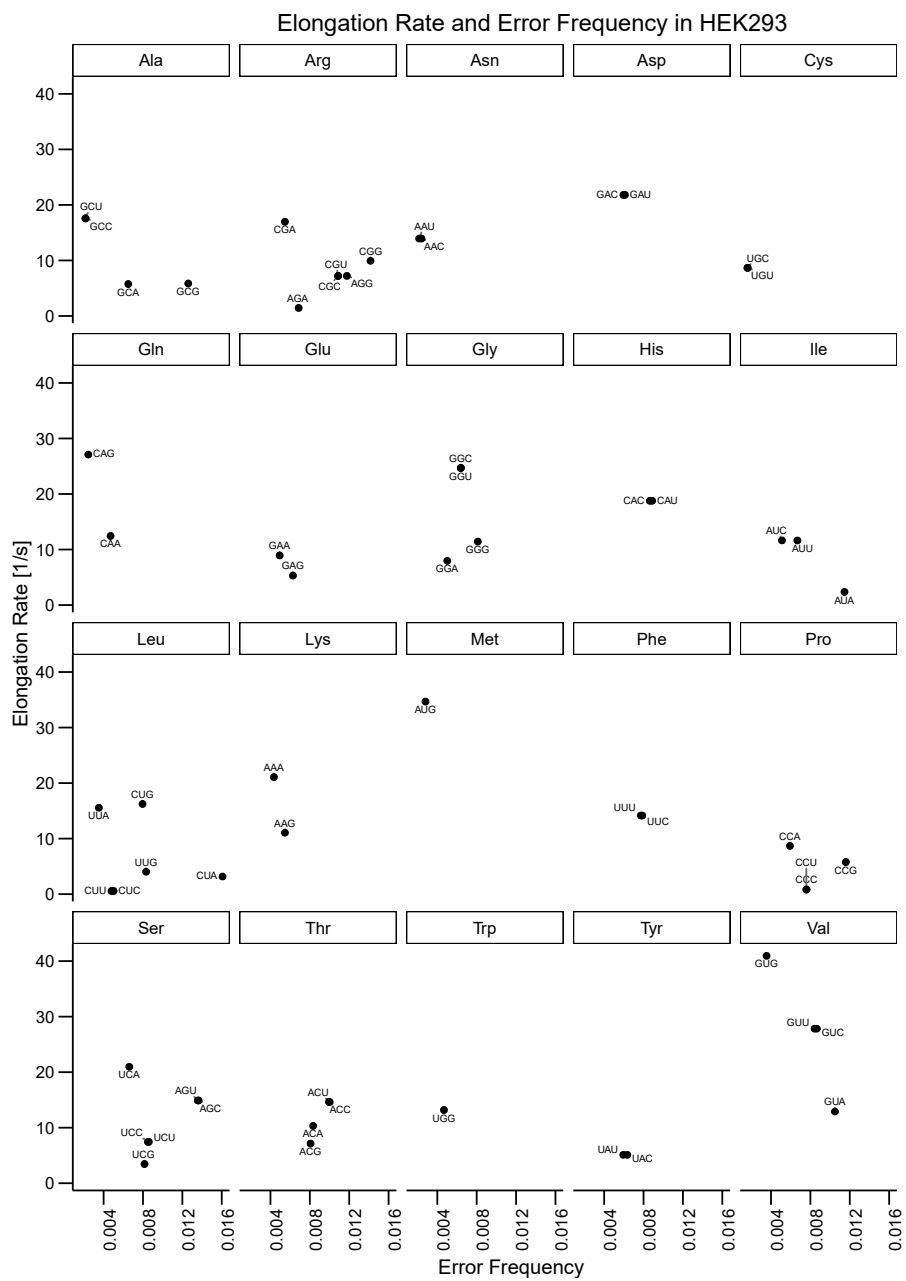

**Figure S5. Elongation rate and error frequencies for HEK293.** In most cases an increase in elongation rate correlates with a decrease in error frequency.

## 2.2 Drop-off and initiation rates

**Table S13. Organism specific drop-off rates.** Drop-off rates were evaluated assuming drop-off probabilities per codon of  $3 \times 10^{-4}$ .

| Organism             | Drop-off prob. per codon                     | Reference | Avg. elongation rate | Drop-off rate                       |
|----------------------|----------------------------------------------|-----------|----------------------|-------------------------------------|
| <i>E. coli</i>       | $2.7 \times 10^{-4}$                         | (17)      | $22 \text{ s}^{-1}$  | $6.6 \times 10^{-3} \text{ s}^{-1}$ |
| <i>E. coli</i>       | $1.4 \times 10^{-4}$ to $5.6 \times 10^{-4}$ | (18)      |                      |                                     |
| <i>S. cerevisiae</i> | $0 \times 10^{-3}$ to $2 \times 10^{-3}$     | (19)      | $33 \text{ s}^{-1}$  | $9.9 \times 10^{-3} \text{ s}^{-1}$ |
| HEK293               |                                              |           | $6 \text{ s}^{-1}$   | $1.8 \times 10^{-3} \text{ s}^{-1}$ |

**Table S14. Initiation rates maximizing the correlation between COSEM current and protein abundance.** Plausible ranges are suggested as there are not always clear optima as can be seen in supplementary Figs. S6 to S8

| Organism             | Optimal [ $\text{s}^{-1}$ ] | Plausible Range [ $\text{s}^{-1}$ ]      |
|----------------------|-----------------------------|------------------------------------------|
| <i>E. coli</i>       | $100 \text{ s}^{-1}$        | $> 10 \text{ s}^{-1}$                    |
| <i>S. cerevisiae</i> | $2.5 \text{ s}^{-1}$        | $1 \text{ s}^{-1}$ to $5 \text{ s}^{-1}$ |
| HEK293               | $0.06 \text{ s}^{-1}$       | $> 0.01 \text{ s}^{-1}$                  |



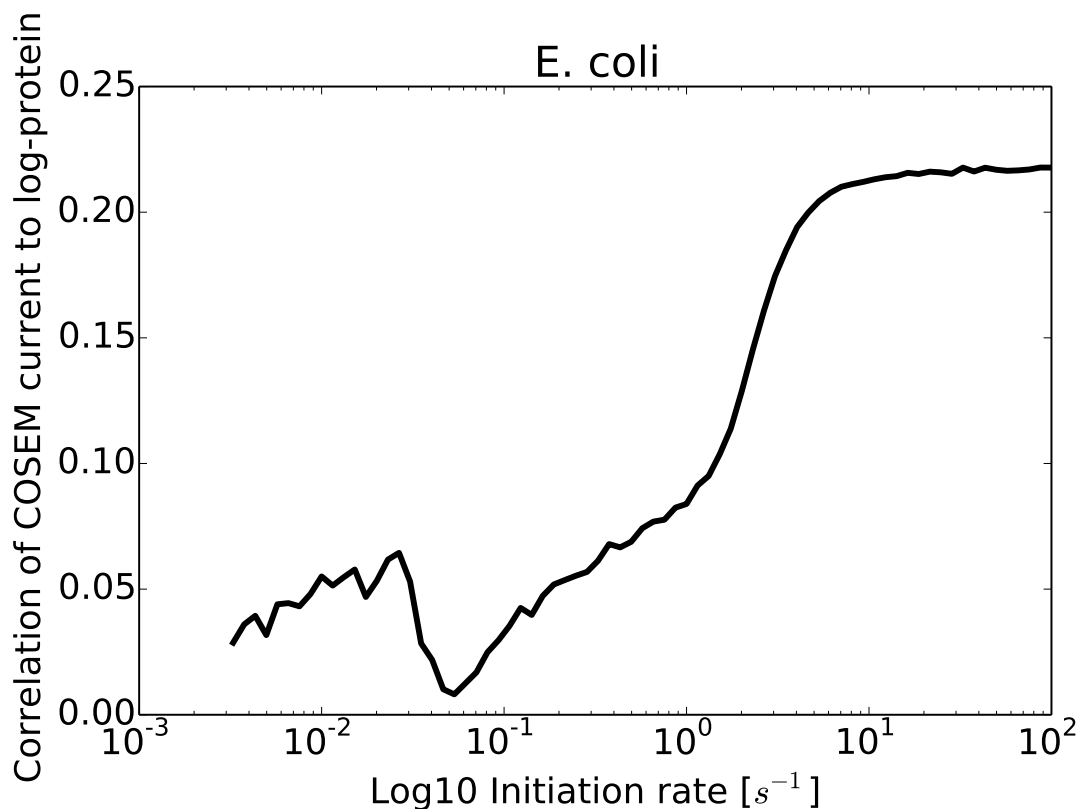

**Figure S6. Correlation of COSEM current with log-protein abundance in *E. coli* genes for different initiation rates.** Since there are little reliable estimates for initiation rates, an alternative is to choose the initiation rate that maximizes the correlation of COSEM current with log-protein abundance to enhance predictability. The simulations were run with the estimated drop-off rate  $6.6 \times 10^{-3} s^{-1}$  and hence, if the initiation rate is lower than the drop-off rate little correlation is expected. For *E. coli* a high initiation rate gives the highest correlation.

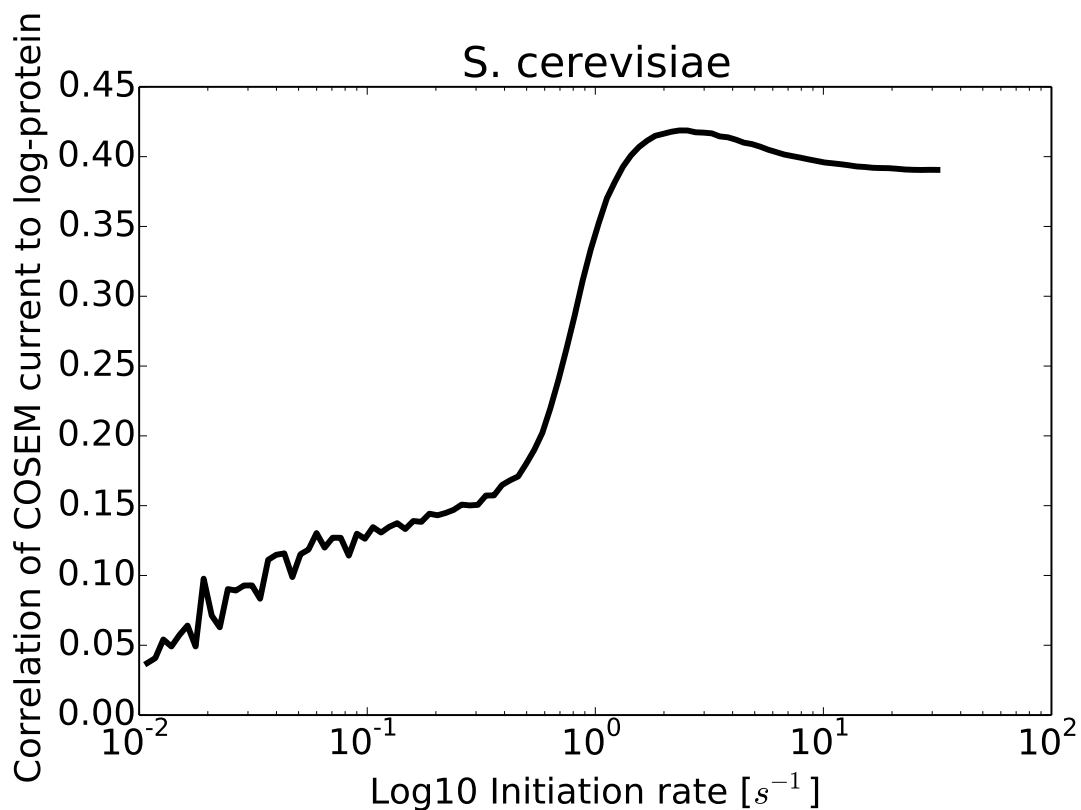

**Figure S7. Correlation of COSEM current with log-protein abundance in *S. cerevisiae* genes for different initiation rates.** Since there are little reliable estimates for initiation rates, an alternative is to choose the initiation rate that maximizes the correlation of COSEM current with log-protein abundance to enhance predictability. The simulations were run with the estimated drop-off rate  $9.9 \times 10^{-3} s^{-1}$  and hence, if the initiation rate is lower than the drop-off rate little correlation is expected.

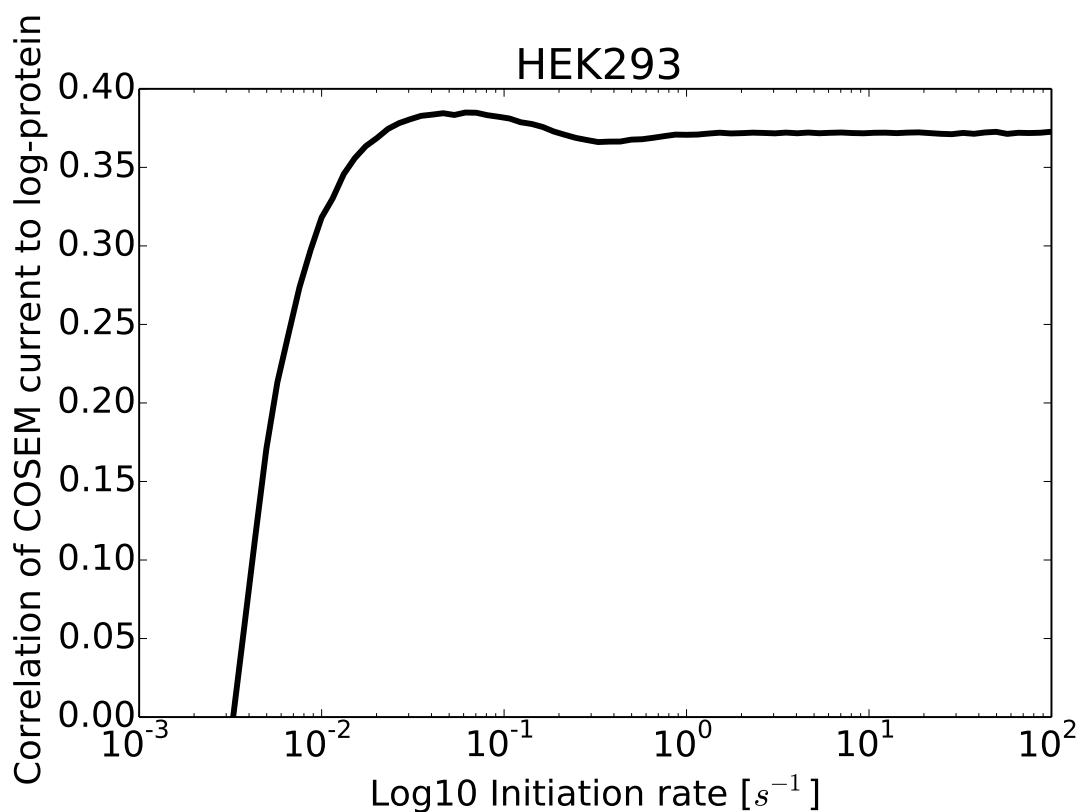

**Figure S8. Correlation of COSEM current with log-protein abundance in HEK293 genes for different initiation rates.** Since there are little reliable estimates for initiation rates, an alternative is to choose the initiation rate that maximizes the correlation of COSEM current with log-protein abundance to enhance predictability. The simulations were run with the estimated drop-off rate  $1.8 \times 10^{-3} s^{-1}$  and hence, if the initiation rate is lower then the drop-off rate little correlation is expected.

## 2.3 Sequence features and function estimates in the protein expression score

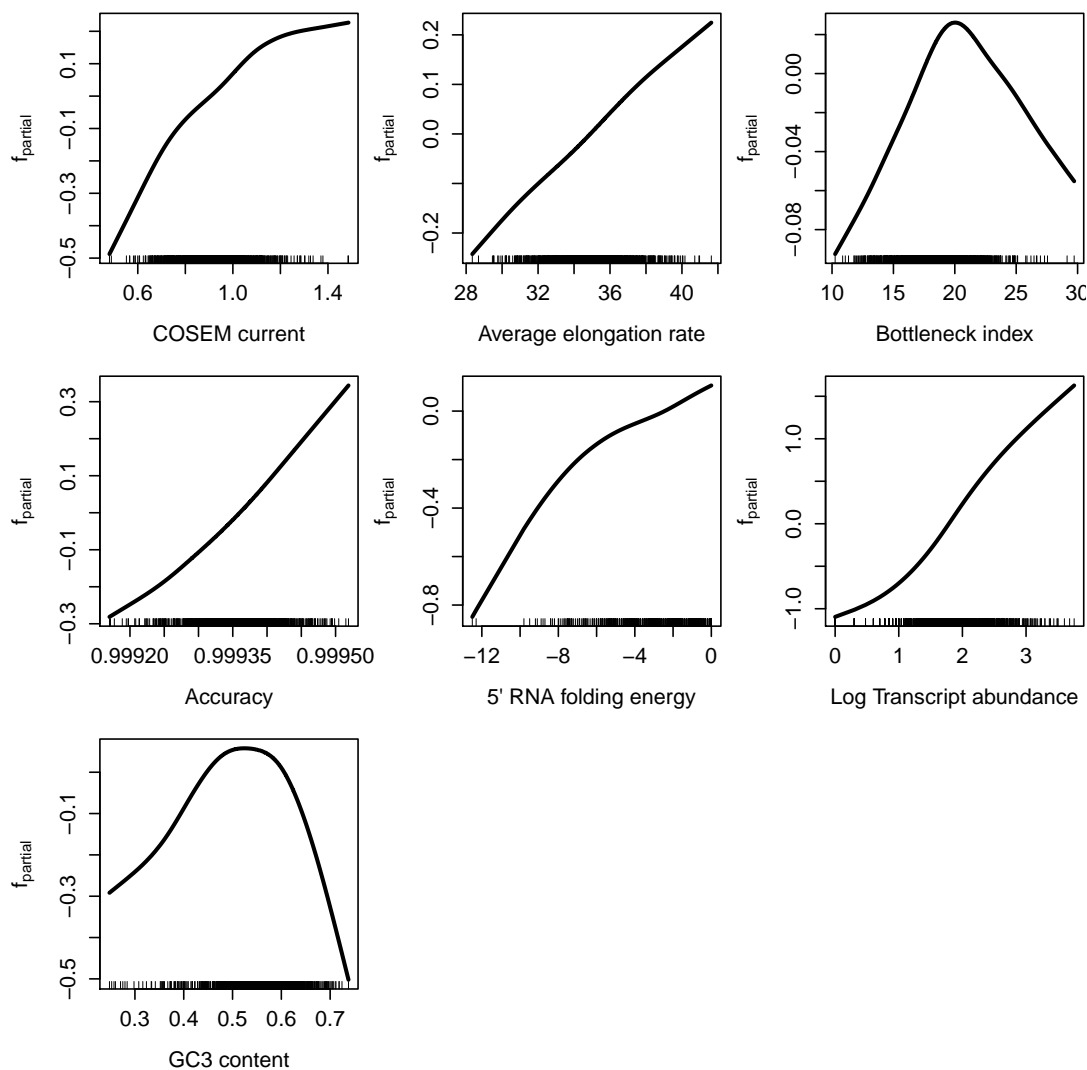

**Figure S9. Function estimates representing features contributing to the protein expression score of *E. coli*.** To estimate protein abundance a generalized additive model with model-based boosting was trained on 70 % of the data set. Monotonicity constraints were used for the COSEM current, average elongation rate and log-transcript abundance. Shown are only sequence features that were selected by the boosting algorithm to improve the prediction of the protein expression score. Generally, the fitted function estimates follow intuition: An increase in protein per time or COSEM current, average elongation rate, bottleneck index (less bottlenecks), accuracy, transcript abundance and folding energy (weaker folding) all contribute to higher expression whereas a balanced GC3 content appears favourable.

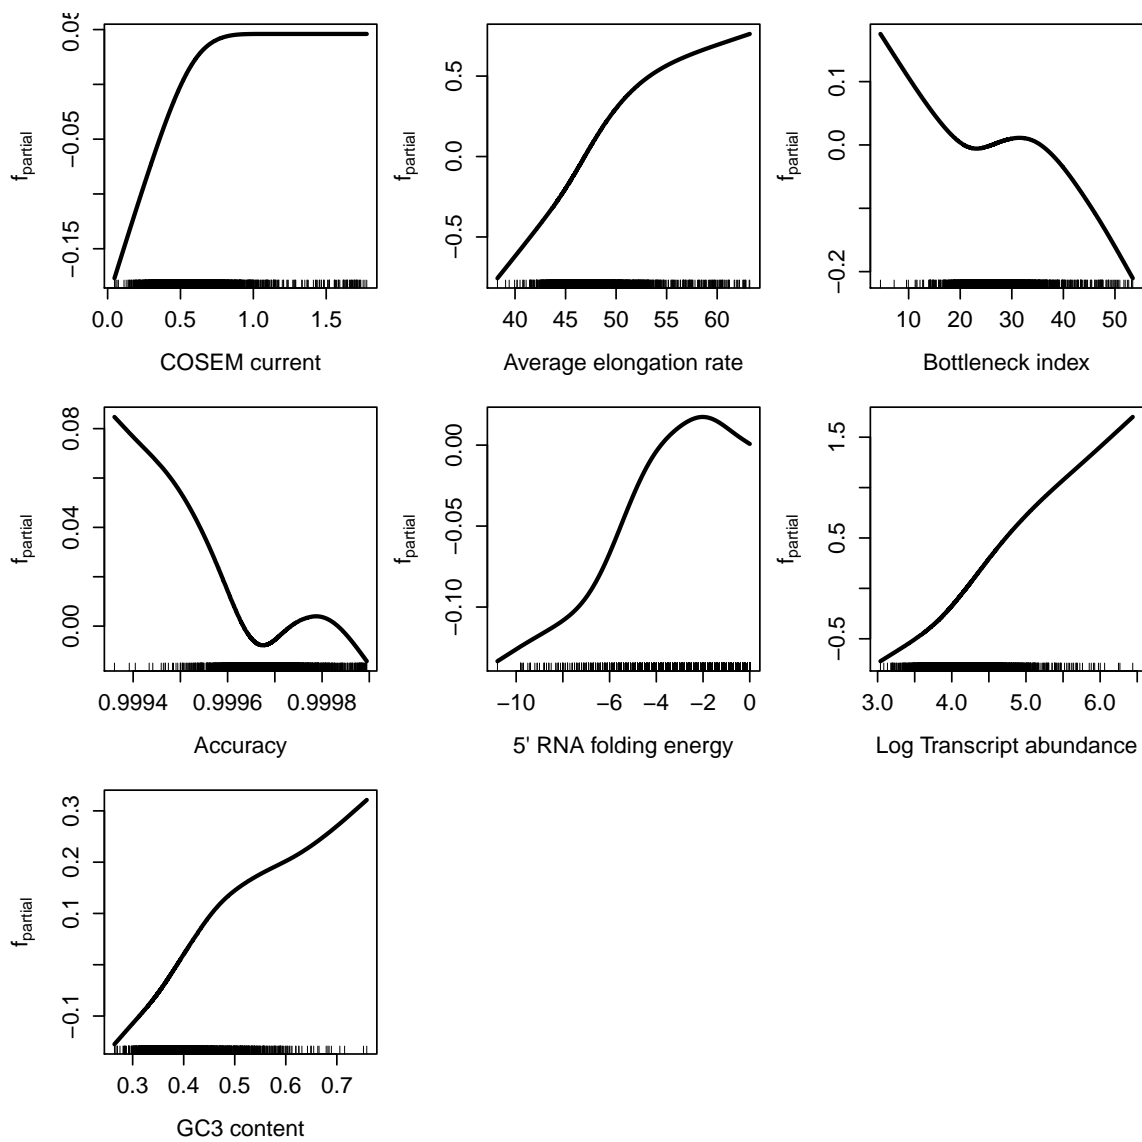

Figure S10. Function estimates representing features contributing to the protein expression score of *S. cerevisiae* as discussed in S9

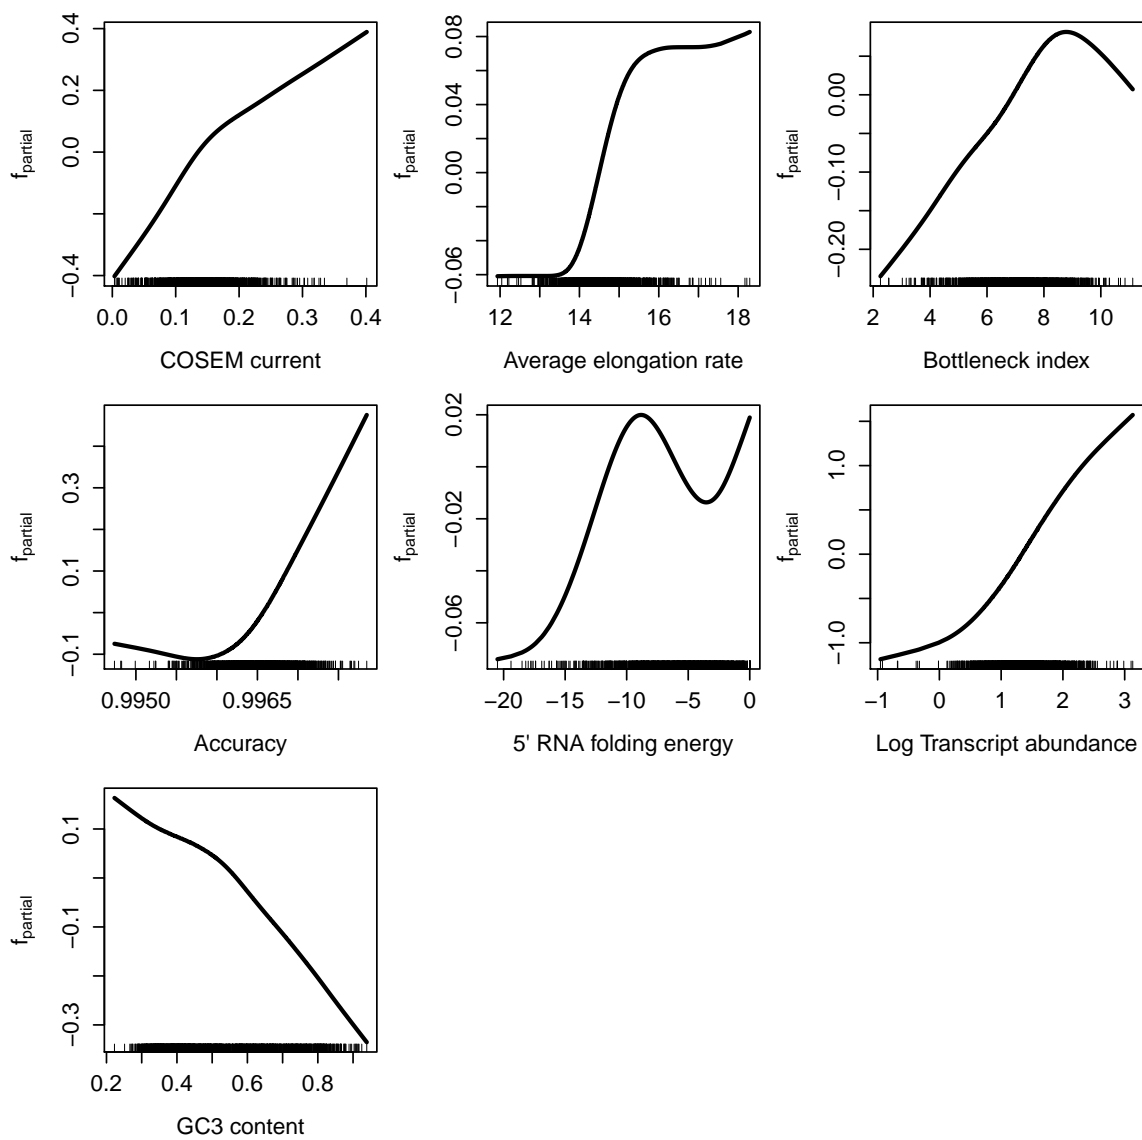

**Figure S11. Function estimates representing features contributing to the protein expression score of HEK293 as discussed in S9**

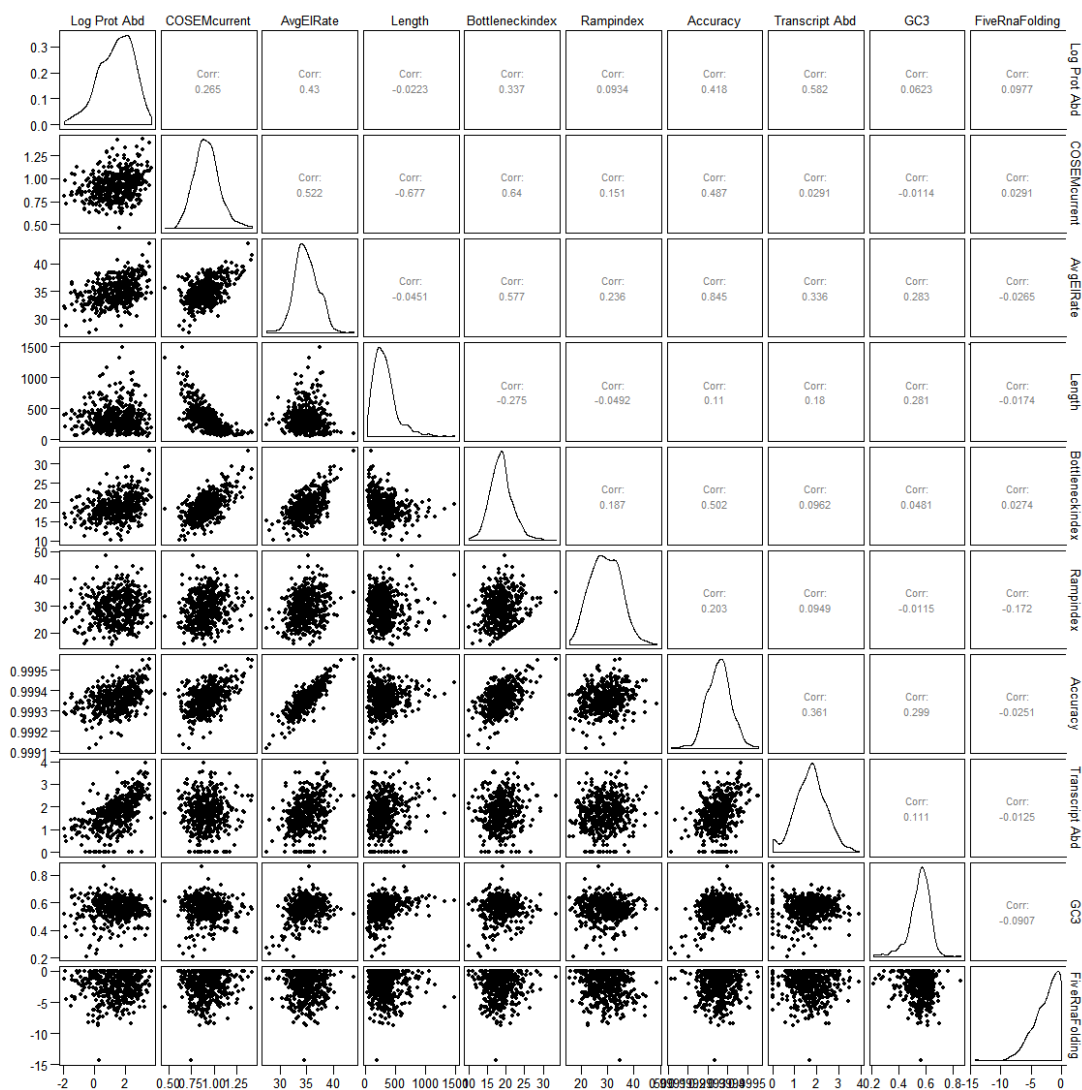

**Figure S12. Correlations in sequence features considered in the protein expression score of *E. coli*.** Measured logarithmic protein abundance and sequence features of *E. coli* genes were plotted pairwise with their Pearson correlation coefficients shown in the upper part of the plot matrix. Note that several features have not been selected by the boosting algorithm to contribute to the protein expression score (ramp index, sequence length, number of hairpins).

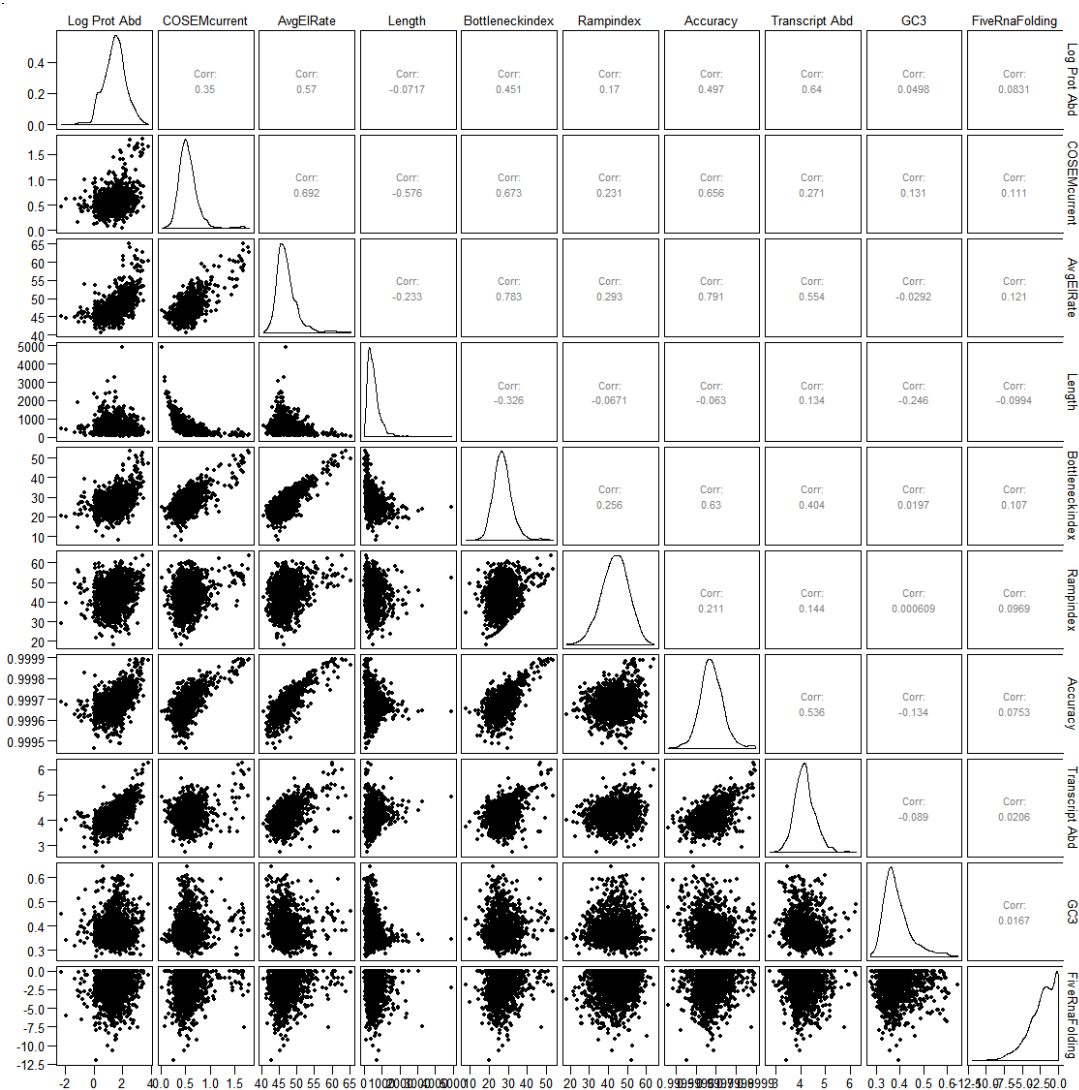

**Figure S13. Correlations in sequence features considered in the protein expression score of *S. cerevisiae*.** Measured logarithmic protein abundance and sequence features of *S. cerevisiae* genes were plotted pairwise with their Pearson correlation coefficients shown in the upper part of the plot matrix. Note that several features have not been selected by the boosting algorithm to contribute to the protein expression score (ramp index, sequence length, number of hairpins).



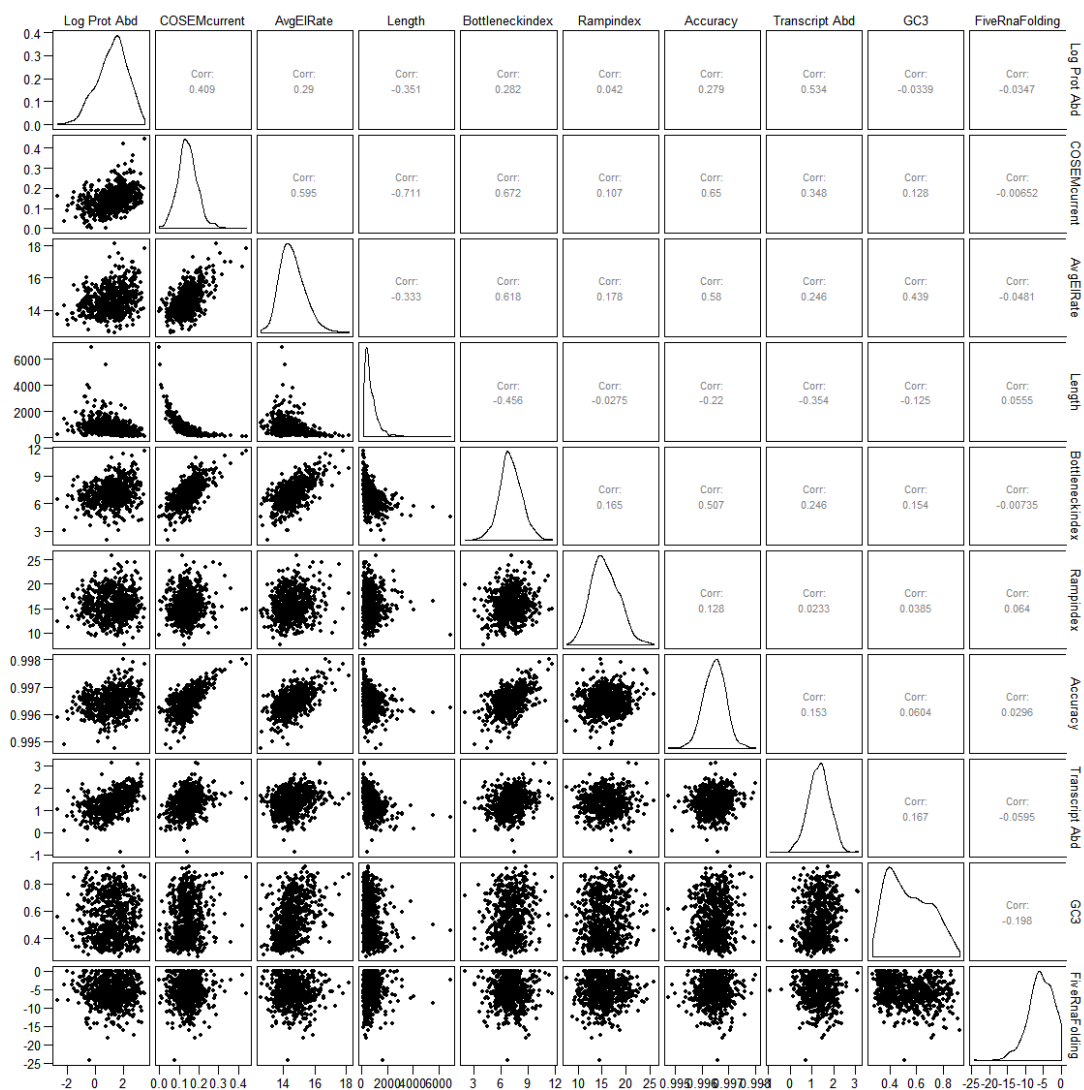

**Figure S14. Correlations in sequence features considered in the protein expression score of human HEK29393 cell lines.** Measured logarithmic protein abundance and sequence features of *S. cerevisiae* genes were plotted pairwise with their Pearson correlation coefficients shown in the upper part of the plot matrix. Note that several features have not been selected by the boosting algorithm to contribute to the protein expression score (ramp index, sequence length, number of hairpins).

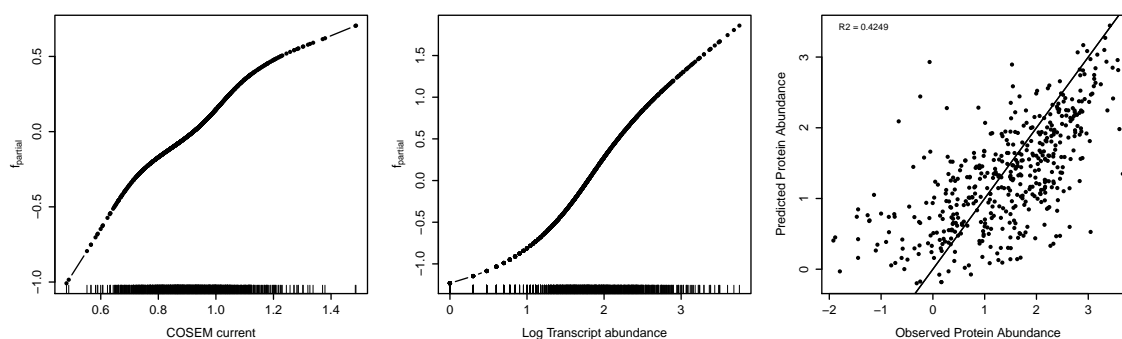

**Figure S15.** (Related to Figure 4) Function estimates and protein expression score against measured protein abundance for a reduced model of *E. coli*. Different from the full protein expression score, here only COSEM current and log-protein abundance were used for prediction resulting in a slightly lower but comparable coefficient of determination showing that these two features already allow for good predictions of protein abundance.

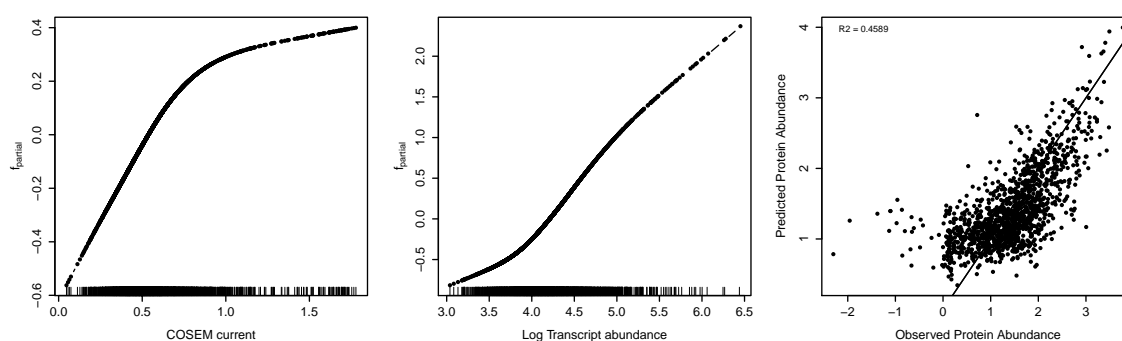

**Figure S16.** (Related to Figure 4) Function estimates and protein expression score against measured protein abundance for a reduced model of *S. cerevisiae* following the lines of S15

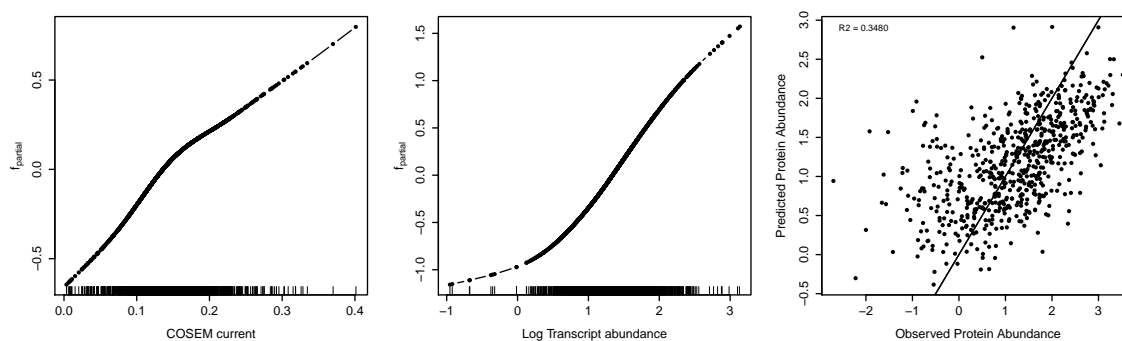

**Figure S17.** (Related to Figure 4) Function estimates and protein expression score against measured protein abundance for a reduced model of HEK293 following the lines of S15

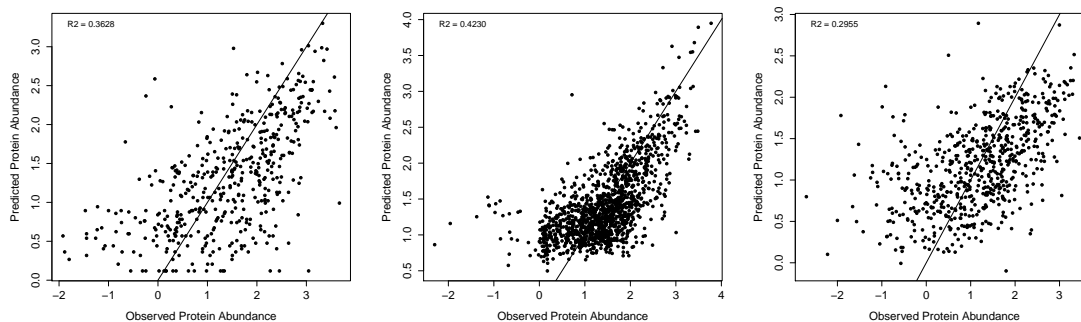

**Figure S18. (Related to Figure 4) Protein expression score against measured protein abundance for reduced models of *E. coli*, *S. cerevisiae* and HEK293 taking only transcript levels into account.** Different from the full protein expression score and the reduced model presented in Figures S15 to S17, here only transcript levels were used for prediction, again resulting in a lower coefficient of determination.

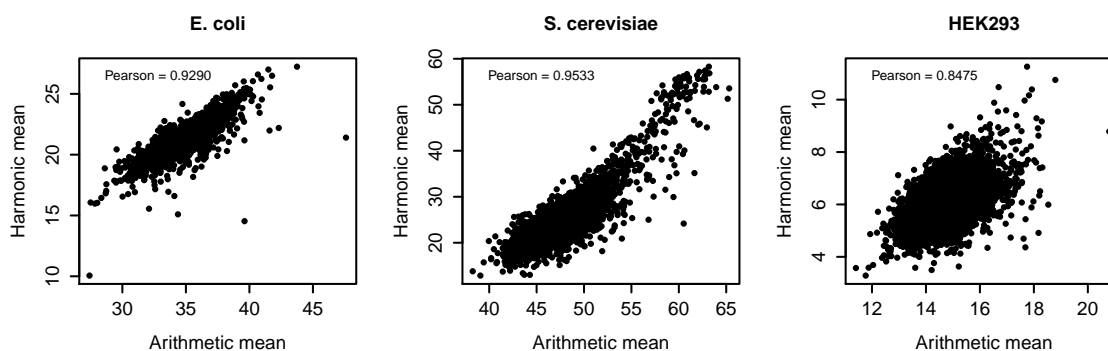

**Figure S19. Harmonic and arithmetic mean of the elongation rates of all *E. coli*, *S. cerevisiae* and HEK293 sequences.** Given a sequence of codons with average individual elongation times  $t_i$  the overall elongation time in the absence of ribosome queueing is, on average,  $\sum_i t_i$ . In terms of rates  $\omega_i$ , the average overall elongation time is  $\sum_i 1/\omega_i$ , i.e. proportional to the inverse of the harmonic mean of elongation rates  $1/(\sum_i 1/\omega_i)$ . However, both, arithmetic and harmonic mean are highly correlated and can be used as predictors for protein abundance.

### 3 Computational and experimental studies with *ova* and *manA* variants

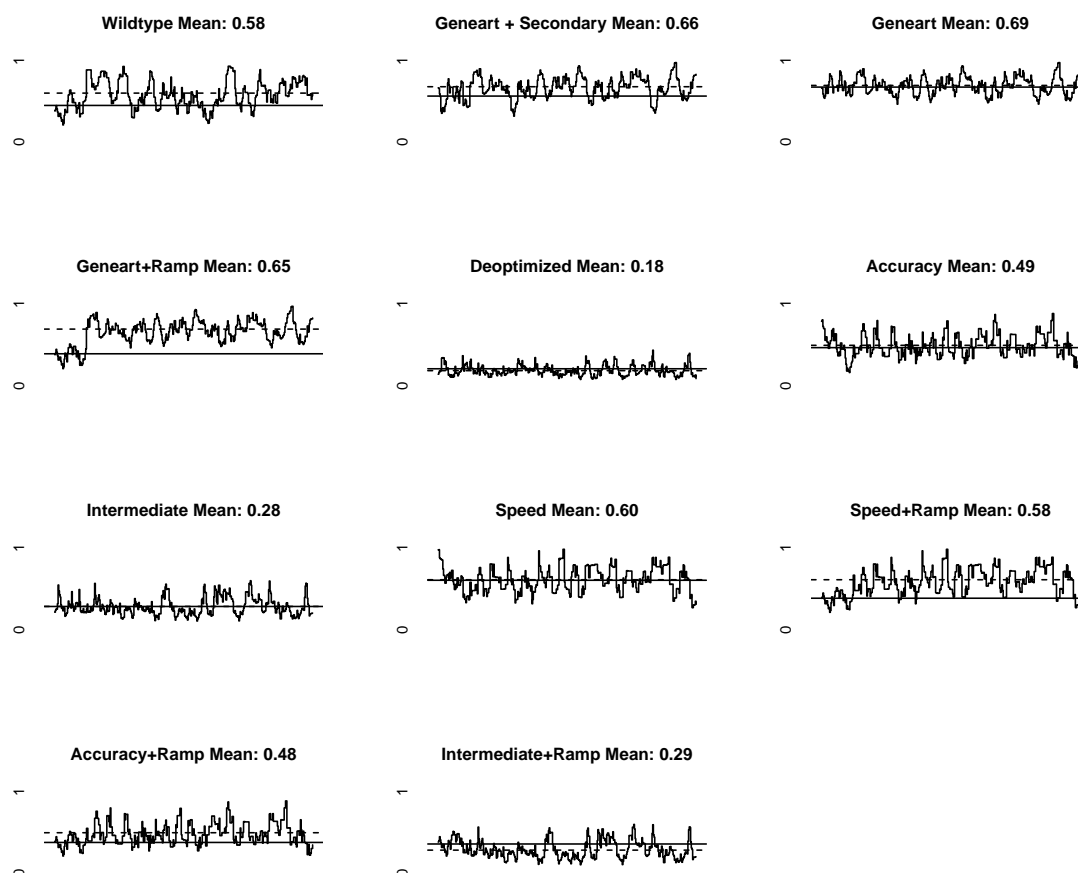

**Figure S20. Rolling mean of codon adaptation index for all *manA* variants of width 10.** Geometric mean of the first 50 codons' CAI is superimposed as solid line and the geometric mean of the rest of the sequences' CAI as dashed line, the sequences mean CAI is given in each panels title. The CAI is calculated with the codon usage of *Salmonella typhimurium* LT2 (2). The wildtype shows an existing ramp with a ratio of 0.83 of average CAI in the first 50 codons compared to the remaining codons. The Accuracy, Intermediate and Speed variants do not distinguish between ramp and non-ramp codons. Thus the ratio is close to 1 (0.91, 1.04, 0.98) in contrast to the variants with ramp and ratios of 0.77, 1.33, 0.63 in which the Intermediate variant has an average CAI that is lower than that of the wildtype and thus lower than the wildtype-ramp leading to a ratio larger than 1. Analysis of the *manA* mRNA sequence profile with respect to CAI and average elongation rate (cf. Figure S21) led us to the conservative approach of keeping a ramp of 50 codons in *manA* variants instead of 30 codons considered otherwise.

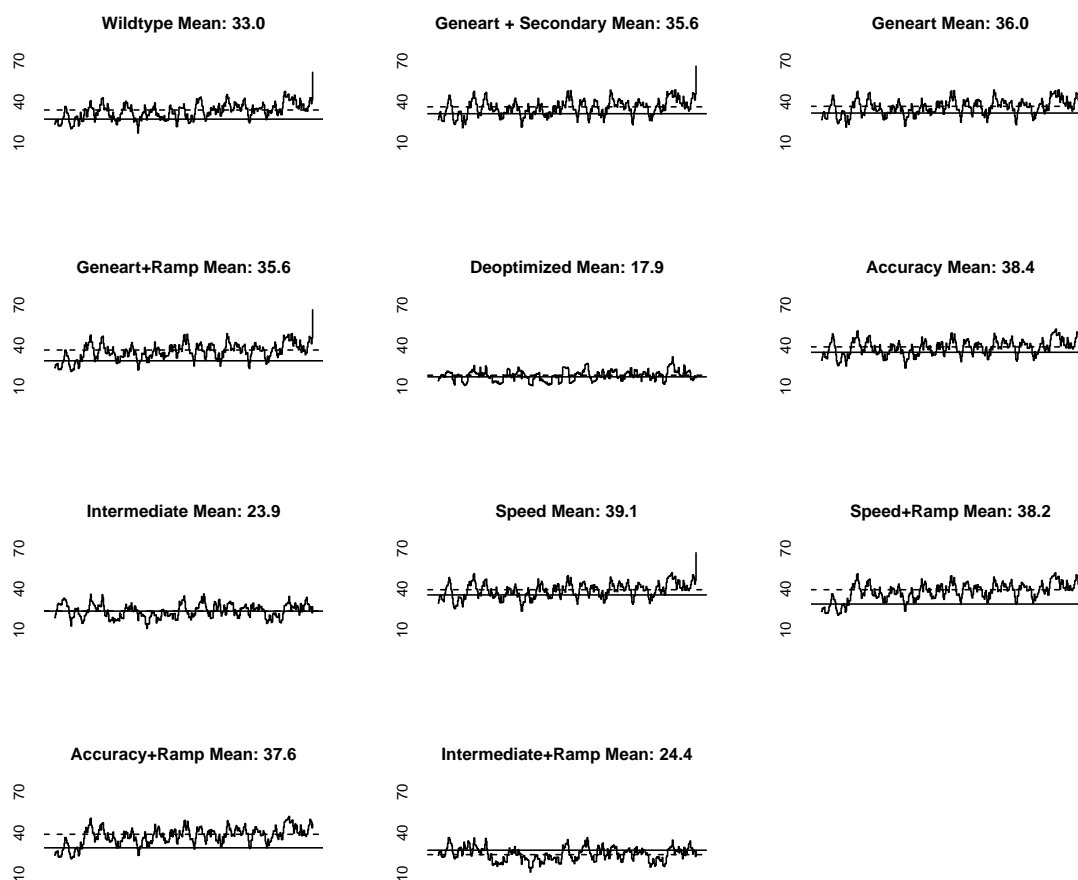

**Figure S21. Rolling mean of average elongation rate for all *manA* variants of width 10.** Mean elongation rate of the first 50 codons is superimposed as solid line, mean elongation rate in the rest of the sequence as dashed line, the sequences' mean elongation rate is given in each panels title (in codons per second). The figure is similar to S20 with one notable difference: Whereas the ratio of CAI of the first 50 codons to the remainder for the Geneart variant is 0.98 and hence showing no relevant ramp-effect, there is a more pronounced difference of 0.86 for the average elongation rate. Analysis of the *manA* mRNA sequence profile with respect to CAI (cf. Figure S20) and average elongation rate led us to the conservative approach of keeping a ramp of 50 codons in *manA* variants instead of 30 codons considered otherwise.

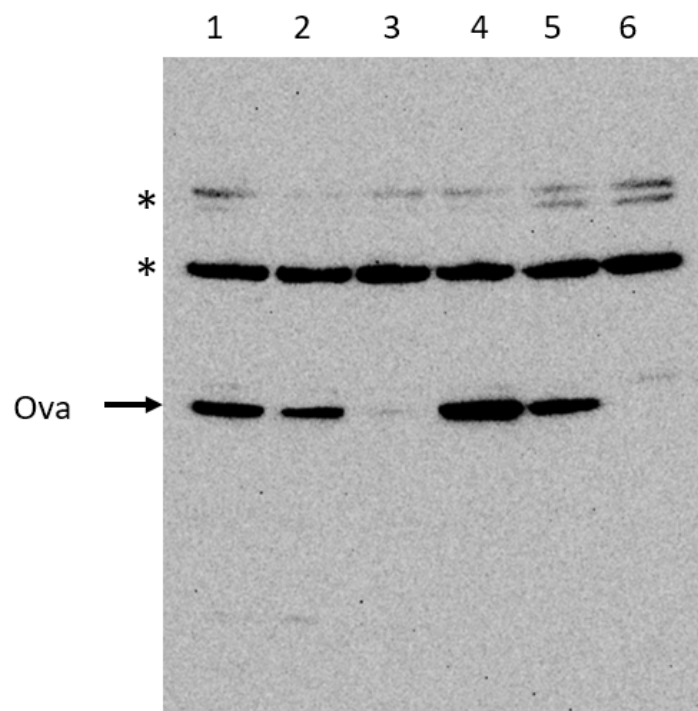

**Figure S22. Ova specific Western blot.** This blot corresponds to data shown in Figures 5, S24-S26. We prepared extracts of *S. Typhimurium* strains expressing variants of *ova* genes (cf. Figure 5, Table S19), i.e. wildtype (1), optimized with Geneart (2), deoptimized (3), optimized (4), intermediate (5), empty vector (6). We subjected 8  $\mu$ l of each extract to analysis as described in the methods section. The figure shows uncropped data derived from one gel, the asterisks indicate unspecific bands.

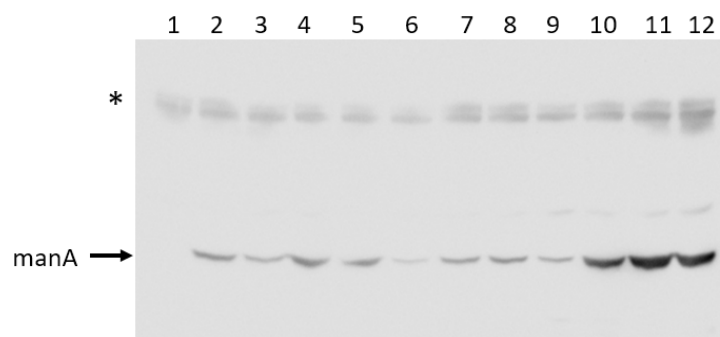

**Figure S23. ManA specific Western blot.** This blot corresponds to data shown in Figures 6, S24-S26. We prepared extracts of *S. Typhimurium* strains expressing *manA* genes (cf. Figure 6, Table S19), i.e. empty vector control (1), wildtype (2), optimized with Geneart with slow codons between secondary structures (3), optimized with Geneart (4), optimized with Geneart conserving ramp (5), deoptimized (6), optimized for accuracy (7), optimized for speed (8), intermediate (9), optimized for accuracy conserving ramp (10), optimized for speed with ramp (11), intermediate conserving ramp (12). We subjected 8  $\mu$ l of each extract to analysis as described in the methods section. The figure shows uncropped data derived from one gel, the asterisks indicates unspecific bands.

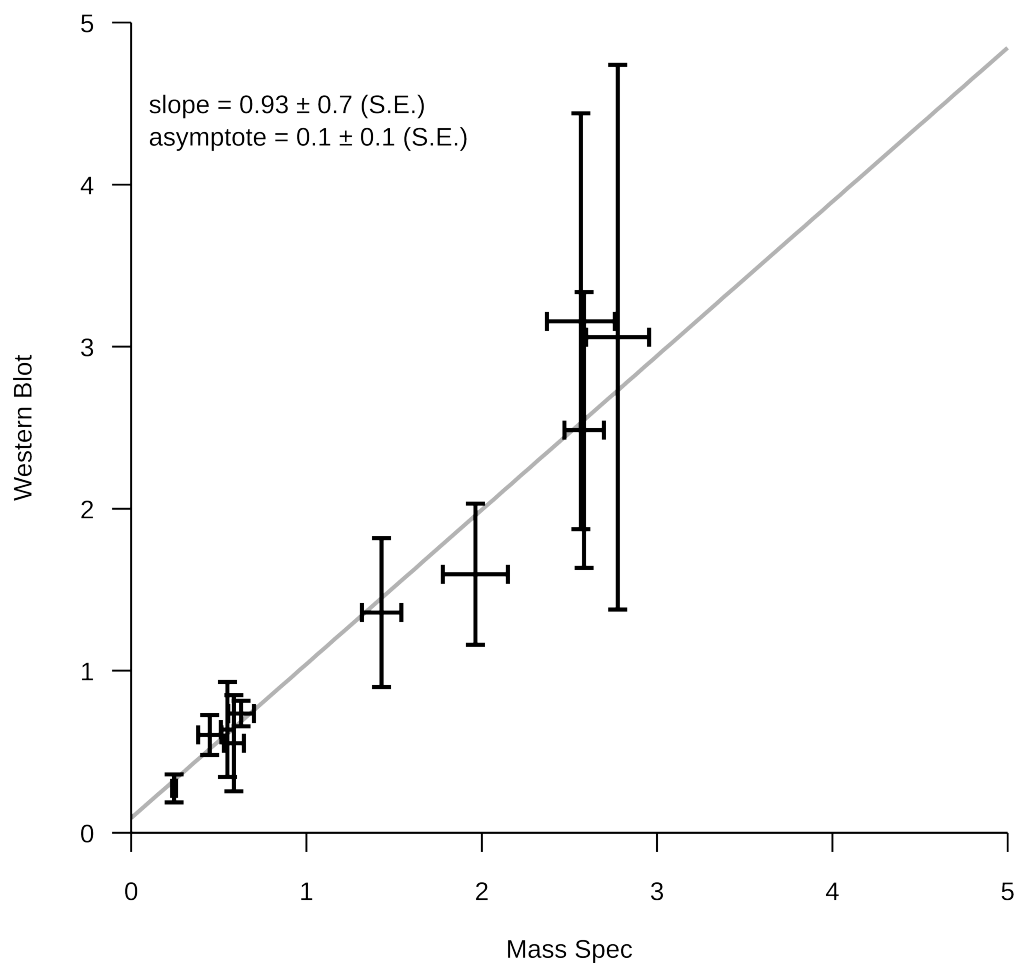

**Figure S24. Comparison of mass spectrometry and Western blot protein abundance measurements.** The figure shows measured protein abundance relative to wildtype with standard deviations for both methods. The linear fit takes into account the respective uncertainties according to Orear's effective variance method. The two measurement methods show very similar results, i.e. slope and asymptote of the linear fit are  $0.93 \pm 0.7$  and  $0.1 \pm 0.1$  and the Pearson's correlation coefficient is 0.97 with a lower and upper confidence interval of 0.8 to 0.99.



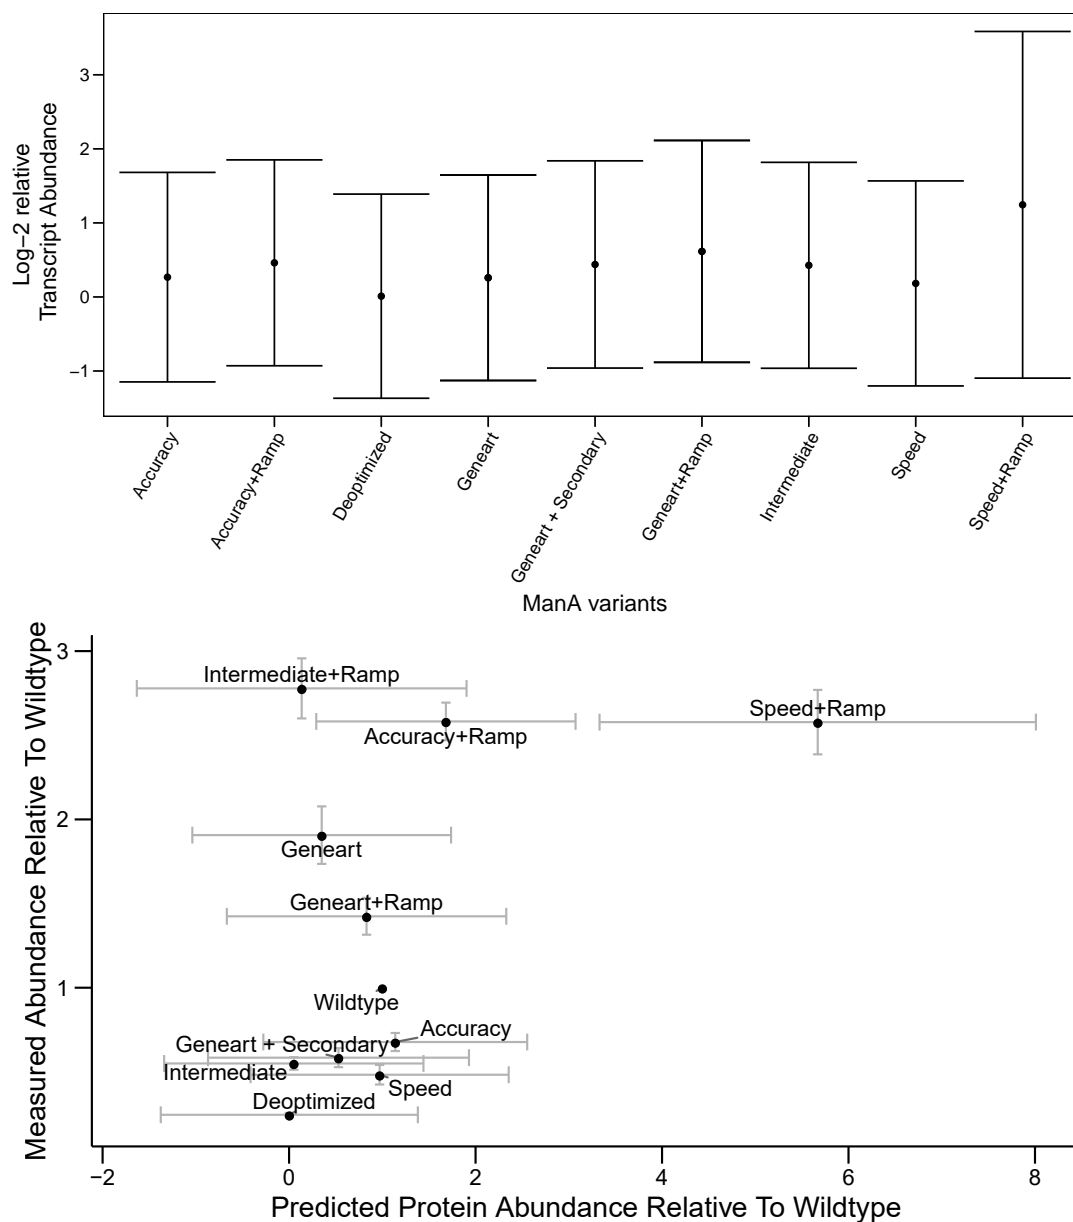

**Figure S25. (Related to Figure 7) Measured and predicted protein abundance taking transcript levels into account.** Top Panel: mRNA transcript levels relative to wild type were determined for *manA* variants by quantitative real-time PCR (3 biological replicates and 3 technical replicates each) and were not significantly different from each other within the errors seen in the qPCR measurements. Bottom Panel: Measured protein abundance relative to wildtype compared to protein expression score relative to wild type for *manA* variants. Protein levels are weighted averages of mass spectrometry measurements (3 biological replicates and 3 digestion replicates each) and Western blots (3–5 replicates each) which correlate well (cf. Supplementary Figure S18). Different from Fig. 6 of the main manuscript mRNA levels were considered in the protein expression score. As transcript levels are not significantly different from each other within the large errors seen in the qPCR measurements their consideration in the protein expression score results in shifts and large error bars in the predicted protein levels without adding information.

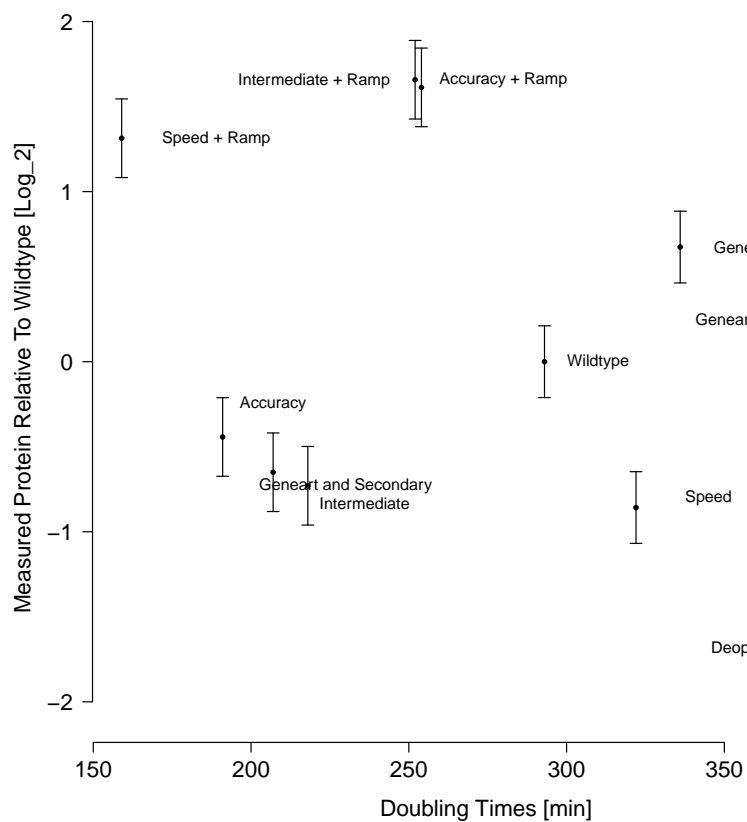

**Figure S26. Protein expression levels relative to wildtype compared to doubling times of *S. Typhimurium* population on minimal mannose medium.** An increase of ManA expression reduces the doubling time and hence increases the growth rate.

## 4 Experimental protocols

### 4.1 Quantification of ManA expression in *S. Typhimurium* lysates by multiple reaction monitoring (MRM)

ManA levels were determined by multiple reaction monitoring (MRM). A ManA specific peptide (YDIPELVANVK) was selected using UniProt P25081 as a template and ordered as stable isotope labelled calibration peptide (SpikeTide TQL, JPT, Berlin, Germany). This peptide carries a tag for quantification that requires trypsin cleavage before MRM analysis. A 1 nmol aliquot of the peptide was reconstituted in 100  $\mu\text{l}$  of 0.1  $\text{NH}_4\text{HCO}_3$  containing 50 % ACN and stored at  $-80^\circ\text{C}$  before usage. Calibration values were obtained by spiking the calibration peptide into 13.53  $\mu\text{l}$  of the lysate of the *manA* deficient *S. Typhimurium* strain. DTT (9.45  $\mu\text{l}$ ,  $c=1.83 \text{ mg ml}^{-1}$ ) was added for reduction of disulfide bonds (15 min at  $60^\circ\text{C}$ ) and iodoacetamide (11.27  $\mu\text{l}$ ,  $c=5.1 \text{ mg ml}^{-1}$ ) for cysteine alkylation (15 min at  $25^\circ\text{C}$ ). Enzymatic digestion (16 h at  $37^\circ\text{C}$ ) was done by adding trypsin (5.05  $\mu\text{l}$ ,  $c=816 \text{ ng } \mu\text{l}^{-1}$ ) and stopped by adding formic acid (5.86  $\mu\text{l}$ , 5 % in water). Final concentrations of the calibration peptide can be found in Table S15.

**Table S15. Final concentrations of the calibration peptide.**

| Concentration calibration peptide [fmol / $\mu\text{l}$ ] | Peptide volume [ $\mu\text{l}$ ] | 50 mmol $\text{NH}_4\text{HCO}_3$ volume [ $\mu\text{l}$ ] |
|-----------------------------------------------------------|----------------------------------|------------------------------------------------------------|
| 25                                                        | 0.151                            | 14.59                                                      |
| 100                                                       | 0.6                              | 14.14                                                      |
| 200                                                       | 1.2                              | 13.45                                                      |
| 400                                                       | 2.4                              | 12.34                                                      |
| 1000                                                      | 6                                | 8.74                                                       |
| 2000                                                      | 12                               | 2.74                                                       |

Calibration samples were digested in triplicates, each replicate was injected once at a volume of 20  $\mu\text{l}$ . A volume of 13.53  $\mu\text{l}$  of the lysates from strains harboring *manA* variants were combined with 2.4  $\mu\text{l}$  calibration peptide, 12.34  $\mu\text{l}$   $\text{NH}_4\text{HCO}_3$  (50 mmol), 9.54  $\mu\text{l}$  DTT, 11.27  $\mu\text{l}$  iodoacetamide, 5.05  $\mu\text{l}$  trypsin, and 5.86  $\mu\text{l}$  formic acid. Time and temperature values for reduction, alkylation and digestion were set as described above. All samples and calibration standards were frozen at  $-80^\circ\text{C}$  once before usage. Each sample was digested in triplicates and each triplicate was injected once at a volume of 20  $\mu\text{l}$ .

For MRM analysis 20  $\mu\text{l}$  of each sample were injected in an ACQUITY-UPLC equipped with an ACQUITY UPLC Peptide BEH C18 column (130  $\text{\AA}$ , 1.7  $\mu\text{m}$ , 2.1 mm  $\times$  100 mm) and an ACQUITY UPLC BEH C18 VanGuard Pre-column (130  $\text{\AA}$ , 1.7  $\mu\text{m}$ , 2.1 mm  $\times$  5 mm) (Waters, Milford, US). A binary solvent system consisting of an aqueous mobile phase (solvent A: water with 0.1 % (v/v) formic acid) and an organic mobile phase (solvent B: acetonitrile with 0.1 % formic acid) was used for the chromatographic separation. All solvents for LC-MS analysis was purchased at Biosolve (Valkenswaard, NL) unless otherwise noted. The elution gradient was 0.5 min, 3 % solvent B, 3 % to 40 % solvent B in 9.5 min, 1 min 40 % solvent B, 40 % to 90 % solvent B in 0.5 min with a constant flow rate of 300  $\mu\text{l min}^{-1}$  and 1.2 min 90 % solvent B, 90 % to 3 % solvent B in 2.3 min with a flow rate of 500  $\mu\text{l min}^{-1}$ .

The triple quadrupole mass spectrometer (Xevo TQ-S, Waters) was operated using MRM in positive ionization mode and scanning for 4 specific transitions of the doubly charged natural peptide YDIPELVANVK ( $\text{MH}^{2+}$   $m/z = 687.82$ ) and the isotopically labelled standard YDIPELVANVK\* ( $\text{MH}^{2+}$   $m/z = 691.39$ ) with the following optimal acquisition parameters: capillary voltage (2.5 kV), cone voltage (21 V), desolvation temperature ( $200^\circ\text{C}$ ), desolvation gas ( $800 \text{ l h}^{-1}$ ), cone gas ( $150 \text{ l h}^{-1}$ ). The dwell time was set to auto and the optimized collision energy for each transition is shown in Table S16.

**Table S16. MRM Transitions and collision energy.**

| Transition  | MS1    | MS2     | F   | CE |
|-------------|--------|---------|-----|----|
| qualifier   | 687.82 | 643.42  | y6  | 29 |
| quantifier  | 687.82 | 869.50  | y8  | 20 |
| qualifier   | 687.82 | 982.60  | y9  | 20 |
| qualifier   | 687.82 | 1097.60 | y10 | 20 |
| qualifier*  | 691.39 | 651.43  | y6  | 29 |
| quantifier* | 691.39 | 877.52  | y8  | 20 |
| qualifier*  | 691.39 | 990.61  | y9  | 20 |
| qualifier*  | 691.39 | 1105.63 | y10 | 20 |

F:Fragment, CE:Collision Energy, \* isotopically labelled.

Data analysis was done using the TargetLynx software (V4.1 SCN810, Waters). The raw data was smoothed before integration with the mean method with width of 2 and 2 iterations. The automatic noise measurement was activated and the peak detection was done with the following values for baseline detection and peak separation: 10 (Balance), 10 (Splitting), 10 (Reduce Tailing), 0.2 (Reduce Height). The quantification of relative protein abundance was done using the peak area of the transition 687.82  $\rightarrow$  869.50 and 691.39  $\rightarrow$  877.52, respectively.

For the different replicates analyzed on different days we used the ratio of unlabeled to labeled peptide as a correction factor and calculated the weighted average of all replicates.

## 4.2 qPCR for quantification of *manA* transcripts

We performed qPCR for quantification of *manA* transcripts. First, mRNA was reverse transcribed to cDNA. Appropriate primers were designed for each *manA* variant and *cam* (cf. table S18). The product sizes were in a range of 88 to 136 bp. Bacteria were cultured in supplemented MM up to an  $OD_{600} \approx 1$  and  $2 \times 10^8$  bacteria were harvested at  $5 \times 10^3 \times g$  for 5 min. RNAprotect Bacteria Reagent and RNeasy Plus Mini Kit were used for purification of RNA (Qiagen). 380 ng RNA of each sample was used for cDNA synthesis employing SuperScript III Reverse Transcriptase (ThermoFisher). qPCR reactions were set up using the iTaq Universal SYBR Green Supermix (Bio-Rad) and were run on a CFX96 thermal cycler (Bio-Rad). Raw-data were analyzed using the CFX Manager Software (Bio-Rad) and  $C_q$  values calculated by thresholding.

For relative quantification of *manA* transcripts primer efficiencies were measured by using a dilution series of *manA* and *cam* transcripts and additionally via sigmoidal curve fitting in R.

## 5 Data retrieval and studied gene sequences

**Table S17. Data sources for protein expression and mRNA transcript levels.** Data sets for protein abundance from PaxDb (5) are provided in the database’s common abundance metric in parts per million (ppm) for the human HEK293 cell line, *E. coli* and *S. cerevisiae*. Transcript abundance was estimated from RNA-seq experiments in which FPKM (number of Fragments Per Kilobase of transcript per Million mapped reads in an RNA-Seq experiment) was taken as a proxy for transcript abundance. For model based boosting log-transformed data were used. Latest date of retrieval was 2016/07/21.

| Data                            | Source                                                                                                                                                                                        |
|---------------------------------|-----------------------------------------------------------------------------------------------------------------------------------------------------------------------------------------------|
| HEK 293 Protein                 | <a href="https://pax-db.org/dataset/9606/329/">https://pax-db.org/dataset/9606/329/</a>                                                                                                       |
| HEK 293 Transcript              | <a href="https://www.ncbi.nlm.nih.gov/geo/query/acc.cgi?acc=GSE38356">https://www.ncbi.nlm.nih.gov/geo/query/acc.cgi?acc=GSE38356</a>                                                         |
| <i>E. coli</i> Protein          | <a href="http://pax-db.org/downloads/latest/datasets/511145/511145-WHOLE_ORGANISM-integrated.txt">http://pax-db.org/downloads/latest/datasets/511145/511145-WHOLE_ORGANISM-integrated.txt</a> |
| <i>E. coli</i> Transcript       | <a href="https://www.ncbi.nlm.nih.gov/geo/query/acc.cgi?acc=GSM533304">https://www.ncbi.nlm.nih.gov/geo/query/acc.cgi?acc=GSM533304</a>                                                       |
| <i>S. cerevisiae</i> Protein    | <a href="http://pax-db.org/downloads/4.0/datasets/4932/4932-WHOLE_ORGANISM-integrated.txt">http://pax-db.org/downloads/4.0/datasets/4932/4932-WHOLE_ORGANISM-integrated.txt</a>               |
| <i>S. cerevisiae</i> Transcript | <a href="https://www.ncbi.nlm.nih.gov/geo/query/acc.cgi?acc=GSM1557444">https://www.ncbi.nlm.nih.gov/geo/query/acc.cgi?acc=GSM1557444</a>                                                     |

**Table S18.** Ologinucleotides used.

| Name  | Target                            | 5’-3’ sequence                                                             |
|-------|-----------------------------------|----------------------------------------------------------------------------|
| oHL20 | kan of pKD4                       | GCCTGCTTGCCGAATATC                                                         |
| oJT1  | pKD4                              | ATGCAAAAACATTAACCTCAGTGCA<br>AAACTATGCCTGGGTGTGTAGGCTGG<br>AGCTGCTTC       |
| oJT2  | pKD4                              | CTACAGCTTGTTATAAACACGCGCTA<br>AACGGCCCGTGCCGCTGGCGCATATG<br>AATATCCTCCTTAG |
| oJT4  | downstream region of genomic manA | GAAACCAGGCGGATTAACC                                                        |
| oJT7  | wt manA cloning                   | GGATATCATATGCAAAAACATTAAC<br>CTCAG                                         |
| oJT8  | wt manA cloning                   | GGATATCACTAGTCTACAGCTTGTTA<br>TAAACACG                                     |
| oJT11 | cam                               | TCCGGCCTTTATTACATTC                                                        |
| oJT12 | cam                               | CGTTTCAGTTTGCTCATGGA                                                       |
| oJT13 | manA promoter                     | CCTCCCATTTGATCTCCACAT                                                      |
| oJT14 | manA2                             | GGTCAGTGCGGTTTTGCTAC                                                       |
| oJT16 | manA3, 8, 9, 10                   | GATTGGCGATGCCATAAAGT                                                       |
| oJT17 | wt manA                           | ATTGGCGATGCCATAAAGTT                                                       |
| oJT21 | manA                              | GTTTTAGAGCCCCATGCGTA                                                       |
| oJT23 | manA5                             | GTTTGCGATGCCGTACAGTT                                                       |
| oJT24 | manA6                             | GGGTTGGCTATACCGTACAA                                                       |
| oJT27 | manA1                             | CCATACAGTTCGGTCAGTGC                                                       |
| oJT28 | manA4                             | TGGTTGTTGTTGTGGATTGG                                                       |

**Table S19. List of all sequences used.** The table lists internal ids for documentation purposes (plasmid, name, gid, DNA, GK), alternate long names and coding sequences.

| Plasmid            | gid     | name          | DNA        | GK         | Long name | Alternate name | CDS                                                                                                                                                                                                                                                                                                                                                                                                                                                                                                                                                                                                                                                                                                                                                                                                                                                                                                                                                                                                                                                                                                                                                                                                                                                                                                                                                                 |
|--------------------|---------|---------------|------------|------------|-----------|----------------|---------------------------------------------------------------------------------------------------------------------------------------------------------------------------------------------------------------------------------------------------------------------------------------------------------------------------------------------------------------------------------------------------------------------------------------------------------------------------------------------------------------------------------------------------------------------------------------------------------------------------------------------------------------------------------------------------------------------------------------------------------------------------------------------------------------------------------------------------------------------------------------------------------------------------------------------------------------------------------------------------------------------------------------------------------------------------------------------------------------------------------------------------------------------------------------------------------------------------------------------------------------------------------------------------------------------------------------------------------------------|
| pETcoco-I<br>pJT6a | 0<br>wt | w/o<br>manAwt | 375<br>685 | 393<br>397 | manA_orig | Wildtype       | ATGCAAAAACTCATTAACCTCAGTGCAAAAACATG<br>CCTGGGGAAGTAAAACCTGCGTTAACGGAACCTT<br>ATGGCATCGCCAATCCGCAGCAGCAGCCAATGG<br>CTGAACTCTGGATGGGCGCGCATCCCAAAAGCA<br>GCTCGGGAATCACCACCGCCAACGGCGAAACCG<br>TCTCCCTGCGTGACGCCATCGAAAAGAATAAAA<br>CCGCCATGCTGGGCGAAGCGGTAGCCAACCGTT<br>TCGGCGAACTGCCGTTTCTGTTTAAAGTACTGT<br>GCGCCGCAACAACCGCTCTCTATTCAGGTGCACC<br>CGAATAAACGCAACTCCGAAATCGGTTTCGCGA<br>AAGAAAATGCGGCGGGTATCCCCATGGATGCCG<br>CAGAGCGGAACATATAAAGATCCTAACCATAAA<br>CAGAGCTGGTTTTTGGCCCTGACGCCTTTCCTGG<br>CGATGAACGCGTTCCGCGAATTTTCTGACATTG<br>TCTCTTACTGCAACCTGTCGCCGCGCGCATTG<br>CGCTATCGCCCACTTTTTGCAGGTGCCGAATGCT<br>GAACGCTCTGAGCCAGCTTTTCGCCAGCCTGTTG<br>AATATGCAAGGCGAAGAAAAATCCCGCGCGTTA<br>GCCGTACTCAAAGCGGCGCTTAACAGCCAGCAA<br>GGCGAACCGTGGCAAACGATCCGCGTGATTTCA<br>GAGTATTATCTGACGACAGCGGGCTTTCTCTC<br>CTTTGTGCTGAATGTGGTCAAACCTGAATCCCG<br>GCGAGGCGATGTTCCCTGTTTGTGAAACGCCTC<br>ATGCTTATCTGCAGGGCGTTGCGCTGGAAGTCA<br>TGGCGAACTCCGATAACGTTCTGCGCGCTGGCC<br>TTACGCCAAAATATATCGACATCCCTGAGCTGGT<br>CGCGAACGTGAAGTTCGAACCTAAGCCTGCCGG<br>CGAGTTGCTGACTGCCCGGTGAAAAGCGGCGC<br>GGAGCTGGACTTCCCAATTCCGGTTGACGATTT<br>TGCTTTTTACTGCACGACCTGGCGCTTCAGGA<br>GACGAGCATCGGCCAACACAGCGCCGCGATTCT<br>GTTCTGCGTTGAGGGTGAGGCGGTGTTACGTAA<br>AGATGAACAGCGTCTGGTACTGAAGCCGGGTGA<br>ATCTGCCTTTATCGGCGCGGATGAGTCTCCGGT<br>TAACGCCAGCGGCACGGGCCGTTTAGCGCGTGT<br>TTATAACAAGCTGTAG |

**Table S19.** All sequences used cont.

| Plasmid | gid | name  | DNA | GK  | Long name                          | Alternate name         | CDS                                                                                                                                                                                                                                                                                                                                                                                                                                                                                                                                                                                                                                                                                                                                                                                                                                                                                                                                                                                                                                                                                                                                                                                                                                                                                                                                                                       |
|---------|-----|-------|-----|-----|------------------------------------|------------------------|---------------------------------------------------------------------------------------------------------------------------------------------------------------------------------------------------------------------------------------------------------------------------------------------------------------------------------------------------------------------------------------------------------------------------------------------------------------------------------------------------------------------------------------------------------------------------------------------------------------------------------------------------------------------------------------------------------------------------------------------------------------------------------------------------------------------------------------------------------------------------------------------------------------------------------------------------------------------------------------------------------------------------------------------------------------------------------------------------------------------------------------------------------------------------------------------------------------------------------------------------------------------------------------------------------------------------------------------------------------------------|
| pJT7a   | 1   | manA1 | 680 | 531 | manA_opt_and_slow_before_secondary | Geneart +<br>Secondary | ATGCAGAAACTGATTAATAGCGTGCAGAATTAT<br>GCATGGGGATCGAAAACCGCACTGACCGAACTG<br>TATGGTATTGCAAATCCGCAGCAGCAGCCAATG<br>GCAGAACTGTGGATGGGTGCACATCCGAAAAGC<br>AGCTCCCGAATTACCACCGCAAATGGTGAAACC<br>GTTAGCCTGCGTGATGCAATCGAAAAAACAAA<br>ACCGCCATGCTGGGTGAAGCAGTTGCAAATCGT<br>TTTGGTGAAC TGCCGTTTCTGTTAAAGTTCTGT<br>GTGCAGCACAGCCGCTGAGCATT CAGGTTTCATC<br>CGAATAAACGTAATAGCGAAATTGGCTTTGCCA<br>AAGAAAATGCAGCAGGTATTTCCCATGGATGCAG<br>CAGAACGTA ACTATAAAGATCCGAATCATAAAC<br>AGA ACTGGTTTTTGC ACTGACCCGTTTTCTGGC<br>AATGAATGCATTTCTGTGAATTTAGCGATATTGT<br>GAGCCTGCTGCAGCCGTTGCCGTTGCCATAG<br>CGCAATTGCACATTTTCTGCAGTTCCGAATGCC<br>GAACGTCTGAGCCAGCTGTTTGCAAGCCTGCTG<br>AATATGCAGGGTGAAGAAAAAGCCGTGCACTG<br>GCAGTTCTGAAAGCAGCACTGAATAGCCAGCAG<br>GGCGAACCGTGGCAGACCATTCTGTATTATTAGC<br>GAATATTATCCGGATGATAGCGGTCTTTTTAGC<br>CCTCTGCTGCTGAATGTTGTTAAACTGAATCCG<br>GGTGAAGCCATGTTTCTGTTCCGAGAAACACCG<br>CATGCTTATCTGCAGGGTGTTCACCTGGAAGTT<br>ATGGCAAATAGCGATAATGTTCTGCGTGCAGGT<br>CTGACCCCGAAAATACATTGATATTCCAGA ACTGG<br>TTGCCAACGTGAAATTTGAACCGAAACCGGCAG<br>CGAACCTGCTGACCGCACCGGTTAAAAGCGGTG<br>CAGAACTGGATTTTCCGATTTCCGGTGGATGATT<br>TTGCATTTAGTTTGCATGATCTGGCACTGCAAG<br>AAACCAGCATTGGTCAGCATAGCGCAGCAATTC<br>TGTTTTGTGTTGAAGGTGAAGCCGTTCTGCGTA<br>AAGATGAACAGCGTCTGGTTCTGAAACCTGGTG<br>AAAGCGCATTTATTGGTGCAGATGAAAGTCCGG<br>TTAATGCAAGCGGCACCGTCTGCTGCGCACGTG<br>TTTATAACAAACTGTAA |

**Table S19.** All sequences used cont.

| Plasmid | gid | name  | DNA | GK  | Long name       | Alternate name | CDS                                                                                                                                                                                                                                                                                                                                                                                                                                                                                                                                                                                                                                                                                                                                                                                                                                                                                                                                                                                                                                                                                                                                                                                                                                                                                                                                                             |
|---------|-----|-------|-----|-----|-----------------|----------------|-----------------------------------------------------------------------------------------------------------------------------------------------------------------------------------------------------------------------------------------------------------------------------------------------------------------------------------------------------------------------------------------------------------------------------------------------------------------------------------------------------------------------------------------------------------------------------------------------------------------------------------------------------------------------------------------------------------------------------------------------------------------------------------------------------------------------------------------------------------------------------------------------------------------------------------------------------------------------------------------------------------------------------------------------------------------------------------------------------------------------------------------------------------------------------------------------------------------------------------------------------------------------------------------------------------------------------------------------------------------|
| pJT8a   | 2   | manA2 | 678 | 532 | man_opt_geneart | Geneart        | ATGCAGAAACTGATTAATAGCGTGCAGAATTAT<br>GCATGGGGTAGCAAAACCGCACTGACCGAACTG<br>TATGGTATTGCAAATCCGCAGCAGCAGCCGATG<br>GCAGAACTGTGGATGGGTGCACATCCGAAAAGC<br>AGCAGTCGTATTACCACCGCAAATGGTGAAACC<br>GTTAGCCTGCGTGATGCAATCGAAAAAACAAA<br>ACCGCCATGCTGGGTGAAGCAGTTGCAAATCGT<br>TTTGGTGAACTGCCGTTTCTGTTAAAGTTCTGT<br>GTGCAGCACAGCCGCTGAGCATTTCAGGTTTCATC<br>CGAATAAACGTAATAGCGAAATTGGCTTTGCCA<br>AAGAAAATGCAGCAGGTATTCGGATGGATGCAG<br>CAGAACGTAACATAAAGATCCGAATCATAAAC<br>GGAACCTGGTTTTTGCCTGACCCCGTTTCTGGC<br>AATGAATGCATTTCTGTGAATTTAGCGATATTGT<br>GAGCCTGCTGCAGCCGGTTGCCGGTGCACATAG<br>CGCAATTGCACATTTTCTGCAGGTCCGAATGC<br>AGAACGTCTGAGCCAGCTGTTTGAAGCCTGCT<br>GAATATGCAGGGTGAAGAAAAAGCCGTGCACT<br>GGCAGTTCTGAAAGCAGCACTGAATAGCCAGCA<br>GGCGAACCCTGGCAGACCATTTCGTGTTATTAG<br>CGAATATTATCCGGATGATAGCGGTCTGTTTAG<br>CCCTCTGCTGCTGAATGTTGTTAAACTGAATCCG<br>GGTGAAGCCATGTTTCTGTTCCGAGAAACACCG<br>CATGCATATCTGCAGGGTGTTCGACTGGAAGTT<br>ATGGCAAATAGCGATAATGTTCTGCGTGCAGGT<br>CTGACCCCGAAATACATTGATATTCCAGAACTGG<br>TTGCCAACGTGAAATTTGAACCGAAACCGGCAG<br>CGAACTGCTGACCGCACCGGTTAAAAGCGGTG<br>CAGAACTGGATTTTCCGATTCGGGTGGATGATT<br>TTGCATTTAGTCTGCATGATCTGGCACTGCAAG<br>AAACCAGCATTGGTCAGCATAGCGCAGCAATTC<br>TGTTTTGTGTTGAAGGTGAAGCCGTTCTGCGTA<br>AAGATGAACAGCGTCTGGTTCTGAAACCTGGTG<br>AAAGCGCATTTATTGGTGCAGATGAAAGTCCGG<br>TTAATGCAAGCGGCACCGGTCGTCTGGCACGTG<br>TTTATAACAAACTGTAA |



**Table S19.** All sequences used cont.

| Plasmid | gid | name  | DNA | GK  | Long name         | Alternate name | CDS                                                                                                                                                                                                                                                                                                                                                                                                                                                                                                                                                                                                                                                                                                                                                                                                                                                                                                                                                                                                                                                                                                                                                                                                                                                                                    |
|---------|-----|-------|-----|-----|-------------------|----------------|----------------------------------------------------------------------------------------------------------------------------------------------------------------------------------------------------------------------------------------------------------------------------------------------------------------------------------------------------------------------------------------------------------------------------------------------------------------------------------------------------------------------------------------------------------------------------------------------------------------------------------------------------------------------------------------------------------------------------------------------------------------------------------------------------------------------------------------------------------------------------------------------------------------------------------------------------------------------------------------------------------------------------------------------------------------------------------------------------------------------------------------------------------------------------------------------------------------------------------------------------------------------------------------|
| pJT9a   | 3   | manA3 | 682 | 533 | manA_opt_and_ramp | Geneart Ramp   | <pre> + ATGCAAAAACCTCATTAACCTCAGTGCAAAAATATG CCTGGGGAAGTAAAACCTGCGTTAACGGAACCTT ATGGCATCGCCAATCCTCAGCAGCAGCCAATGG CTGAACCTCTGGATGGGCGCGCATCCAAAAAGCT CATCGCGAATCACGACCGCGAATGGTGAAACCG TTAGCCTGCGTGATGCAATCGAAAAAACAAAA CCGCCATGCTGGGTGAAGCAGTTGCAAATCGTT TTGGTGAACCTGCCGTTTCTGTTTAAAGTTCTGT GTGCAGCACAGCCGCTGAGCATTTCAGGTTTCATC CGAATAAACGTAATAGCGAAATTGGCTTTGCCA AAGAAAAATGCAGCAGGTATTCGGATGGATGCAG CAGAACGTAACATAAAGATCCGAATCATAAACC AGAACCTGGTTTTTGCACCTGACCCCGTTTCTGGC AATGAATGCATTTCTGTGAATTTAGCGATATTGT GAGCCTGCTGCAGCCGGTTGCCGGTGCCCATAG CGCAATTGCACATTTTCTGCAGGTTCCGAATGCC GAACGTCTGAGCCAGCTGTTTGCAAGCCTGCTG AATATGCAGGGTGAAGAAAAAGCCGTGCACTG GCAGTTCTGAAAGCAGCACTGAATAGCCAGCAG GGCGAACCGTGCCAGACCATTTCGTGTTATTAGC GAATATTATCCGGATGATAGCGGTCTTTTTAGC CCTCTGCTGCTGAATGTTGTTAAACTGAATCCG GGTGAAGCCATGTTTCTGTTCCGAGAAACACCG CATGCTTATCTGCAGGGTGTTCGACTGGAAGTT ATGGCAAATAGCGATAATGTTCTGCGTGCAGGT CTGACCCCGAAAATACATTGATATTCCAGAACTGG TTGCCAACGTGAAATTTGAACCGAAACCGGCAG CCGAACCTGCTGACCGCACCGGTTAAAAGCGGTG CAGAACCTGGATTTTCCGATTCGGGTGGATGATT TTGCATTTAGTTTGCATGATCTGGCACTGCAAG AAACCAGCATTGGTCAGCATAGCGCAGCAATTC TGTTTTGTGTTGAAGGTGAAGCCGTTCTGCGTA AAGATGAACAGCGTCTGGTTCTGAAACCTGGTG AAAGCGCATTTATTGGTGCAGATGAAAGTCCGG TTAATGCAAGCGGCACCGTCTGCTGCGCACGTG TTTATAACAAACTGTAA </pre> |

**Table S19.** All sequences used cont.

| Plasmid | gid | name   | DNA | GK  | Long name                     | Alternate name | CDS                                                                                                                                                                                                                                                                                                                                                                                                                                                                                                                                                                                                                                                                                                                                                                                                                                                                                                                                                                                                                                                                                                                                                                                                                                                                                                                                                                                                                                         |
|---------|-----|--------|-----|-----|-------------------------------|----------------|---------------------------------------------------------------------------------------------------------------------------------------------------------------------------------------------------------------------------------------------------------------------------------------------------------------------------------------------------------------------------------------------------------------------------------------------------------------------------------------------------------------------------------------------------------------------------------------------------------------------------------------------------------------------------------------------------------------------------------------------------------------------------------------------------------------------------------------------------------------------------------------------------------------------------------------------------------------------------------------------------------------------------------------------------------------------------------------------------------------------------------------------------------------------------------------------------------------------------------------------------------------------------------------------------------------------------------------------------------------------------------------------------------------------------------------------|
| pJT27a  | 4   | manA4a | 746 | 528 | manA_orig<br>OptSpeedF<br>old | Deoptimized    | <p>ATGCAAAAGCTAATAAATTCCGTCCAAAATTATG<br/> CCTGGGGATCCAAGACCGCCCTAACCGAGCTAT<br/> ATGGAATAGCCAATCCACAACAACAACCAATGG<br/> CCGAGCTATGGATGGGAGCCCATCCAAAGTCCT<br/> CCTCCCGGATAACCACCGCCAATGGAGAGACCG<br/> TCTCCCTACGGGATGCCATAGAGAAGAATAAGA<br/> CGCCCATGCTAGGAGAGGCCGTGCCAATCGGT<br/> TTGGAGAGCTACCATTTCTATTTAAGGTCCTATG<br/> TGCCGCCCCAACCACTATCCATACAAGTCCATCCA<br/> AATAAGCGGAATTCCGAGATAGGATTTGCCAAG<br/> GAGAATGCCGCCGGAATACCAATGGATGCCGCC<br/> GAGCGGAATTATAAGGATCCAAATCATAAGCCA<br/> GAGCTAGTCTTTGCCCTAACCCATTTCTAGCCA<br/> TGAATGCCTTTCGGGAGTTTTCCGATATAGTCTC<br/> CCTACTACAACCAAGTCGCCGAGCCCATTCGCC<br/> ATAGCCCATTTCTACAAGTCCAAATGCCGAGC<br/> GGCTATCCCAACTATTTGCCTCCCTACTAAATAT<br/> GCAAGGAGAGGAGAAGTCCCGGGCCCTAGCCGT<br/> CCTAAAGGCCGCCCTAAATTCCCAACAAGGAGA<br/> GCCATGGCAAACCATACGGGTCATATCCGAGTA<br/> TTATCCAGATGATTCCGGACTATTTTCCCCACTA<br/> CTACTAAAATGTCGTCAAGCTAAAATCCAGGAGAG<br/> GCCATGTTTCTATTTGCCGAGACCCACATGCCT<br/> ATCTACAAGGAGTCGCCCTAGAGGTCATGGCCA<br/> ATTCCGATAATGTCTACGGGCCGGACTAACCC<br/> AAAGTATATAGATATACCAGAGCTAGTCGCCAA<br/> TGTCAGTTTGAGCCAAAGCCAGCCGGAGAGCT<br/> ACTAACCGCCCCAGTCAAGTCCGGAGCCGAGCT<br/> AGATTTTCCAATACCAGTCGATGATTTTGCCTTT<br/> TCCCTACATGATCTAGCCCTACAAGAGACCTCCA<br/> TAGGACAACATTCGCGCCGCCATACTATTTTGTGT<br/> CGAGGGAGAGGCCGTCTACGGAAGGATGAGCA<br/> ACGGCTAGTCCTAAAGCCAGGAGAGTCCGCCTT<br/> TATAGGAGCCGATGAGTCCCCAGTCAATGCCTC<br/> CGGAACCGGACGGCTAGCCCGGGTCTATAATAA<br/> GCTATAG</p> |

**Table S19.** All sequences used cont.

| Plasmid | gid | name  | DNA | GK  | Long name            | Alternate name | CDS                                                                                                                                                                                                                                                                                                                                                                                                                                                                                                                                                                                                                                                                                                                                                                                                                                                                                                                                                                                                                                                                                                                                                                                                                                                                                                                                                            |
|---------|-----|-------|-----|-----|----------------------|----------------|----------------------------------------------------------------------------------------------------------------------------------------------------------------------------------------------------------------------------------------------------------------------------------------------------------------------------------------------------------------------------------------------------------------------------------------------------------------------------------------------------------------------------------------------------------------------------------------------------------------------------------------------------------------------------------------------------------------------------------------------------------------------------------------------------------------------------------------------------------------------------------------------------------------------------------------------------------------------------------------------------------------------------------------------------------------------------------------------------------------------------------------------------------------------------------------------------------------------------------------------------------------------------------------------------------------------------------------------------------------|
| pJT28   | 5   | manA5 | 727 | 460 | manA_orig<br>Opt5050 | Intermediate   | ATGCAGAAACTGATCAACTCAGTTCAGAACTAC<br>GCATGGGGCTCAAAAACGGCACTGACGGAAGT<br>TACGGCATCGCAAACCCCCAGCAGCAGCCCATG<br>GCAGAACTGTGGATGGGCGCACACCCCAAATCA<br>TCATCACGAATCACGACGGCAAACGGCGAAACG<br>GTTTCACTGCGAGACGCAATCGAAAAAACAAA<br>ACGGCAATGCTGGGCGAAGCAGTTGCAAACCGA<br>TTCGGCGAACTGCCCTTCTGTTCAAAGTTCTGT<br>GCGCAGCACAGCCCTGTCAATCCAGGTTACCC<br>CAACAAACGAAACTCAGAAATCGGCTTCGCAAA<br>AGAAAACGCAGCAGGCATCCCCATGGACGCAGC<br>AGAACGAAACTACAAAGACCCCAACCACAAACCC<br>GAACTGGTTTTCGCACTGACGCCCTTCTGGCAA<br>TGAACGCATTCCGAGAATTCTCAGACATCGTTTC<br>ACTGCTGCAGCCCGTTGCAGGCGCACACTCAGC<br>AATCGCACACTTCTGCAGGTTCCAACGCAGAA<br>CGACTGTCACAGCTGTTTCGCATCACTGCTGAACA<br>TGCAGGGCGAAGAAAAATCACGAGCACTGGCAG<br>TTCTGAAAGCAGCACTGAACTCACAGCAGGGCG<br>AACCCCTGGCAGACGATCCGAGTTATCTCAGAAT<br>ACTACCCCGACGACTCAGGCCTGTTCTCACCCCT<br>GCTGCTGAACGTTGTTAAACTGAACCCCGGCGA<br>AGCAATGTTCCGTGTTTCGCAGAAACGCCCCACGC<br>ATACCTGCAGGGCGTTGCACTGGAAGTTATGGC<br>AAACTCAGACAACGTTCTGCGAGCAGGCCTGAC<br>GCCCAAATACATCGACATCCCCGAACTGGTTGCA<br>AACGTTAAATTCGAACCCAAACCCGCAGGGCAA<br>CTGCTGACGGCACCCGTTAAATCAGGCGCAGAA<br>CTGGACTTCCCCATCCCCGTTGACGACTTCGCAT<br>TCTCACTGCACGACCTGGCACTGCAGGAAACGT<br>CAATCGGCCAGCACTCAGCAGCAATCCTGTTCTG<br>CGTTGAAGGCGAAGCAGTTCTGCGAAAAGACGA<br>ACAGCGACTGGTTCTGAAACCCGGCGAATCAGC<br>ATTCATCGGGCGAGACGAATCACCCGTTAACGC<br>ATCAGGCACGGGCCGACTGGCAGGTTTTACAA<br>CAAACGTAG |

**Table S19.** All sequences used cont.

| Plasmid | gid | name  | DNA | GK  | Long name        | Alternate name | CDS                                                                                                                                                                                                                                                                                                                                                                                                                                                                                                                                                                                                                                                                                                                                                                                                                                                                                                                                                                                                                                                                                                                                                                                                                                                                                                                                                                         |
|---------|-----|-------|-----|-----|------------------|----------------|-----------------------------------------------------------------------------------------------------------------------------------------------------------------------------------------------------------------------------------------------------------------------------------------------------------------------------------------------------------------------------------------------------------------------------------------------------------------------------------------------------------------------------------------------------------------------------------------------------------------------------------------------------------------------------------------------------------------------------------------------------------------------------------------------------------------------------------------------------------------------------------------------------------------------------------------------------------------------------------------------------------------------------------------------------------------------------------------------------------------------------------------------------------------------------------------------------------------------------------------------------------------------------------------------------------------------------------------------------------------------------|
| pJT29   | 6   | manA6 | 729 | 461 | manA_orig<br>Acc | Accuracy       | ATGCAAAAAGCTCATAAACTCTGTGCAAAAATTAT<br>GCATGGGGTAGCAAGACTGCTCTAACAGAATTG<br>TACGGTATAGCCAACCCGCAACAGCAACCTATG<br>GCCGAACTATGGATGGGTGCTCACCCAAAAGTCC<br>AGCTCCCGGATAACTACCGCCAACGGAGAGACC<br>GTCTCACTTAGAGATGCGATTGAGAAGAATAAAA<br>ACCGCCATGCTTGGGGAGGCGGTTGCCAATCGG<br>TTTGGTGAGTTACCATTTCTCTTTAAAGTATTAT<br>GTGCCGCCAGCCACTCTCGATACAGGTGCATCC<br>GAATAAAAAGAAAATAGTGAGATAGGATTTGCCAA<br>AGAAAACGCAGCAGGGATACCAATGGACGCCCG<br>AGAGCGGAATTATAAAGACCCAAATCACAAAGCC<br>CGAGTTAGTGTTCGCCTTAACCCATTTCTAGCC<br>ATGAACGCATTCAGAGAGTTCAGTGATATAGTC<br>AGCCTACTACAGCCAGTTCGCTGGAGCCCATAGC<br>GCTATCGCCCACTTTCTTCAGGTGCCAAACGCCG<br>AACGGCTCAGCCAACTTTTTGCGAGTCTATTTAAA<br>TATGCAGGGTGAGGAAAAGTCGAGGGCACTTGC<br>CGTGCTAAAGGCAGCCCTAAATTCCCAGCAAGG<br>AGAGCCATGGCAAACCTATACGCGTCATATCGGA<br>ATACTATCCTGACGACTCCGGGCTGTTTAGTCCG<br>CTACTACTTAACGTCGTAAACTAAATCCGGGCG<br>AAGCGATGTTTTATTTGCTGAAAACCCCTCACGC<br>CTATCTTCAGGGTGTTCGCCCTCGAAGTGATGGC<br>TAATTCAGATAATGTCTTACGGGCCGGTCTCAC<br>ACCAAAGTATATAGACATCCCAGAATTAGTCGCC<br>AACGTGAAGTTCGAACCAAAGCCGGCCGGCGAG<br>CTCTTGACCGCCCCAGTCAAGAGCGGTGCTGAA<br>CTAGATTTTCCAATACCAGTCGACGACTTCGCCT<br>TTTCCCTCCATGACCTTGCCCTTCAGGAGACCTC<br>CATAGGACAGCATAGCGCCGCAATACTATTCTG<br>CGTCCAAGGAGAAGCCGTGCTCCGGAAGGATGA<br>GCAACGGCTTGTGTTGAAGCCAGGAGAGAGCGC<br>ATTCATAGGAGCCGATGAGAGTCCGGTTAATGC<br>TTCCGGTACCGGTAGACTAGCCAGGGTGTATAA<br>CAAACGTAG |

**Table S19.** All sequences used cont.

| Plasmid | gid | name  | DNA | GK  | Long name               | Alternate name | CDS                                                                                                                                                                                                                                                                                                                                                                                                                                                                                                                                                                                                                                                                                                                                                                                                                                                                                                                                                                                                                                                                                                                                                                                                                                                                                                                                                              |
|---------|-----|-------|-----|-----|-------------------------|----------------|------------------------------------------------------------------------------------------------------------------------------------------------------------------------------------------------------------------------------------------------------------------------------------------------------------------------------------------------------------------------------------------------------------------------------------------------------------------------------------------------------------------------------------------------------------------------------------------------------------------------------------------------------------------------------------------------------------------------------------------------------------------------------------------------------------------------------------------------------------------------------------------------------------------------------------------------------------------------------------------------------------------------------------------------------------------------------------------------------------------------------------------------------------------------------------------------------------------------------------------------------------------------------------------------------------------------------------------------------------------|
| pJT36   | 7   | manA7 | 738 | 524 | manaGesch<br>windigkeit | Speed          | ATGCAGAAACTGATCAACTCTGTTCAGAACTAC<br>GCATGGGGCTCTAAAACGGCACTGACGGAACTG<br>TACGGCATCGCAAACCCCTCAGCAGCAGCCTATG<br>GCAGAACTGTGGATGGGCGCACACCCTAAATCT<br>TCTTCTCGAATCACGACGGCAAACGGCGAAACG<br>GTTTCTCTGCGAGACGCAATCGAAAAAACAAA<br>ACGGCAATGCTGGGCGAAGCAGTTGCAAACCGA<br>TTCGGCGAACTGCCTTTCTGTTCAAAAGTTCTGT<br>GCGCAGCACAGCCTCTGTCTATCCAGGTTACCC<br>TAACAAACGAAACTCTGAAATCGGCTTCGCAA<br>AGAAAACGCAGCAGGCATCCCTATGGACGCAG<br>AGAACGAAACTACAAAGACCCTAACCACAAACCT<br>GAACTGGTTTTCGCACTGACGCCTTTCTGGCAA<br>TGAACGCATTCCGAGAATTCTCTGACATCGTTTC<br>TCTGCTGCAGCCTGTTGCAGGCGCACACTCTGC<br>AATCGCACACTTCCTGCAGGTTCTAACGCAGAA<br>CGACTGTCTCAGCTGTTTCGCATCTCTGCTGAACA<br>TGCAGGGCGAAGAAAAATCTCGAGCACTGGCAG<br>TTCTGAAAGCAGCACTGAACTCTCAGCAGGGCG<br>AACCTTGGCAGACGATCCGAGTTATCTCTGAAT<br>ACTACCTGACGACTCTGGCCTGTTCTCTCCTCT<br>GCTGCTGAACGTTGTTAAACTGAACCCTGGCGA<br>AGCAATGTTCCCTGTTTCGCAGAAACGCCTCACGC<br>ATACCTGCAGGGCGTTGCACTGGAAGTTATGGC<br>AAACTCTGACAACGTTCTGCGAGCAGGCCTGAC<br>GCCTAAATACATCGACATCCCTGAACTGGTTGC<br>AAACGTTAAATTCGAACTAAACCTGCAGGCCGA<br>ACTGCTGACGGCACCTGTTAAATCTGGCGCAGA<br>ACTGGACTTCCCTATCCCTGTTGACGACTTCGCA<br>TTCTCTCTGCACGACCTGGCACTGCAGGAAACG<br>TCTATCGGCCAGCACTCTGCAGCAATCCTGTTCT<br>GCGTTGAAGGCGAAGCAGTTCTGCGAAAAGACG<br>AACAGCGACTGGTTCTGAAACCTGGCGAATCTG<br>CATTCATCGGGCGAGACGAATCTCCTGTTAACGC<br>ATCTGGCACGGGCCGACTGGCACGAGTTTACAA<br>CAAACGTAA |

**Table S19.** All sequences used cont.

| Plasmid | gid | name  | DNA | GK  | Long name            | Alternate name     | CDS                                                                                                                                                                                                                                                                                                                                                                                                                                                                                                                                                                                                                                                                                                                                                                                                                                                                                                                                                                                                                                                                                                                                                                                                                                                                                                                                                                                                                                           |
|---------|-----|-------|-----|-----|----------------------|--------------------|-----------------------------------------------------------------------------------------------------------------------------------------------------------------------------------------------------------------------------------------------------------------------------------------------------------------------------------------------------------------------------------------------------------------------------------------------------------------------------------------------------------------------------------------------------------------------------------------------------------------------------------------------------------------------------------------------------------------------------------------------------------------------------------------------------------------------------------------------------------------------------------------------------------------------------------------------------------------------------------------------------------------------------------------------------------------------------------------------------------------------------------------------------------------------------------------------------------------------------------------------------------------------------------------------------------------------------------------------------------------------------------------------------------------------------------------------|
| pJT37   | 8   | manA8 | 740 | 525 | manA_orig<br>AccRamp | Accuracy +<br>Ramp | <p>ATGCAAAAACATTAACACTCAGTGCAAAAATATG<br/> CCTGGGGAAGTAAAACGCGTTAACGGAACTTT<br/> ATGGCATCGCCAATCCTCAGCAGCAGCCAATGG<br/> CTGAACTCTGGATGGGCGCGCATCCCAAAAGCT<br/> CATCGCGAATCAGACCGCAAACGGCGAAAACGG<br/> TTTCACTGCGAGACGCAATCGAAAAAACAAAA<br/> CGGCAATGCTGGGCGAAGCAGTTGCAAACCGAT<br/> TCGGCGAACTGCCCTTCTGTTCAAAGTTCTGTG<br/> CGCAGCACAGCCCTGTCAATCCAGGTTACCCCC<br/> AACAAAACGAAACTCAGAAAATCGGCTTCGCAAAA<br/> GAAAACGCAGCAGGCATCCCCATGGACGCAGCA<br/> GAACGAAACTACAAAGACCCCAACCACAAACCCG<br/> AACTGGTTTTTCGCACTGACGCCCTTCTGGCAAT<br/> GAACGCATTCCGAGAATTCTCAGACATCGTTTCA<br/> CTGCTGCAGCCCGTTGCAGGCGCACACTCAGCA<br/> ATCGCACACTTCTGCAGGTTCCCAACGCAGAAC<br/> GACTGTACAGCTGTTTCGCATCACTGCTGAACAT<br/> GCAGGGCGAAGAAAAATCAGCAGCACTGGCAGT<br/> TCTGAAAGCAGCACTGAACTCACAGCAGGGCGA<br/> ACCCCTGGCAGACGATCCGAGTTATCTCAGAATA<br/> CTACCCCGACGACTCAGGCCTGTTCTCACCCCTG<br/> CTGCTGAACGTTGTAAACTGAACCCCGGCGAA<br/> GCAATGTTCTGTTTCGCAGAAACGCCCCACGCA<br/> TACCTGCAGGGCGTTGCACTGGAAGTTATGGCA<br/> AACTCAGACAACGTTCTGCGAGCAGGCCTGACG<br/> CCCAAATACATCGACATCCCCGAACTGGTTGCAA<br/> ACGTTAAATTCGAACCCAAACCCGCAGGCGAAC<br/> TGCTGACGGCACCCGTTAAATCAGGCGCAGAAC<br/> TGGACTTCCCCATCCCCGTTGACGACTTTCGATT<br/> CTCACTGCACGACCTGGCACTGCAGGAAACGTC<br/> AATCGGCCAGCACTCAGCAGCAATCCTGTTCTGC<br/> GTTGAAGGCGAAGCAGTTCTGCCAAAAGACGAA<br/> CAGCGACTGGTTCTGAAACCCGGCGAATCAGCA<br/> TTCATCGGCGCAGACGAATCACCCGTTAACGCA<br/> TCAGGCACGGGCGGACTGGCAGGATTTACAAC<br/> AAACTGTAG</p> |

**Table S19.** All sequences used cont.

| Plasmid | gid | name  | DNA | GK  | Long name                    | Alternate name         | CDS                                                                                                                                                                                                                                                                                                                                                                                                                                                                                                                                                                                                                                                                                                                                                                                                                                                                                                                                                                                                                                                                                                                                                                                                                                                                                                                                                                                                                                           |
|---------|-----|-------|-----|-----|------------------------------|------------------------|-----------------------------------------------------------------------------------------------------------------------------------------------------------------------------------------------------------------------------------------------------------------------------------------------------------------------------------------------------------------------------------------------------------------------------------------------------------------------------------------------------------------------------------------------------------------------------------------------------------------------------------------------------------------------------------------------------------------------------------------------------------------------------------------------------------------------------------------------------------------------------------------------------------------------------------------------------------------------------------------------------------------------------------------------------------------------------------------------------------------------------------------------------------------------------------------------------------------------------------------------------------------------------------------------------------------------------------------------------------------------------------------------------------------------------------------------|
| pJT38   | 9   | manA9 | 742 | 526 | manA_orig<br>Opt5050Ra<br>mp | Intermediate<br>+ Ramp | <p>ATGCAAAAACATTAACCTCAGTGCAAAAATATG<br/> CCTGGGGAAGTAAAACCTGCGTTAACGGAACTTT<br/> ATGGCATCGCCAATCCTCAGCAGCAGCCAATGG<br/> CTGAACCTCTGGATGGGCGCGCATCCAAAAAGCT<br/> CATCGCGAATCAGACCGCCAACGGAGAGACCG<br/> TCTCACTTAGAGATGCGATTGAGAAGAATAAAA<br/> CGCCATGCTTGGGGAGGCGGTTGCCAATCGGT<br/> TTGGTGAGTTACCATTTCTCTTTAAAGTATTATG<br/> TGCCGCCAGCCACTCTCGATACAGGTGCATCCG<br/> AATAAAAGAAAATAGTGAGATAGGATTTGCCAAA<br/> GAAAACGCAGCAGGGATACCAATGGACGCCGCA<br/> GAGCGGAATTATAAAGACCCAAATCACAAGCCC<br/> GAGTTAGTGTTCGCCTTAACCCATTTCTAGCCA<br/> TGAACGCATTCAGAGAGTTTCAGTGATATAGTCA<br/> GCCTACTACAGCCAGTCGCTGGAGCCCATAGCG<br/> CTATCGCCCACTTTCTTCAGGTGCCAAACGCCGA<br/> ACGGCTCAGCCAACTTTTTGCGAGTCTATTAAT<br/> ATGCAGGGTGAGGAAAAGTCGAGGGCACTTGCC<br/> GTGCTAAAGGCAGCCCTAAATTCAGCAAGGA<br/> GAGCCATGGCAAACTATACGCGTCATATCGGAA<br/> TACTATCCTGACGACTCCGGGCTGTTTAGTCCGC<br/> TACTACTTAACGTCTGTTAAACTAAATCCGGGCGA<br/> AGCGATGTTTTATTTGCTGAAAACCCCTCACGCC<br/> TATCTTCAGGGTGTGCGCCCTCGAAGTGATGGCT<br/> AATTCAGATAATGTCTTACGGGCGGTCTCACA<br/> CCAAAGTATATAGACATCCAGAATTAGTCGCCA<br/> ACGTGAAGTTCGAACCAAAGCCGGCCGGCGAGC<br/> TCTTGACCGCCCCAGTCAAGAGCGGTGCTGAAC<br/> TAGATTTTCCAATACCAGTCGACGACTTCGCCTT<br/> TTCCCTCCATGACCTTGCCCTTCAGGAGACCTCC<br/> ATAGGACAGCATAGCGCCGCAATACTATTCTGC<br/> GTCGAAGGAGAAGCCGTGCTCCGGAAGGATGAG<br/> CAACGGCTTGTGTTGAAGCCAGGAGAGAGCGCA<br/> TTCATAGGAGCCGATGAGAGTCCGGTTAATGCT<br/> TCCGGTACCGGTAGACTAGCCAGGGTGTATAAC<br/> AAACTGTAG</p> |

**Table S19.** All sequences used cont.

| Plasmid | gid | name           | DNA | GK  | Long name                       | Alternate name |   | CDS                                                                                                                                                                                                                                                                                                                                                                                                                                                                                                                                                                                                                                                                                                                                                                                                                                                                                                                                                                                                                                                                                                                                                                                                                                                                                                                                                                                                                                                                                             |
|---------|-----|----------------|-----|-----|---------------------------------|----------------|---|-------------------------------------------------------------------------------------------------------------------------------------------------------------------------------------------------------------------------------------------------------------------------------------------------------------------------------------------------------------------------------------------------------------------------------------------------------------------------------------------------------------------------------------------------------------------------------------------------------------------------------------------------------------------------------------------------------------------------------------------------------------------------------------------------------------------------------------------------------------------------------------------------------------------------------------------------------------------------------------------------------------------------------------------------------------------------------------------------------------------------------------------------------------------------------------------------------------------------------------------------------------------------------------------------------------------------------------------------------------------------------------------------------------------------------------------------------------------------------------------------|
| pJT39   | 10  | manA10         | 744 | 527 | manaGesch<br>windigkeitR<br>amp | Speed<br>Ramp  | + | ATGCAAAAACATTAACACTCAGTGCAAAAACATG<br>CCTGGGGAAGTAAAACGCGTTAACGGAACCTT<br>ATGGCATCGCCAATCCTCAGCAGCAGCCAATGG<br>CTGAACTCTGGATGGGCGCGCATCCCAAAAGCT<br>CATCGCGAATCACGACCGCAAACGGCGAAAACGG<br>TTTCTCTGCGAGACGCAATCGAAAAAACAAAA<br>CGGCAATGCTGGGCGAAGCAGTTGCAAACCGAT<br>TCGGCGAACTGCCTTTCTGTTCAAAGTTCTGTG<br>CGCAGCACAGCCTCTGTCTATCCAGGTTACCCCT<br>AACAAAACGAAACTCTGAAATCGGCTTCGCAAAA<br>GAAAACGCAGCAGGCATCCCTATGGACGCAGCA<br>GAACGAAACTACAAAGACCCCTAACACAAAACCTG<br>AACTGGTTTTTCGCACTGACGCCTTTCTGGCAAT<br>GAACGCATTCCGAGAATTCTCTGACATCGTTTCT<br>CTGCTGCAGCCTGTTGCAGGCGCACACTCTGCA<br>ATCGCACACTTCCTGCAGGTTCTAACGCAGAAC<br>GACTGTCTCAGCTGTTGCGATCTCTGCTGAACAT<br>GCAGGGCGAAGAAAAATCTCGAGCACTGGCAGT<br>TCTGAAAGCAGCACTGAACTCTCAGCAGGGCGA<br>ACCTTGGCAGACGATCCGAGTTATCTCTGAATA<br>CTACCCTGACGACTCTGGCCTGTTCTCTCCTCTG<br>CTGCTGAACGTTGTTAAACTGAACCCTGGCGAA<br>GCAATGTTCTGTTGCGAGAAACGCCTCACGCAT<br>ACCTGCAGGGCGTTGCACTGGAAGTTATGGCAA<br>ACTCTGACAACGTTCTGCGAGCAGGCCTGACGC<br>CTAATAACATCGACATCCCTGAACTGGTTGCAAA<br>CGTTAAATTGCAACCTAAACCTGCAGGGCAACT<br>GCTGACGGCACCTGTTAAATCTGGCGCAGAACT<br>GGACTTCCCTATCCCTGTTGACGACTTCGCATTCT<br>TCTCTGCACGACCTGGCACTGCAGGAAACGTTCT<br>ATCGGCCAGCACTCTGCAGCAATCCTGTTCTGCG<br>TTGAAGGCGAAGCAGTTCTGCGAAAAGACGAAAC<br>AGCGACTGGTTCTGAAACCTGGCGAATCTGCAT<br>TCATCGGCGAGACGAATCTCCTGTTAACGCATC<br>TGGCACGGGCGGACTGGCACGAGTTTACAACAA<br>ACTGTAA<br>AGGTTACTTCATGCGGGTTTCTTGGTTTAATACC<br>TCCCATTTGATCTCCACATTGAAACAGGGCTTGAT<br>ACATATG<br>CTCCACATTGAAACAGGGCTTGATACATATG |
|         |     | 5'utr          |     |     |                                 |                |   |                                                                                                                                                                                                                                                                                                                                                                                                                                                                                                                                                                                                                                                                                                                                                                                                                                                                                                                                                                                                                                                                                                                                                                                                                                                                                                                                                                                                                                                                                                 |
|         |     | 5'utr promoter |     |     |                                 |                |   |                                                                                                                                                                                                                                                                                                                                                                                                                                                                                                                                                                                                                                                                                                                                                                                                                                                                                                                                                                                                                                                                                                                                                                                                                                                                                                                                                                                                                                                                                                 |



**Table S19.** All sequences used cont.

| Plasmid | gid | name   | DNA | GK  | Long name | Alternate name | CDS                                                                                                                                                                                                                                                                                                                                                                                                                                                                                                                                                                                                                                                                                                                                                                                                                                                                                                                                                                                                                                                                                                                                                                                                                                                                                                                                   |
|---------|-----|--------|-----|-----|-----------|----------------|---------------------------------------------------------------------------------------------------------------------------------------------------------------------------------------------------------------------------------------------------------------------------------------------------------------------------------------------------------------------------------------------------------------------------------------------------------------------------------------------------------------------------------------------------------------------------------------------------------------------------------------------------------------------------------------------------------------------------------------------------------------------------------------------------------------------------------------------------------------------------------------------------------------------------------------------------------------------------------------------------------------------------------------------------------------------------------------------------------------------------------------------------------------------------------------------------------------------------------------------------------------------------------------------------------------------------------------|
| pJT15   |     | ova wt | 710 | 435 | ova_orig  | Wildtype       | ATGGGCTCCATCGGGCCGAGCAAGCATGGAATTT<br>TGTTTTGATGTATTCAAGGAGCTCAAAGTCCAC<br>CATGCCAATGAGAACATCTTCTACTGCCCCATTG<br>CCATCATGTCAGCTCTAGCCATGGTATACCTGG<br>GTGCAAAAGACAGCACCAGGACACAGATAAATA<br>AGGTTGTTGCTTTGATAAACTTCCAGGATTG<br>GAGACAGTATTGAAGCTCAGTGTGGCACATCTG<br>TAAACGTTCACTCTTCACTTAGAGACATCCTCAA<br>CCAAATCACCAAACCAAATGATGTTTATTCGTTT<br>AGCCTTGCCAGTAGACTTTATGCTGAAGAGAGA<br>TACCCAATCCTGCCAGAATACTTGCAAGTGTGTG<br>AAGGAACTGTATAGAGGAGGCTTGGAACCTATC<br>AACTTCAAACAGCTGCAGATCAAGCCAGAGAG<br>CTCATCAATTCTGGGTAGAAAAGTCAGACAAAT<br>GGAATTATCAGAAATGTCCTTCAGCCAAGCTCC<br>GTGGATTCTCAAACGCAATGGTTCTGGTTAAT<br>GCCATTGTCTTCAAAGGACTGTGGGAGAAAACA<br>TTAAAGGATGAAGACACACAAGCAATGCCTTTC<br>AGAGTACTGAGCAAGAAAGCAAACCTGTGCAG<br>ATGATGTACCAGATTGGTTTATTTAGAGTGGCA<br>TCAATGGCTTCTGAGAAAATGAAGATCCTGGAG<br>CTTCATTTGCCAGTGGGACAATGAGCATGTTG<br>GTGCTGTTGCCGATGAAGTCTCAGGCCTTGAG<br>CAGCTTGAGAGTATAATCAACTTTGAAAACTG<br>ACTGAATGGACCAGTTCTAATGTTATGGAAGAG<br>AGGAAGATCAAAGTGTACTTACCTCGCATGAAG<br>ATGGAGGAAAAATACAACCTCACATCTGTCTTA<br>ATGGCTATGGGCATTACTGACGTGTTTAGCTCT<br>TCAGCCAATCTGTCTGGCATCTCCTCAGCAGAG<br>AGCCTGAAGATATCTCAAGCTGTCCATGCAGCA<br>CATGCAGAAATCAATGAAGCAGGCAGAGAGGTG<br>GTAGGGTCAGCAGAGGCTGGAGTGGATGCTGCA<br>AGCGTCTCTGAAGAATTTAGGGCTGACCATCCA<br>TTCTCTTCTGTATCAAGCACATCGCAACCAACG<br>CCGTCTCTCTTTGGCAGATGTGTTTCCCCT |

**Table S19.** All sequences used cont.

| Plasmid | gid | name    | DNA | GK  | Long name | Alternate name | CDS                                                                                                                                                                                                                                                                                                                                                                                                                                                                                                                                                                                                                                                                                                                                                                                                                                                                                                                                                                                                                                                                                                                                                                                                                                                                                                                                                                                                                              |
|---------|-----|---------|-----|-----|-----------|----------------|----------------------------------------------------------------------------------------------------------------------------------------------------------------------------------------------------------------------------------------------------------------------------------------------------------------------------------------------------------------------------------------------------------------------------------------------------------------------------------------------------------------------------------------------------------------------------------------------------------------------------------------------------------------------------------------------------------------------------------------------------------------------------------------------------------------------------------------------------------------------------------------------------------------------------------------------------------------------------------------------------------------------------------------------------------------------------------------------------------------------------------------------------------------------------------------------------------------------------------------------------------------------------------------------------------------------------------------------------------------------------------------------------------------------------------|
| pJT16   |     | ova opt | 711 | 436 | ovasyn    | Geneart        | <p>ATGGGCAGCATTGGAGCAGCTTCCATGGAATTC<br/> TGCTTCGACGTGTTCAAAGAGCTGAAAGTCCAC<br/> CACGCTAACGAAAACATCTTCTATTGTCCGATCG<br/> CCATTATGAGCGCCCTGGCAATGGTTTATCTGG<br/> GTGCCAAAGATTCTACCCGTACACAGATTAACAA<br/> AGTGGTCCGCTTCGACAAAACAGCTGGTTTTGG<br/> TGATAGCATCGAGGCACAGTGTGGTACAAGTGT<br/> GAACGTCCATTCTAGCCTGCGTGATATTCTGAAT<br/> CAGATTACGAAACCGAACGACGTGTATTCCTTTT<br/> CACTGGCCAGTCTGTGTATGCCGAAGAAGCTT<br/> ATCCTATTCTGCCGGAGTATCTGCAATGCGTGA<br/> AAGAAGTGTATCGTGGCGGTCTGGAACCAATCA<br/> ATTTCAAACGGCCGCTGATCAAGCACGTGAAC<br/> TGATTAACAGTTGGGTGGAAAAGTCAGACCAATG<br/> GCATTATCCGTAATGTGCTGCAGCCTAGCAGTG<br/> TTGATTCTCAGACGGCAATGGTCCCTGGTTAACG<br/> CTATTGTGTTTAAAGGCCTGTGGGAGAAAACAT<br/> TCAAAGACGAGGATACCCAAGCAATGCCTTTCC<br/> GTGTTACCGAGCAGGAAAAGCAAACCTGTTTACA<br/> TGATGTATCAAATTGGGCTGTTCGGTGTGGCAA<br/> GCATGGCATCCGAAAAAATGAAAATCCTGGAGC<br/> TGCCTTTTGCTAGTGGTACAATGAGCATGCTGG<br/> TTCTGCTGCCAGATGAAGTTTCAGGTCTGGAGC<br/> AACTGAAAAGCATCATCAACTTCGAGAAAACGTA<br/> CCGAGTGGACCTCTTCTAACGTGATGGAGGAGC<br/> GTA AAAATCAAAGTCTATCTGCCTCGTATGAAAAT<br/> GGAAGAGAAAATATAACCTGACCTCCGTGCTGAT<br/> GGCTATGGGGATTACTGACGTGTTTAGCAGTAG<br/> CGCCAATCTGAGTGGGATTTCAAGCGCTGAGTC<br/> TCTGAAAATCTCTCAGGCCGTTTCATGCCGCTCAT<br/> GCCGAAAATCAATGAAGCCGGTCTGTAAGTCGTG<br/> GGAAGTGTGAAGCCGGGGTGGATGCCGCTTCT<br/> GTTAGCGAAGAATTTTCGTGCCGATCACCCGTTT<br/> CTGTTCTGTATCAAACACATTGCTACCAACGCCG<br/> TACTGTTTTTTGGACGCTGTGTGAGCCCG</p> |

**Table S19.** All sequences used cont.

| Plasmid | gid | name | DNA | GK  | Long name         | Alternate name | CDS                                                                                                                                                                                                                                                                                                                                                                                                                                                                                                                                                                                                                                                                                                                                                                                                                                                                                                                                                                                                                                                                                                                                                                                                                                                                                                                                     |
|---------|-----|------|-----|-----|-------------------|----------------|-----------------------------------------------------------------------------------------------------------------------------------------------------------------------------------------------------------------------------------------------------------------------------------------------------------------------------------------------------------------------------------------------------------------------------------------------------------------------------------------------------------------------------------------------------------------------------------------------------------------------------------------------------------------------------------------------------------------------------------------------------------------------------------------------------------------------------------------------------------------------------------------------------------------------------------------------------------------------------------------------------------------------------------------------------------------------------------------------------------------------------------------------------------------------------------------------------------------------------------------------------------------------------------------------------------------------------------------|
| pJT17   |     | oval | 712 | 437 | ova_origOpt Speed | Deoptimized    | ATGGGAAGCATAGGGCGCAGCTTCCATGGAATTT<br>TGCTTCGACGTATTTAAGGAGCTAAAGGTCCAT<br>CATGCCAATGAGAATATATTTTATTGTCCAATAG<br>CCATAATGTCCGCCCTAGCCATGGTCTATCTAGG<br>AGCCAAGGATTCCACCCGGACCCAAATAAATAA<br>GGTCGTCCGGTTTGATAAGCTACCAGGATTTGG<br>AGATTCCATAGAGGCCCAATGTGGAACCTCCGT<br>CAATGTCCATTCTCCCTACGGGATATACTAAAT<br>CAAATAACCAAGCCAAATGATGTCTATTCCTTTT<br>CCCTAGCCTCCCGGCTATATGCCGAGGAGCGGT<br>ATCCAATACTACCAGAGTATCTACAATGTGTCAA<br>GGAGCTATATCGGGGAGGACTAGAGCCAATAAA<br>TTTTCAAACCGCCCGATCAAGCCCGGGAGCT<br>AATAAATTCTGGGTGCGAGTCCCAAACCAATGG<br>AATAATACGGAATGTCTACAACCATCCTCCGTC<br>GATTCCCAAACCGCCATGGTCTAGTCAATGCCA<br>TAGTCTTTAAGGGACTATGGGAGAAGACCTTTA<br>AGGATGAGGATACCCAAGCCATGCCATTTCCGG<br>TCACCGAGCAAGAGTCCAAGCCAGTCCAATGA<br>TGTATCAAATAGGACTATTTCCGGTCCGCTCCAT<br>GGCCTCCGAGAAGATGAAGATACTAGAGCTACC<br>ATTTGCCCTCCGAACCATGTCCATGCTAGTCCTA<br>CTACCAGATGAGGTCTCCGGACTAGAGCAACTA<br>GAGTCCATAATAAATTTTGAGAAGCTAACCGAG<br>TGGACCTCCTCCAATGTCTATGGAGGAGCGGAAG<br>ATAAAGGTCTATCTACCACGGATGAAGATGGAG<br>GAGAAGTATAATCTAACCTCCGTCTAATGGCCA<br>TGGGAATAACCGATGTCTTTTCTCCTCCGCCAA<br>TCTATCCGGAATATCCTCCGCCGAGTCCCTAAAG<br>ATATCCCAAGCCGTCCATGCCGCCCATGCCGAGA<br>TAAATGAGGCCGGACGGGAGGTCGTCCGATCCG<br>CCGAGGCCGGAGTCGATGCCGCCTCCGTCTCCG<br>AGGAGTTTCCGGCCGATCATCCATTTCTATTTTG<br>TATAAAGCATATAGCCACCAATGCCGTCCATTTT<br>TTTGGACGGTGTGTCTCCCA |

**Table S19.** All sequences used cont.

| Plasmid | gid | name | DNA | GK  | Long name          | Alternate name | CDS                                                                                                                                                                                                                                                                                                                                                                                                                                                                                                                                                                                                                                                                                                                                                                                                                                                                                                                                                                                                                                                                                                                                                                                                                                                                                                                                      |
|---------|-----|------|-----|-----|--------------------|----------------|------------------------------------------------------------------------------------------------------------------------------------------------------------------------------------------------------------------------------------------------------------------------------------------------------------------------------------------------------------------------------------------------------------------------------------------------------------------------------------------------------------------------------------------------------------------------------------------------------------------------------------------------------------------------------------------------------------------------------------------------------------------------------------------------------------------------------------------------------------------------------------------------------------------------------------------------------------------------------------------------------------------------------------------------------------------------------------------------------------------------------------------------------------------------------------------------------------------------------------------------------------------------------------------------------------------------------------------|
| pJT18   |     | ova2 | 713 | 438 | ova_origOpt<br>Acc | Optimized      | ATGGGCTCAATCGGGCGCAGCATCAATGGAATTC<br>TGCTTCGACGTTTTCAAAGAAGTCAAAGTTACACC<br>ACGCAAACGAAAACATCTTCTACTGCCCATCGC<br>AATCATGTCAGCACTGGCAATGGTTTACCTGGG<br>CGCAAAGACTCAACGCGAACGCAGATCAACAA<br>AGTTGTTTCGATTCGACAAAAGTCCCGGCTTCGG<br>CGACTCAATCGAAGCACAGTGGCGCACGTCAGT<br>TAACGTCACTCATCACTGCGAGACATCCTGAAC<br>CAGATCACGAAACCCAACGACGTTTACTCATTCT<br>CACTGGCATCAGCACTGTACGCAGAAGAACGAT<br>ACCCATCCTGCCCGAATACCTGCAGTGCCTTAA<br>AGAAGTGTACCGAGGCGGCTTGAACCCATCAA<br>CTCCAGACGGCAGCAGACCAGGCACGAGAAT<br>GATCAACTCATGGGTTGAATCACAGACGAACGG<br>CATCATCCGAAACGTTCTGCAGCCCTCATCAGTT<br>GACTCACAGACGGCAATGGTTCTGGTTAACGCA<br>ATCGTTTTCAAAGGCCTGTGGGAAAAACGTTT<br>AAAGACGAAGACACGCAGGCAATGCCCTCCGA<br>GTTACGGAACAGGAATCAAACCCGTTTCAGATG<br>ATGTACCAGATCGGCCTGTTCCGAGTTGCATCA<br>ATGGCATCAGAAAAATGAAAAATCCTGGAAGTGC<br>CCCTTCGCATCAGGCACGATGTCAATGCTGGTTC<br>TGCTGCCCGACGAAGTTTCAGGCCTGGAACAGC<br>TGGAATCAATCATCAACTTCGAAAAACTGACGG<br>AATGGACGTCATCAAACGTTATGGAAGAACGAA<br>AAATCAAAGTTTACCTGCCCGAATGAAAAATGG<br>AAGAAAAATACAACCTGACGTCAGTTCTGATGG<br>CAATGGGCATCACGGACGTTTTCTCATCATCAGC<br>AAACCTGTCAGGCATCTCATCAGCAGAATCACTG<br>AAAAATCTCACAGGCAGTTCACGCAGCACACGCA<br>GAAATCAACGAAGCAGGCCGAGAAGTTGTTGGC<br>TCAGCAGAAGCAGGCGTTGACGCAGCATCAGTT<br>TCAGAAGAAATCCGAGCAGACCACCCCTTCTGT<br>TCTGCATCAAACACATCGCAACGAACGAGTTCT<br>GTTCTTCGGCCGATGCGTTTTACCC |

**Table S19.** All sequences used cont.

| Plasmid | gid | name | DNA | GK  | Long name        | Alternate name | CDS                                                                                                                                                                                                                                                                                                                                                                                                                                                                                                                                                                                                                                                                                                                                                                                                                                                                                                                                                                                                                                                                                                                                                                                                                                                                                                                                          |
|---------|-----|------|-----|-----|------------------|----------------|----------------------------------------------------------------------------------------------------------------------------------------------------------------------------------------------------------------------------------------------------------------------------------------------------------------------------------------------------------------------------------------------------------------------------------------------------------------------------------------------------------------------------------------------------------------------------------------------------------------------------------------------------------------------------------------------------------------------------------------------------------------------------------------------------------------------------------------------------------------------------------------------------------------------------------------------------------------------------------------------------------------------------------------------------------------------------------------------------------------------------------------------------------------------------------------------------------------------------------------------------------------------------------------------------------------------------------------------|
| pJT19   |     | ova3 | 714 | 439 | ova_orig505<br>0 | Intermediate   | ATGGGCTCAATCGGGCGCTGCTTCCATGGAATTT<br>TGTTTGGACGTATTCAAAGAAGTCAAAGTTCCACC<br>ATGCCAACGAAAACATCTTCTATTGTCCAATCGC<br>TATCATGTCCGCCCTGGCAATGGTATACCTGGG<br>CGCCAAAGACTCAACAAGGACGCAAATCAATAA<br>GGTGGTTTCGATTTGACAAGCTGCCCGGCTTCGG<br>TGACTCGATCGAGGGCAGTGGCGGACCTCAGT<br>TAATGTTCACTCATCACTGCGCGATATTCTGAAT<br>CAGATTACGAAACCTAATGATGTGTACTCGTTC<br>TCATTGGCATCTCGACTATACGCAGAAGAGCGC<br>TATCCGATCTTACCCGAGTACTTGCAATGCGTG<br>AAAGAGCTTTACCGAGGGGGCCTGGAACCGATC<br>AATTTTCAGACTGCTGCCGACCAAGCTCGAGAG<br>CTTATTAACCTCTTGGGTTGAATCACAAACAAACG<br>GAATCATCCGTAATGTAAGTGCAGCCCTCTTCAGT<br>GGACTCACAAACTGCCATGGTCTTGGTAAATGC<br>GATCGTATTTAAAGGTTTGTGGGAGAAGACTTT<br>CAAAGACGAAGACACACAAGCTATGCCGTTCCG<br>AGTTACGGAACAAGAGTCAAAGCCTGTTCAAAT<br>GATGTATCAAATCGGCTTATTCAGTAGCATC<br>GATGGCAAGCGAAAAAATGAAGATCCTGGAGCT<br>GCCTTTCGCATCAGGGACGATGTCAATGTTGGT<br>ATTACTCCCTGATGAAGTCTCAGGTCTGGAACA<br>GCTGGAGTCTATTATCAACTTCGAAAAACTGACC<br>GAATGGACTTCATCGAATGTTATGGAAGAACGC<br>AAAATCAAGGTGTACTTGCCCCGAATGAAGATG<br>GAGGAAAAATATAATCTGACTAGTGTCTGATG<br>GCGATGGGGATCACAGACGTATTTTCATCGTCT<br>GCTAATTTGAGTGGAATCTCATCGGCTGAGTCC<br>CTAAAGATCTCACAAGCTGTGCACGCGGCACAT<br>GCTGAGATCAACGAGGCGGGGCGAGAAGTAGTT<br>GGTAGTGCTGAAGCGGGGTTGACGCAGCCTCA<br>GTATCGGAGGAATTCGCTGCCGATCACCCCTTCT<br>TATTTGCATCAAGCACATTGCAACAAACGCCGT<br>CTTATTCTTTGGGCGATGTGTTTCCCA |

## 6 Optimized Codon Translation fOr PRotein Synthesis - OCTOPOS

The Java GUI application OCTOPOS (Optimized Codon Translation fOr PRotein Synthesis) facilitates optimization of sequences for heterologous expression in *E. coli*, *S. cerevisiae*, and HEK293 cell lines as default expression systems. OCTOPOS allows to configure the parameters of the optimization scheme and to consider alternative expression systems. It uses a slightly simpler variant of the scoring function described in this manuscript, in which function estimates for all features are constrained to linear effects except for the feature GC3 content for which a quadratic approximation was used. OCTOPOS and its software manual are available upon request.

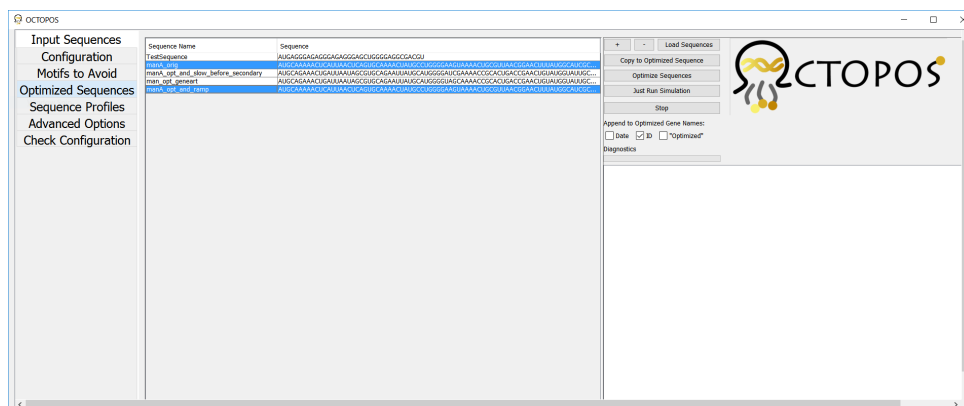

Figure S27. OCTOPOS software

## References

1. Lakatos, G. & Chou, T. Totally asymmetric exclusion processes with particles of arbitrary size. *Journal of Physics A: Mathematical and General* **36**, 2027 (2003). URL <http://iopscience.iop.org/0305-4470/36/8/302>.
2. Nakamura, Y., Gojobori, T. & Ikemura, T. Codon usage tabulated from international DNA sequence databases: status for the year 2000. *Nucleic Acids Res.* **28**, 292-292 (2000). URL <http://nar.oxfordjournals.org/content/28/1/292.short>.
3. Rudolf, S., Thommen, M., Rodnina, M. V. & Lipowsky, R. Deducing the kinetics of protein synthesis in vivo from the transition rates measured in vitro. *PLoS Computational Biology* **10**, e1003909 (2014). URL <http://dx.doi.org/10.1371/journal.pcbi.1003909>.
4. Rudolf, S. & Lipowsky, R. Protein Synthesis in *E. coli*: Dependence of Codon-Specific Elongation on tRNA Concentration and Codon Usage. *PLoS One* **10**, 1-22 (2015).
5. Wang, M. *et al.* PaxDb, a database of protein abundance averages across all three domains of life. *Molecular & Cellular Proteomics* **11**, 492-500 (2012).
6. Siwiak, M. & Zielenkiewicz, P. A comprehensive, quantitative, and genome-wide model of translation. *PLoS Computational Biology* **6**, e1000865 (2010).

7. International Human Genome Sequencing Consortium. Initial sequencing and analysis of the human genome. *Nature* **409**, 860–921 (2001). URL <http://dx.doi.org/10.1038/35057062>.
8. Kramer, E. B. & Farabaugh, P. J. The frequency of translational misreading errors in *E. coli* is largely determined by tRNA competition. *RNA* **13**, 87–96 (2007). URL <http://rnajournal.cshlp.org/content/13/1/87.short>.
9. von der Haar, T. A quantitative estimation of the global translational activity in logarithmically growing yeast cells. *BMC Systems Biology* **2**, 87 (2008).
10. Kishore, S. *et al.* A quantitative analysis of CLIP methods for identifying binding sites of RNA-binding proteins. *Nat Meth* **8**, 559–564 (2011). URL <http://dx.doi.org/10.1038/nmeth.1608>.
11. Zheng, G. *et al.* Efficient and quantitative high-throughput tRNA sequencing. *Nature Methods* **12**, 835–837 (2015). URL <http://dx.doi.org/10.1038/nmeth.3478>.
12. Geiger, T., Wehner, A., Schaab, C., Cox, J. & Mann, M. Comparative proteomic analysis of eleven common cell lines reveals ubiquitous but varying expression of most proteins. *Molecular & Cellular Proteomics* **11** (2012). URL <http://www.mcponline.org/content/11/3/M111.014050.abstract>. <http://www.mcponline.org/content/11/3/M111.014050.full.pdf+html>.
13. Nagaraj, N. *et al.* System-wide perturbation analysis with nearly complete coverage of the yeast proteome by single-shot ultra HPLC runs on a bench top Orbitrap. *Molecular & Cellular Proteomics* **11**, M111–013722 (2012).
14. Tyson, C. B., Lord, P. G. & Wheals, A. E. Dependency of size of *Saccharomyces cerevisiae* cells on growth rate. *Journal of Bacteriology* **138**, 92–98 (1979).
15. Billiard, J. *et al.* Quinoline 3-sulfonamides inhibit lactate dehydrogenase A and reverse aerobic glycolysis in cancer cells. *Cancer & Metabolism* **1**, 1–17 (2013). URL <http://dx.doi.org/10.1186/2049-3002-1-19>.
16. Boström, K., Km *et al.* Pulse-chase studies of the synthesis and intracellular transport of apolipoprotein B-100 in HepG2 cells. *Journal of Biological Chemistry* **261**, 13800–13806 (1986). URL <http://www.jbc.org/content/261/29/13800.abstract>.
17. Jørgensen, F. & Kurland, C. G. Processivity errors of gene expression in *Escherichia coli*. *Journal of molecular biology* **215**, 511–521 (1990).
18. Sin, C., Chiarugi, D. & Valleriani, A. Quantitative assessment of ribosome drop-off in *E. coli*. *Nucleic Acids Research* **44**, 2528–2537 (2016).
19. Arava, Y., Boas, F. E., Brown, P. O. & Herschlag, D. Dissecting eukaryotic translation and its control by ribosome density mapping. *Nucleic Acids Research* **33**, 2421–2432 (2005).
